# Supplementary material for: A genome-wide association study of copy-number variation identifies putative loci associated with osteoarthritis in Koreans
Source: BMC Musculoskelet Disord. 2015 Apr 4;16:76. doi: 10.1186/s12891-015-0531-4 (PMC4395893; doi:10.1186/s12891-015-0531-4)
Supplement: Additional file 2: — Result of CNVtools with estimated genotypes and Log2 ratio information. We used LDF value among three different genotype information such as raw, PCA, and LDF. PCA: Principal components analysis, LDF: linear discrimination function. [file 12891_2015_531_MOESM2_ESM.xlsx]

## Sheet: chr8_9535412_9536779
IDV	CNV genotype			Signal Intensity (log2 ratio)
	Raw	PCA	LDF	Raw	PCA	LDF
CASE1	2	3	2	-0.272369	-0.15139	0.755538
CASE2	3	3	1	0.0464748	0.717383	-0.0484695
CASE3	2	2	2	-0.56083	-1.07158	1.6651
CASE4	2	2	2	-0.369582	-0.516896	1.24309
CASE5	3	3	1	0.0242298	0.647623	-0.0485305
CASE6	3	3	1	-0.00393214	0.573603	0.00970729
CASE7	3	3	1	0.0140265	0.645599	-0.037994
CASE8	2	2	2	-0.528953	-0.979612	1.67884
CASE9	1	1	3	-2.08951	-5.51532	5.87933
CASE10	3	3	1	-0.00222815	0.582588	0.0151927
CASE11	3	3	1	0.0179641	0.612307	0.00879507
CASE12	1	1	3	-1.94118	-5.09217	5.33486
CASE13	3	3	1	0.0253504	0.646326	-0.118166
CASE14	3	3	1	0.0201615	0.632727	-0.120091
CASE15	3	3	1	-0.0179799	0.501597	-0.0717703
CASE16	3	3	1	0.0112695	0.608157	-0.138859
CASE17	3	3	1	-0.0159956	0.505561	0.113264
CASE18	3	3	1	0.0301987	0.678805	-0.0953139
CASE19	3	3	1	-0.0218674	0.475701	0.17485
CASE20	2	2	2	-0.323943	-0.37772	0.935114
CASE21	3	3	1	0.00219682	0.553874	0.0544322
CASE22	3	3	1	-0.00835595	0.555206	0.0890165
CASE23	2	2	2	-0.298884	-0.271083	0.807215
CASE24	3	3	1	-0.00926806	0.571442	-0.0184233
CASE25	2	2	1	-0.271801	-0.203368	0.68828
CASE26	3	3	1	-0.00814876	0.565301	0.0338128
CASE27	3	3	1	0.00630664	0.600853	-0.0447528
CASE28	2	2	2	-0.401068	-0.587459	1.14049
CASE29	3	3	1	0.0274344	0.63891	-0.0258643
CASE30	3	3	1	-0.0352343	0.481194	0.0251003
CASE31	2	2	2	-0.501351	-0.879128	1.29663
CASE32	2	2	2	-0.546706	-1.03022	1.4498
CASE33	3	3	1	-0.00094203	0.574562	-0.0820847
CASE34	3	3	1	0.0141097	0.6111	-0.0280866
CASE35	2	2	2	-0.487524	-0.89158	1.43771
CASE36	1	1	3	-1.44689	-3.53027	4.70727
CASE37	3	3	1	0.0202494	0.609872	0.0269748
CASE38	1	2	3	-1.05193	-2.32956	3.14598
CASE39	2	2	2	-0.339104	-0.373998	1.15956
CASE40	3	3	1	0.0436611	0.678846	0.000878011
CASE41	2	2	2	-0.264632	-0.179523	0.812646
CASE42	3	3	1	0.0125791	0.594762	0.137227
CASE43	2	2	2	-0.528411	-0.987347	1.41419
CASE44	2	2	2	-0.293482	-0.257194	1.1407
CASE45	2	2	2	-0.386329	-0.552816	1.30907
CASE46	3	3	1	0.0175998	0.61898	-0.0430636
CASE47	3	3	1	0.013498	0.590069	0.274894
CASE48	3	3	1	0.0195997	0.610151	0.0124029
CASE49	3	3	1	-0.0392749	0.467956	0.0393338
CASE50	2	2	2	-0.341754	-0.389341	1.13768
CASE51	2	2	2	-0.462305	-0.764657	1.51037
CASE52	3	3	1	0.0504608	0.729092	0.0628155
CASE53	3	3	1	-0.183866	0.0768669	0.738119
CASE54	3	3	1	0.0432391	0.736072	-0.134266
CASE55	3	3	1	0.0214302	0.652345	0.0275582
CASE56	2	2	2	-0.376726	-0.52397	0.99441
CASE57	3	3	1	0.0157682	0.624039	0.0106414
CASE58	3	3	1	0.0222167	0.6627	0.0466897
CASE59	3	3	1	0.0663882	0.762883	-0.0675947
CASE60	2	2	2	-0.385089	-0.527953	1.12628
CASE61	2	2	2	-0.597328	-1.20692	1.6969
CASE62	3	3	1	0.00602406	0.585068	-0.0458558
CASE63	2	2	2	-0.372069	-0.506583	1.11795
CASE64	3	3	1	-0.00832195	0.532667	0.060418
CASE65	1	1	3	-1.2585	-3.02763	3.85243
CASE66	1	1	3	-1.17587	-2.79488	3.78707
CASE67	2	2	2	-0.385494	-0.566119	1.034
CASE68	3	3	1	-0.23878	-0.103453	0.689191
CASE69	2	2	2	-0.342893	-0.420679	1.20748
CASE70	3	3	1	0.0655361	0.765332	0.0894624
CASE71	3	3	1	0.00375578	0.593476	0.0165951
CASE72	2	2	2	-0.40082	-0.592347	1.25264
CASE73	3	3	1	0.00289278	0.557799	0.0674451
CASE74	3	3	1	-0.121787	0.266546	0.22774
CASE75	3	3	1	0.0275988	0.623885	-0.239138
CASE76	2	2	2	-0.495474	-0.931091	1.24083
CASE77	3	3	1	-0.0137979	0.486824	0.144788
CASE78	2	2	2	-0.39147	-0.592913	1.00266
CASE79	3	3	1	0.0497499	0.726463	-0.0346818
CASE80	2	2	2	-0.545924	-1.02933	1.51993
CASE81	3	3	1	-0.0140016	0.536242	0.368066
CASE82	3	3	1	-0.0370646	0.442212	0.0928494
CASE83	3	3	1	-0.0275767	0.49465	-0.0619874
CASE84	3	3	1	-0.171243	0.0887246	0.650245
CASE85	3	3	1	-0.213093	-0.0129511	0.566711
CASE86	3	3	1	0.0443377	0.716515	0.0520509
CASE87	1	2	3	-1.07379	-2.40372	3.23359
CASE88	3	3	1	0.0706869	0.812765	-0.202479
CASE89	3	3	1	-0.0052526	0.527225	0.189059
CASE90	3	3	1	-0.000660825	0.572653	-0.0724022
CASE91	3	3	1	0.0348642	0.674248	0.0880422
CASE92	3	3	1	0.00950073	0.614266	0.0926322
CASE93	2	2	2	-0.382474	-0.553721	1.10991
CASE94	2	2	2	-0.388857	-0.56642	1.26144
CASE95	3	3	1	-0.0265167	0.464268	0.229858
CASE96	3	3	1	-0.154057	0.163558	0.59286
CASE97	2	2	2	-0.600385	-1.15503	1.70039
CASE98	3	3	1	0.0709338	0.822775	-0.00176358
CASE99	2	2	2	-0.760179	-1.52368	2.09059
CASE100	3	3	1	0.0221689	0.600668	-0.252909
CASE101	3	3	1	0.00334472	0.610527	0.0345838
CASE102	3	3	1	-0.00414278	0.531476	-0.211705
CASE103	3	3	1	-0.0259629	0.512978	0.121087
CASE104	2	2	2	-0.598328	-1.21429	1.49593
CASE105	3	3	1	0.033119	0.681193	-0.258352
CASE106	3	3	1	-0.0335551	0.474548	0.0294571
CASE107	2	2	2	-0.62395	-1.27738	1.69519
CASE108	3	3	1	-0.027327	0.466751	-0.08879
CASE109	3	3	1	0.0139627	0.635762	-0.138744
CASE110	3	3	1	0.00712268	0.626518	-0.0429736
CASE111	3	3	1	0.0026705	0.595551	-0.00964589
CASE112	2	2	2	-0.482038	-0.871862	1.29073
CASE113	1	2	2	-1.015	-2.24863	2.6496
CASE114	3	3	1	0.00403808	0.609673	-0.0094215
CASE115	2	2	2	-0.775745	-1.56102	1.67754
CASE116	2	2	2	-0.396184	-0.544494	1.32081
CASE117	3	3	1	-0.0051914	0.537819	-0.0471073
CASE118	2	2	2	-0.437532	-0.699633	1.43014
CASE119	3	3	1	0.00635726	0.5879	-0.0682745
CASE120	3	3	1	0.0165558	0.605365	-0.0560547
CASE121	3	3	1	0.0280856	0.676712	-0.139981
CASE122	3	3	1	0.0116547	0.626336	0.0112482
CASE123	2	2	2	-0.480774	-0.814714	1.44334
CASE124	3	3	1	-0.0260161	0.502176	0.0401283
CASE125	2	2	2	-0.473213	-0.801616	1.44913
CASE126	2	2	2	-0.331167	-0.391638	0.994491
CASE127	2	2	2	-0.532566	-1.02047	1.49221
CASE128	2	2	2	-0.482811	-0.85596	1.34873
CASE129	2	2	2	-0.308187	-0.320544	0.96366
CASE130	2	2	2	-0.791792	-1.6163	2.56217
CASE131	3	3	1	-0.0218277	0.48604	0.0235217
CASE132	3	3	1	-0.0111916	0.517792	0.0587803
CASE133	3	3	1	-0.038629	0.471358	0.0478728
CASE134	3	3	1	-0.0192073	0.503193	-0.125715
CASE135	3	3	1	0.0298945	0.619231	0.0961292
CASE136	2	2	2	-0.468754	-0.79534	1.3872
CASE137	2	2	2	-0.392237	-0.512333	1.30519
CASE138	3	3	1	-0.0017703	0.583208	-0.123571
CASE139	3	3	1	0.0545112	0.731079	0.00632461
CASE140	3	3	1	-0.0122079	0.533555	-0.00566904
CASE141	3	3	1	0.0174699	0.611637	-0.0754751
CASE142	3	3	1	-0.0236174	0.491941	-0.0647471
CASE143	3	3	1	0.00858994	0.602445	-0.160696
CASE144	3	3	1	-0.228044	-0.0397641	0.551714
CASE145	3	3	1	0.00242991	0.623689	0.128009
CASE146	3	3	1	0.0221838	0.636561	0.0703401
CASE147	2	2	2	-0.469954	-0.822443	1.48541
CASE148	3	3	1	0.0215018	0.665718	-0.0611293
CASE149	2	2	2	-0.366005	-0.459724	1.22069
CASE150	3	3	1	-0.0237	0.506282	0.199384
CASE151	3	3	1	0.0501209	0.724404	0.059365
CASE152	3	3	1	-0.0507345	0.414657	-0.000686282
CASE153	3	3	1	-0.0257367	0.492376	0.084289
CASE154	3	3	1	-0.00217244	0.564017	0.058364
CASE155	3	3	1	0.00556593	0.597801	-0.0320767
CASE156	2	2	2	-0.320535	-0.307886	1.04893
CASE157	3	3	1	0.0830155	0.844935	-0.274827
CASE158	3	3	1	0.0324882	0.677852	-0.0764468
CASE159	3	3	1	0.0253954	0.677964	-0.0583221
CASE160	2	2	2	-0.431324	-0.684831	1.27989
CASE161	3	3	1	-0.0364478	0.446134	-0.233172
CASE162	3	3	1	-0.0276084	0.502327	-0.0513351
CASE163	3	3	1	-0.017791	0.517733	0.00440908
CASE164	2	2	2	-0.529362	-0.953279	1.4769
CASE165	3	3	1	0.0440625	0.722934	0.0733186
CASE166	3	3	1	0.0276791	0.648999	-0.13322
CASE167	1	1	3	-1.39087	-3.36838	4.34852
CASE168	3	3	1	-0.0132629	0.533223	0.0528289
CASE169	3	3	1	0.0209491	0.649601	-0.0866135
CASE170	2	2	2	-0.374898	-0.48975	1.10012
CASE171	2	2	2	-0.363842	-0.51057	1.07944
CASE172	3	3	1	0.0341992	0.686624	-0.00351728
CASE173	3	3	1	0.0753742	0.776326	-0.152079
CASE174	2	2	2	-0.484148	-0.900972	1.41433
CASE175	3	3	1	0.0827067	0.730118	0.37923
CASE176	3	3	1	0.0171746	0.588062	0.0632833
CASE177	3	3	1	0.00505917	0.583629	0.0187085
CASE178	3	3	1	0.00162566	0.561215	0.060837
CASE179	3	3	1	0.118975	0.971521	-0.115335
CASE180	3	3	1	0.0235907	0.657402	0.0225696
CASE181	2	2	2	-0.329976	-0.401626	1.02589
CASE182	3	3	1	0.0316656	0.675345	0.00825328
CASE183	3	3	1	0.0060361	0.603383	0.00921152
CASE184	3	3	1	0.0559397	0.753716	-0.0655431
CASE185	3	3	1	-0.177224	0.0542547	0.610867
CASE186	2	2	2	-0.299214	-0.270187	0.900955
CASE187	3	3	1	-0.0187373	0.489073	0.0820162
CASE188	2	2	2	-0.405313	-0.626714	1.23784
CASE189	2	2	2	-0.271745	-0.202088	0.908813
CASE190	3	3	1	0.0126263	0.574509	0.0109392
CASE191	3	3	1	0.0351504	0.667157	0.0233274
CASE192	3	3	1	0.0231721	0.621061	0.00974601
CASE193	3	3	1	0.0414233	0.693488	-0.115675
CASE194	2	2	2	-0.437883	-0.715201	1.41353
CASE195	3	3	1	-0.0134823	0.519119	0.184076
CASE196	3	3	1	0.0385523	0.731554	0.0586552
CASE197	3	3	1	-0.00210764	0.545454	-0.0778706
CASE198	3	3	1	0.0189795	0.606339	-0.0948397
CASE199	3	3	1	-0.000481255	0.569632	0.168829
CASE200	3	3	1	-0.000293673	0.541677	0.076953
CASE201	2	2	2	-0.476689	-0.837969	1.3092
CASE202	2	2	2	-0.542008	-1.01378	1.4448
CASE203	2	2	2	-0.354367	-0.439996	1.16798
CASE204	3	3	1	0.0186874	0.636601	0.0886075
CASE205	3	3	1	0.0453342	0.698609	-0.105841
CASE206	2	2	2	-0.56372	-1.08636	1.61844
CASE207	3	3	1	-0.00205327	0.574957	-0.0297889
CASE208	3	3	1	0.0500923	0.765384	0.373179
CASE209	3	3	1	0.00781751	0.591332	-0.0944975
CASE210	3	3	1	0.0123224	0.584158	-0.148084
CASE211	3	3	1	0.0821871	0.798382	-0.204245
CASE212	3	3	1	-0.0209173	0.508203	0.0724177
CASE213	3	3	1	-0.144038	0.144666	0.498784
CASE214	3	3	2	-0.221933	-0.0829561	0.935477
CASE215	3	3	1	0.139328	1.09009	-0.362439
CASE216	3	3	1	0.0136558	0.610068	0.109595
CASE217	2	2	2	-0.525623	-0.920791	1.54338
CASE218	3	3	1	-0.0102807	0.573017	-0.0749999
CASE219	3	3	1	0.0103994	0.629887	-0.0667375
CASE220	3	3	1	-0.0231215	0.507637	0.0556847
CASE221	3	3	1	0.146991	1.08104	0.0184118
CASE222	3	3	1	0.0126925	0.613639	-0.110779
CASE223	3	3	1	-0.00567906	0.574317	-0.0169854
CASE224	3	3	1	-0.14343	0.210263	0.464325
CASE225	2	2	2	-0.475175	-0.801622	1.43856
CASE226	2	2	2	-0.424858	-0.627764	1.33773
CASE227	3	3	1	0.0566137	0.743538	-0.0662614
CASE228	3	3	1	0.0531437	0.753283	-0.166275
CASE229	2	2	2	-0.430357	-0.663703	1.43206
CASE230	2	2	2	-0.429815	-0.618932	1.20353
CASE231	3	3	1	0.00801468	0.613304	-0.0751729
CASE232	3	3	1	-0.0252843	0.508798	0.0732802
CASE233	2	2	2	-0.587831	-1.15747	1.6376
CASE234	3	3	1	-0.0133674	0.529711	-0.0205149
CASE235	3	3	1	-0.00816042	0.535256	-0.148274
CASE236	3	3	1	0.00605264	0.594776	-0.101715
CASE237	3	3	1	-0.0296308	0.504326	0.0602851
CASE238	3	3	1	0.0408231	0.711609	-0.124804
CASE239	2	2	2	-0.825128	-1.65402	2.25229
CASE240	2	2	2	-0.406374	-0.623984	1.14345
CASE241	3	3	1	0.0817015	0.824978	-0.13837
CASE242	3	3	1	0.0243677	0.646048	-0.0879929
CASE243	3	3	1	0.0133626	0.602813	0.119869
CASE244	3	3	1	-0.00955054	0.573355	-0.134859
CASE245	2	2	2	-0.424637	-0.650107	1.28029
CASE246	3	3	1	0.0168039	0.606819	-0.101936
CASE247	3	3	1	0.0216143	0.640735	-0.0396315
CASE248	3	3	1	-0.0268909	0.496595	0.063042
CASE249	3	3	1	-0.0294336	0.475932	0.123144
CASE250	3	3	1	0.00268624	0.599222	0.190728
CASE251	3	3	1	-0.0111316	0.579319	-0.0880728
CASE252	2	3	2	-0.270964	-0.140674	0.826679
CASE253	3	3	1	-0.049974	0.43294	0.0400957
CASE254	2	2	2	-0.547572	-1.02646	1.68312
CASE255	3	3	1	-0.0222586	0.493616	-0.275603
CASE256	3	3	1	0.0246003	0.667773	-0.285884
CASE257	3	3	1	0.057019	0.753402	0.011312
CASE258	3	3	1	0.0126634	0.620866	0.0423294
CASE259	3	3	1	0.0248585	0.653843	-0.100281
CASE260	3	3	1	-0.0178207	0.504955	0.0697662
CASE261	3	3	1	-0.0105351	0.56915	0.0806967
CASE262	3	3	1	-0.0137095	0.539037	0.0507504
CASE263	3	3	1	0.00262542	0.574814	0.0465589
CASE264	2	2	2	-0.426785	-0.673207	1.23055
CASE265	3	3	1	0.0055126	0.575204	-0.0260807
CASE266	3	3	1	-0.249009	-0.137954	0.745958
CASE267	3	3	1	0.0575406	0.771497	-0.221809
CASE268	3	3	1	0.00671035	0.60782	0.0538771
CASE269	2	2	2	-0.514954	-0.939184	1.53308
CASE270	3	3	1	0.0161428	0.639674	0.0254853
CASE271	3	3	1	-0.0119255	0.546892	0.0910408
CASE272	3	3	1	0.0013893	0.578013	0.0139296
CASE273	2	2	2	-0.646721	-1.19694	1.70253
CASE274	2	2	2	-0.514215	-0.925651	1.52963
CASE275	3	3	1	-0.00528957	0.531273	0.0706275
CASE276	3	3	1	0.000793393	0.572733	-0.126988
CASE277	2	2	2	-0.424443	-0.671895	1.39528
CASE278	3	3	1	0.0201264	0.598077	-0.0124532
CASE279	3	3	1	0.0548303	0.761937	0.058642
CASE280	3	3	1	-0.124053	0.22202	0.462553
CASE281	2	3	2	-0.251643	-0.121399	0.784157
CASE282	3	3	1	-0.024262	0.505263	-0.058608
CASE283	2	2	2	-0.506692	-0.942037	1.31891
CASE284	2	2	2	-0.319521	-0.370495	1.16891
CASE285	3	3	1	-0.0204548	0.45573	0.0739587
CASE286	3	3	1	-0.00317674	0.550317	0.0052875
CASE287	2	2	2	-0.385612	-0.56021	1.25403
CASE288	3	3	1	-0.00427585	0.563578	0.0766699
CASE289	3	3	1	0.00260394	0.559745	-0.0287409
CASE290	3	3	1	0.00298747	0.550033	0.0837601
CASE291	2	2	2	-0.866293	-1.92485	2.74956
CASE292	3	3	1	-0.0185273	0.511614	-0.0790838
CASE293	2	2	2	-0.380483	-0.570626	1.0923
CASE294	3	3	1	-0.0435701	0.44418	0.156369
CASE295	3	3	1	-0.0905972	0.318315	0.0127701
CASE296	3	3	1	-0.0166805	0.513296	0.092196
CASE297	2	2	2	-0.618244	-1.27959	1.81561
CASE298	3	3	1	0.00756328	0.573498	-0.0591326
CASE299	3	3	1	-0.00393538	0.526607	-0.0332989
CASE300	3	3	1	-0.00678015	0.571834	-0.00191829
CASE301	2	2	2	-0.431726	-0.62673	1.23955
CASE302	3	3	1	0.0306803	0.657482	-0.0692918
CASE303	2	2	2	-0.473855	-0.823356	1.46084
CASE304	3	3	1	-0.0362279	0.48193	0.154863
CASE305	3	3	1	-0.000845132	0.563575	0.144162
CASE306	3	3	1	-0.0509178	0.431329	0.213265
CASE307	2	2	2	-0.515964	-0.938132	1.56918
CASE308	3	3	1	-0.0204533	0.506854	0.0849615
CASE309	2	2	2	-0.343972	-0.379821	1.16841
CASE310	3	3	1	-0.00488278	0.585027	0.111994
CASE311	2	2	2	-0.481679	-0.814212	1.52482
CASE312	3	3	1	0.0174417	0.642885	0.116876
CASE313	3	3	1	-0.0035791	0.575007	-0.0452498
CASE314	3	3	1	0.0442424	0.698397	-0.135367
CASE315	3	3	1	0.000496507	0.585722	0.060148
CASE316	2	2	2	-0.430614	-0.700687	1.36256
CASE317	3	3	1	0.0416313	0.654806	0.0167206
CASE318	2	2	2	-0.352937	-0.425296	1.14025
CASE319	3	3	1	0.00690751	0.592926	-0.0520986
CASE320	3	3	1	0.019033	0.635188	0.166287
CASE321	3	3	1	0.00182174	0.579106	0.0687499
CASE322	2	2	2	-0.38616	-0.571312	1.22326
CASE323	3	3	1	-0.0291533	0.458424	0.0547947
CASE324	2	2	2	-0.640403	-1.32013	1.67409
CASE325	3	3	1	-0.0146316	0.54503	0.0503562
CASE326	3	3	1	-0.0150235	0.542787	0.0861608
CASE327	3	3	1	0.023202	0.673464	0.0918911
CASE328	3	3	1	-0.00214117	0.565136	-0.0624268
CASE329	3	3	1	-0.0445969	0.450395	0.10473
CASE330	3	3	1	0.0177844	0.650379	-0.0190512
CASE331	3	3	1	-0.0217692	0.534956	0.0349507
CASE332	3	3	1	0.00502785	0.632019	0.0291412
CASE333	3	3	1	0.00980223	0.607438	-0.0020111
CASE334	3	3	1	-0.0208836	0.492313	-0.0220792
CASE335	3	3	1	-0.0817428	0.278977	0.0452049
CASE336	3	3	1	0.0231307	0.663421	-0.0385052
CASE337	2	2	2	-0.363198	-0.435357	1.07054
CASE338	3	3	1	-0.00423032	0.581326	0.022971
CASE339	3	3	1	-0.0508225	0.430491	0.155218
CASE340	3	3	1	-0.021186	0.508942	0.0529499
CASE341	2	2	2	-0.546529	-1.01116	1.66698
CASE342	3	3	1	0.0287831	0.668711	-0.068874
CASE343	2	2	2	-0.32274	-0.284575	0.953466
CASE344	3	3	1	-0.0169671	0.512938	-0.0318607
CASE345	3	3	1	-0.0143695	0.522145	0.0599882
CASE346	2	2	2	-0.367323	-0.504387	1.16362
CASE347	3	3	1	-0.0267316	0.51042	0.0369857
CASE348	2	2	2	-0.360801	-0.471068	1.14448
CASE349	2	2	2	-0.482286	-0.813535	1.52403
CASE350	3	3	1	-0.0179471	0.538461	0.0766855
CASE351	3	3	1	0.0117826	0.634509	-0.0445904
CASE352	3	3	1	-0.0156846	0.53334	0.0611888
CASE353	3	3	1	0.0142264	0.640997	0.0325583
CASE354	3	3	1	-0.0175164	0.53337	0.0185379
CASE355	3	3	1	0.0179067	0.637783	-0.0167447
CASE356	3	3	1	0.011808	0.607668	0.0489177
CASE357	2	2	2	-0.388066	-0.53149	1.29644
CASE358	2	2	2	-0.344407	-0.401059	1.1545
CASE359	3	3	1	0.00489123	0.619549	0.0135478
CASE360	3	3	1	-0.00930935	0.580799	-0.0873016
CASE361	3	3	1	0.0111784	0.619808	0.0255361
CASE362	3	3	1	-0.0113404	0.57224	-0.0870583
CASE363	3	3	1	0.0345938	0.689265	-0.00201546
CASE364	3	3	1	0.0122777	0.620025	-0.063535
CASE365	2	2	2	-0.350978	-0.397383	1.16557
CASE366	3	3	1	0.000628168	0.613509	0.102087
CASE367	3	3	1	-0.00444023	0.596695	-0.0197348
CASE368	3	3	1	0.0179168	0.648287	0.0118343
CASE369	3	3	1	0.00204565	0.591177	0.0284654
CASE370	2	2	2	-0.392688	-0.563176	1.49242
CASE371	1	1	3	-1.61759	-4.08688	4.59174
CON1	2	2	2	-0.341761	-0.416858	1.2115
CON2	3	3	1	0.047267	0.736079	-0.0414943
CON3	3	3	1	0.043228	0.712764	-0.127393
CON4	3	3	1	-0.0541489	0.372504	0.117624
CON5	3	3	1	0.00703572	0.573591	-0.0175169
CON6	3	3	1	-0.0337039	0.439045	0.0163588
CON7	2	2	2	-0.599073	-1.20388	1.76274
CON8	3	3	1	0.0491549	0.748919	-0.0679546
CON9	2	2	2	-0.49503	-0.868022	1.47865
CON10	3	3	1	0.0121854	0.629501	0.0518336
CON11	3	3	1	0.0189537	0.645794	0.0702514
CON12	3	3	1	0.00543356	0.592092	0.0799955
CON13	3	3	1	0.0174579	0.650879	0.0228179
CON14	3	3	1	-0.0133242	0.503639	-0.0779638
CON15	2	2	2	-0.598087	-1.19504	1.64627
CON16	3	3	1	0.039885	0.696122	-0.0539666
CON17	2	2	2	-0.391442	-0.566116	1.30908
CON18	2	2	2	-0.539579	-1.00446	1.54941
CON19	2	2	2	-0.439314	-0.676112	1.27555
CON20	2	2	2	-0.551038	-1.04116	1.58052
CON21	3	3	1	0.0406625	0.704799	-0.179885
CON22	3	3	1	0.02781	0.658789	-0.121247
CON23	3	3	1	0.0318656	0.664106	-0.0661607
CON24	2	2	2	-0.60296	-1.21873	1.71342
CON25	2	2	2	-0.734602	-1.64665	1.85767
CON26	2	2	2	-0.579509	-1.13445	1.61777
CON27	2	2	2	-0.306426	-0.259834	0.914807
CON28	3	3	1	-0.00647315	0.547472	-0.0103006
CON29	3	3	1	-0.0336699	0.442674	0.061135
CON30	3	3	1	0.0248595	0.641826	-0.0197736
CON31	2	2	2	-0.501324	-0.866052	1.46505
CON32	2	2	2	-0.336236	-0.33507	1.33053
CON33	3	3	1	-0.0340881	0.453117	0.0498987
CON34	3	3	1	0.00726348	0.606338	-0.191897
CON35	1	1	3	-1.09792	-2.52133	3.10745
CON36	3	3	1	0.00375578	0.601413	-0.109686
CON37	3	3	1	0.00741706	0.594909	-0.0197384
CON38	3	3	1	-0.00366352	0.582265	0.101466
CON39	2	2	2	-0.399858	-0.622068	1.36696
CON40	3	3	1	-0.00780451	0.559682	0.0846944
CON41	3	3	1	0.029948	0.682853	-0.0791066
CON42	3	3	1	-0.0161473	0.51451	0.0388701
CON43	3	3	1	0.0116905	0.61745	0.011737
CON44	3	3	1	0.0531412	0.769219	-0.0459951
CON45	2	2	2	-0.645281	-1.38394	1.73009
CON46	1	1	3	-1.23686	-2.90956	3.80978
CON47	3	3	1	0.0083815	0.604579	-0.0986335
CON48	3	3	1	0.0266947	0.631478	0.108653
CON49	3	3	1	0.0296314	0.668546	0.0195955
CON50	3	3	1	0.00374529	0.591254	0.00319933
CON51	3	3	1	-0.0866602	0.373079	-0.185356
CON52	2	2	2	-0.290082	-0.22246	1.11012
CON53	2	2	2	-0.888898	-1.88318	2.51667
CON54	3	3	1	0.0516142	0.739716	-0.119513
CON55	2	2	2	-0.491863	-0.855721	1.39792
CON56	2	2	2	-0.576312	-1.12736	1.51782
CON57	3	3	1	0.0328062	0.684383	-0.0421127
CON58	2	2	2	-0.504692	-0.885829	1.56424
CON59	3	3	1	-0.149735	0.199116	0.333088
CON60	3	3	1	-0.00748052	0.537428	0.18299
CON61	3	3	1	0.052586	0.740727	0.00812328
CON62	2	2	2	-0.943843	-2.01454	2.77963
CON63	2	2	2	-0.433316	-0.732826	1.44127
CON64	2	2	2	-0.453326	-0.7159	1.40014
CON65	3	3	1	0.00394836	0.588716	-0.0241367
CON66	3	3	1	-0.0100535	0.5363	0.000238635
CON67	2	2	2	-0.331318	-0.382589	1.12039
CON68	3	3	1	0.0145864	0.607282	-0.137261
CON69	3	3	1	0.00681823	0.558983	0.131811
CON70	2	2	2	-0.47227	-0.818106	1.27946
CON71	3	3	1	0.00603689	0.602666	-0.0378109
CON72	3	3	1	0.0328073	0.650215	-0.18281
CON73	3	3	1	0.112989	0.83503	-0.0464211
CON74	2	2	2	-0.330864	-0.372134	1.11386
CON75	3	3	1	-0.178998	0.0803354	0.528219
CON76	2	2	2	-0.305296	-0.253448	0.984419
CON77	3	3	1	0.0668404	0.76531	0.0336645
CON78	1	1	3	-1.97026	-5.19551	5.16576
CON79	1	1	3	-1.35217	-3.27729	4.01709
CON80	2	2	2	-0.372607	-0.459343	0.932538
CON81	2	2	2	-0.555708	-1.00448	1.61801
CON82	3	3	1	0.0149804	0.593651	0.22127
CON83	3	3	1	0.0389806	0.741063	-0.0720627
CON84	3	3	1	0.0280571	0.675768	-0.00445519
CON85	3	3	1	0.0111816	0.607777	0.0572726
CON86	1	1	3	-1.27829	-3.08101	3.7662
CON87	2	2	2	-0.295766	-0.305247	1.02676
CON88	3	3	1	0.0744195	0.76969	-0.106303
CON89	3	3	1	-0.0192086	0.52538	0.0678976
CON90	3	3	1	-0.000620471	0.565807	-0.0302302
CON91	2	2	2	-0.618276	-1.25267	1.53714
CON92	1	1	3	-1.99113	-5.24875	5.19113
CON93	2	2	2	-0.525285	-1.00259	1.41711
CON94	2	2	2	-0.647545	-1.40445	1.77769
CON95	2	2	2	-0.611069	-1.293	1.69848
CON96	3	3	1	-0.00928541	0.525494	-0.0404432
CON97	1	1	3	-1.99573	-5.31429	5.31485
CON98	3	3	1	0.0050107	0.607535	-0.108777
CON99	3	3	1	-0.0267161	0.49448	-0.0148537
CON100	3	3	1	0.00109976	0.569155	-0.0354894
CON101	3	3	1	-0.0341923	0.467275	0.0581085
CON102	2	2	2	-0.528252	-1.00355	1.55998
CON103	1	1	3	-1.6396	-4.15722	4.54853
CON104	3	3	1	0.0240254	0.68092	-0.013924
CON105	2	2	2	-0.365652	-0.453811	1.19444
CON106	3	3	1	-0.00807455	0.5469	0.0320068
CON107	2	2	2	-0.538343	-1.01152	1.63657
CON108	2	2	2	-0.537006	-1.03256	1.68877
CON109	3	3	1	0.010127	0.573233	0.0914846
CON110	2	2	2	-0.290413	-0.258989	0.771026
CON111	3	3	1	0.0343439	0.684363	-0.123159
CON112	3	3	1	0.00773588	0.600725	-0.0296875
CON113	3	3	1	0.00254845	0.557732	-0.00841593
CON114	3	3	1	0.0311784	0.685746	-0.0641399
CON115	3	3	1	0.0150679	0.632656	-0.0185675
CON116	3	3	1	0.0267345	0.667751	-0.0496984
CON117	2	2	2	-0.4705	-0.751762	1.50416
CON118	2	2	2	-0.532573	-0.973219	1.47816
CON119	3	3	1	0.0224176	0.645338	-0.112943
CON120	3	3	1	0.010847	0.625645	-0.0441658
CON121	3	3	1	0.0196907	0.613315	-0.137377
CON122	2	2	2	-0.335684	-0.396958	1.22273
CON123	2	2	2	-0.453208	-0.727146	1.43906
CON124	3	3	1	0.0171381	0.603813	0.0129693
CON125	2	2	2	-0.904108	-1.97412	2.65728
CON126	2	2	2	-0.400193	-0.567162	1.23224
CON127	3	3	1	-0.182664	0.10428	0.595325
CON128	3	3	1	-0.0022422	0.584137	-0.000300045
CON129	2	2	2	-0.370143	-0.518682	1.24088
CON130	3	3	1	0.0415114	0.690129	0.056601
CON131	3	3	1	-0.0117421	0.534356	0.0396032
CON132	2	3	2	-0.262856	-0.148	0.808134
CON133	3	3	1	0.0226366	0.635122	-0.0259747
CON134	2	2	2	-0.453632	-0.73814	1.36594
CON135	2	2	2	-0.395236	-0.55421	1.26131
CON136	3	3	1	-0.0409562	0.438944	-0.0624005
CON137	3	3	1	-0.0345315	0.465774	0.164769
CON138	3	3	1	0.016901	0.638226	-0.0133698
CON139	3	3	1	0.0130164	0.600066	-0.051275
CON140	3	3	1	0.0538076	0.779391	-0.191474
CON141	3	3	1	-0.0225887	0.516598	0.0697484
CON142	3	3	1	-0.0674332	0.31098	0.15345
CON143	3	3	1	0.0168162	0.675994	-0.074556
CON144	2	2	2	-0.370624	-0.468098	1.07786
CON145	3	3	1	-0.0158013	0.535376	0.0429777
CON146	2	2	2	-0.332791	-0.344548	1.07801
CON147	3	3	1	0.00406194	0.567273	-0.0161752
CON148	3	3	1	0.0208157	0.607533	-0.0577994
CON149	3	3	1	-0.0143955	0.550105	-0.0860388
CON150	2	2	2	-0.332552	-0.386968	1.15892
CON151	2	2	2	-0.307381	-0.316526	1.09466
CON152	3	3	1	0.0216091	0.576101	0.0224777
CON153	3	3	1	0.0369984	0.698755	0.0714848
CON154	2	3	2	-0.255245	-0.151475	1.02876
CON155	3	3	1	0.0298795	0.655728	0.0916385
CON156	3	3	1	0.0398397	0.671554	-0.0389773
CON157	1	1	3	-1.58271	-3.9978	4.86565
CON158	2	2	2	-0.412348	-0.64457	1.22774
CON159	3	3	1	0.0394932	0.673019	0.0283403
CON160	3	3	1	-0.000124849	0.531796	0.00687302
CON161	3	3	1	0.0415055	0.692191	0.0169548
CON162	3	3	1	-0.00330648	0.582376	0.0727007
CON163	3	3	1	0.0981095	0.88155	-0.0416063
CON164	3	3	1	-0.00549282	0.554913	-0.0501261
CON165	2	2	2	-0.39691	-0.58995	1.29174
CON166	3	3	1	-0.0235376	0.536685	0.104892
CON167	3	3	1	0.0385293	0.657988	0.0864328
CON168	2	2	2	-0.534251	-0.975204	1.51538
CON169	3	3	1	0.000521637	0.608095	-0.0917354
CON170	3	3	1	-0.00742368	0.565005	0.000309775
CON171	3	3	1	-0.0145448	0.540145	-0.141682
CON172	3	3	1	0.020999	0.629338	-0.00467015
CON173	2	2	2	-0.304518	-0.290415	1.32203
CON174	3	3	1	0.0157975	0.605066	0.0926474
CON175	2	2	2	-0.87744	-1.92819	2.61086
CON176	2	2	2	-0.617187	-1.23636	1.59849
CON177	2	2	2	-0.529325	-0.984705	1.6108
CON178	3	3	1	0.0099147	0.625041	0.00673793
CON179	1	1	3	-1.45714	-3.63287	4.22231
CON180	3	3	1	0.00688949	0.593692	0.105443
CON181	3	3	1	0.0120727	0.607533	0.0889531
CON182	3	3	1	0.0197662	0.615892	0.161032
CON183	3	3	1	-0.044556	0.419326	0.205461
CON184	3	3	1	-0.00982405	0.525625	0.0778498
CON185	3	3	1	0.00894955	0.562077	0.0320003
CON186	1	1	3	-1.27574	-3.21276	4.07349
CON187	3	3	1	0.0241642	0.611025	-0.0271088
CON188	2	2	2	-0.432789	-0.741093	1.21839
CON189	3	3	1	0.0226163	0.587268	-0.0737145
CON190	3	3	1	0.0314272	0.678763	0.00782393
CON191	2	2	2	-0.456656	-0.820608	1.37671
CON192	3	3	1	-0.00627377	0.505795	-0.0490017
CON193	2	2	2	-0.373599	-0.528757	1.30506
CON194	3	3	1	0.0131123	0.569417	0.00953897
CON195	3	3	1	0.0237666	0.607457	-0.239594
CON196	3	3	1	-0.113363	0.238552	0.439391
CON197	3	3	1	-0.0775927	0.348639	0.252179
CON198	2	2	2	-0.504546	-0.902172	1.35132
CON199	3	3	1	-0.0197108	0.510708	0.0923025
CON200	3	3	1	-0.00367368	0.579366	-0.0672319
CON201	2	2	2	-0.292649	-0.289337	0.8527
CON202	3	3	1	-0.0490206	0.440417	0.0711612
CON203	3	3	1	0.0674538	0.798139	-0.194345
CON204	2	2	2	-0.388642	-0.594732	1.13516
CON205	3	3	1	-0.191914	0.0581073	0.662361
CON206	3	3	1	0.00631626	0.575414	-0.022038
CON207	3	3	1	-0.0170053	0.510481	-0.036214
CON208	2	2	2	-0.324725	-0.376832	1.08536
CON209	3	3	1	0.0577802	0.763442	0.126626
CON210	3	3	1	-0.0893003	0.296675	0.279723
CON211	3	3	1	-0.0196461	0.524203	0.00897308
CON212	3	3	1	0.0235973	0.651391	-0.146047
CON213	3	3	1	-0.00608635	0.511087	0.0804548
CON214	3	3	2	-0.229099	-0.0289272	0.775375
CON215	2	2	2	-0.448008	-0.731898	1.41696
CON216	1	1	3	-1.56206	-3.91302	4.79726
CON217	3	3	1	0.0401117	0.708161	-0.121128
CON218	3	3	1	-0.00886452	0.548196	0.0937857
CON219	2	2	2	-0.563194	-1.08687	1.42506
CON220	1	1	3	-1.22722	-3.04265	3.39685
CON221	2	2	2	-0.566609	-1.07785	1.58325
CON222	2	2	2	-0.475851	-0.794861	1.41423
CON223	2	2	2	-0.541867	-0.99398	1.49916
CON224	3	3	1	-0.0230759	0.517891	-0.105887
CON225	3	3	1	-0.00115966	0.581494	-0.0461957
CON226	3	3	1	-0.0060611	0.537249	-0.132046
CON227	2	2	2	-0.509256	-0.915362	1.39792
CON228	2	2	2	-0.437611	-0.658407	1.18703
CON229	3	3	1	0.0183914	0.636436	0.0232531
CON230	3	3	1	-0.0173867	0.49918	-0.0470154
CON231	3	3	1	0.0183094	0.645624	-0.11641
CON232	3	3	1	0.0209408	0.679078	-0.160282
CON233	2	2	2	-0.472032	-0.805754	1.37173
CON234	3	3	1	-0.00405052	0.562071	-0.0328038
CON235	2	2	2	-0.560227	-1.01443	1.57624
CON236	2	2	2	-0.302509	-0.283578	1.00448
CON237	2	2	2	-0.343499	-0.344033	1.13777
CON238	3	3	1	0.0185454	0.620326	-0.0606886
CON239	3	3	1	-0.18076	0.098699	0.54883
CON240	3	3	1	0.0392959	0.702378	0.0774977
CON241	3	3	1	0.049653	0.745783	-0.0670177
CON242	3	3	1	0.0638687	0.787797	-0.0315842
CON243	3	3	1	0.0834021	0.81615	-0.119245
CON244	2	2	2	-0.527315	-0.978936	1.62945
CON245	2	2	2	-0.326384	-0.329136	1.12584
CON246	3	3	1	0.0543429	0.743112	-0.0259606
CON247	2	2	2	-0.46952	-0.768005	1.33126
CON248	2	2	2	-0.45554	-0.700076	1.56318
CON249	3	3	1	0.0596451	0.763253	-0.0194635
CON250	3	3	1	0.0265703	0.669934	-0.020058
CON251	3	3	1	-0.0248263	0.49163	0.0728475
CON252	2	2	2	-0.529308	-0.970238	1.65382
CON253	2	2	2	-0.449168	-0.73368	1.26391
CON254	3	3	1	-0.0251575	0.488562	-0.0563435
CON255	3	3	1	-0.0136195	0.550762	0.00703547
CON256	2	2	2	-0.498579	-0.877638	1.47814
CON257	3	3	1	0.0170606	0.641126	-0.107786
CON258	3	3	1	0.00022549	0.603567	-0.082359
CON259	2	2	2	-0.42019	-0.609849	1.39883
CON260	3	3	1	0.0086696	0.596641	0.0796045
CON261	2	2	2	-0.515124	-0.945698	1.5649
CON262	2	2	2	-0.621118	-1.28662	1.71841
CON263	3	3	1	0.00495866	0.610824	-0.0628162
CON264	3	3	1	0.027063	0.637754	-0.11667
CON265	2	2	2	-0.407812	-0.603184	1.26642
CON266	3	3	1	0.0173199	0.64926	-0.136938
CON267	3	3	1	0.0069677	0.601526	0.025139
CON268	3	3	1	0.0427855	0.691577	-0.111714
CON269	3	3	1	0.0219701	0.64086	0.00145707
CON270	3	3	1	0.0600839	0.730585	-0.121253
CON271	3	3	1	-0.0171622	0.520505	0.0253712
CON272	3	3	1	-0.197776	0.0736674	0.538525
CON273	2	2	2	-0.350906	-0.431553	1.2383
CON274	2	2	2	-0.448654	-0.748395	1.60018
CON275	3	3	1	0.0709607	0.766213	-0.201125
CON276	3	3	1	-0.0257044	0.457185	-0.0594427
CON277	2	2	2	-0.421208	-0.627251	1.20051
CON278	3	3	1	-0.00445107	0.558309	0.098759
CON279	3	3	1	-0.00867646	0.533357	0.073378
CON280	1	1	3	-1.24289	-2.92624	3.78424
CON281	3	3	1	0.0147331	0.591904	-0.114087
CON282	3	3	1	0.00970777	0.609646	-0.0833011
CON283	2	2	2	-0.584475	-1.12013	1.61969
CON284	2	2	2	-0.450994	-0.715062	1.48924
CON285	2	2	2	-0.28307	-0.184639	1.04345
CON286	3	3	1	0.00134746	0.562369	0.149718
CON287	2	2	2	-0.540881	-1.00602	1.47672
CON288	2	2	2	-0.430997	-0.672885	1.26072
CON289	2	2	2	-0.31773	-0.301523	1.05158
CON290	2	2	2	-0.434937	-0.687583	1.26659
CON291	3	3	1	0.00643093	0.583874	-0.00892813
CON292	3	3	1	0.0257545	0.656115	-0.00506335
CON293	2	2	2	-0.480696	-0.825359	1.4653
CON294	1	1	3	-1.32255	-3.15022	4.13249
CON295	3	3	2	-0.24479	-0.0860741	0.814058
CON296	3	3	1	-0.00605521	0.559342	-0.0660247
CON297	2	2	2	-0.443875	-0.725385	1.21548
CON298	3	3	1	0.0300872	0.65904	-0.0532082
CON299	3	3	1	0.0164679	0.622342	0.0377224
CON300	3	3	1	0.0260102	0.659164	0.0374631
CON301	3	3	1	0.0184127	0.656082	0.0158324
CON302	2	2	2	-0.40309	-0.630526	1.29623
CON303	3	3	1	0.00955229	0.579981	0.0517044
CON304	3	3	1	0.0404586	0.714268	-0.00763216
CON305	3	3	1	0.036888	0.693136	-0.190122
CON306	3	3	1	0.00916169	0.63984	0.00364979
CON307	3	3	1	0.031695	0.693632	-0.0984606
CON308	3	3	1	0.00646454	0.607824	-0.00025376
CON309	3	3	1	-0.00169769	0.601203	0.0908217
CON310	3	3	1	-0.015126	0.538504	0.0987335
CON311	2	2	2	-0.575878	-1.11461	1.67652
CON312	3	3	1	-0.0195469	0.50252	-0.0445474
CON313	2	2	2	-0.582797	-1.14716	1.68976
CON314	3	3	1	0.0651798	0.783024	0.0393202
CON315	3	3	1	0.0892344	0.854241	-0.243106
CON316	3	3	1	0.0344331	0.681564	-0.0615187
CON317	2	2	2	-0.60276	-1.16175	1.62642
CON318	3	3	1	0.246558	1.12184	0.0519185
CON319	3	3	1	0.0673135	0.734075	-0.0793629
CON320	3	3	1	-0.0108194	0.569773	-0.084534
CON321	2	2	2	-0.592332	-1.17427	1.69604
CON322	3	3	1	-0.00131167	0.531344	0.127221
CON323	3	3	1	-0.00799278	0.536398	0.0741976
CON324	3	3	1	-0.00353014	0.567499	0.168681
CON325	2	2	2	-0.416779	-0.467113	1.35206
CON326	3	3	1	0.0141175	0.60926	-0.0634784
CON327	3	3	1	0.0442594	0.714321	0.0148726
CON328	3	3	1	-0.0177343	0.466953	-0.0125162
CON329	3	3	1	0.0183425	0.667311	-0.0695659
CON330	2	2	2	-0.293957	-0.302945	1.03929
CON331	3	3	1	-0.0126696	0.548348	0.163423
CON332	2	2	2	-0.38433	-0.518827	1.28401
CON333	2	2	2	-0.579167	-1.09338	1.7098
CON334	2	2	2	-0.317421	-0.318823	1.20163
CON335	3	3	1	0.00696709	0.578707	0.0974143
CON336	3	3	1	0.0193457	0.652808	0.341452
CON337	3	3	1	-0.152866	0.202102	0.436157
CON338	2	3	2	-0.27695	-0.16335	0.861491
CON339	3	3	1	0.0554743	0.728422	-0.0512906
CON340	2	2	2	-0.428722	-0.679717	1.32412
CON341	3	3	1	0.0102497	0.590935	0.181348
CON342	2	2	2	-0.40527	-0.585185	1.37667
CON343	3	3	1	0.00282817	0.57878	0.0971303
CON344	3	3	1	0.00923797	0.616302	0.179934
CON345	3	3	1	0.0170023	0.562212	-0.0756147
CON346	2	2	2	-0.344854	-0.395135	1.46364
CON347	2	2	2	-0.447336	-0.747873	1.3461
CON348	2	2	2	-0.75506	-1.47365	2.4068
CON349	3	3	1	0.049057	0.698878	-0.0394832
CON350	3	3	1	0.00770207	0.62908	0.060419
CON351	3	3	1	0.0237072	0.602255	-0.124214
CON352	3	3	1	0.0489632	0.725255	0.0381335
CON353	3	3	1	-0.0253559	0.493689	0.142596
CON354	3	3	1	-0.0458968	0.43344	0.194513
CON355	2	2	2	-0.443067	-0.744467	1.35985
CON356	2	2	2	-0.334914	-0.355009	1.28353
CON357	3	3	1	-0.00881588	0.559609	0.14645
CON358	3	3	1	0.026083	0.643611	-0.0753681
CON359	3	3	1	-0.0411212	0.414103	0.0115112
CON360	3	3	1	0.0428863	0.728797	-0.106441
CON361	3	3	1	-0.00764104	0.567827	0.0126817
CON362	3	3	1	-0.018251	0.504436	0.231189
CON363	2	2	2	-0.29006	-0.258677	0.902643
CON364	2	2	2	-0.391613	-0.581176	1.09647
CON365	3	3	1	0.0384955	0.713205	0.00660137
CON366	3	3	1	0.0152207	0.662381	-0.103609
CON367	3	3	1	-0.0111356	0.546475	0.159958
CON368	3	3	1	-0.00103016	0.594338	-0.143921
CON369	2	2	2	-0.381068	-0.467651	1.17734
CON370	3	3	1	-0.0158075	0.536446	0.0733605
CON371	3	3	1	-0.0156499	0.50497	0.222956
CON372	2	2	2	-0.327676	-0.396359	1.13094
CON373	3	3	1	0.00343918	0.598092	0.141871
CON374	2	2	2	-0.566722	-1.11456	1.50973
CON375	1	1	3	-1.97372	-5.17544	5.63101
CON376	3	3	1	-0.0170255	0.503214	0.00863442
CON377	3	3	1	-0.0257571	0.498234	0.158396
CON378	3	3	1	-0.01361	0.548366	0.153997
CON379	2	2	2	-0.420425	-0.609449	1.29367
CON380	2	2	2	-0.621173	-1.30818	1.83877
CON381	3	3	1	0.0519857	0.759538	-0.0185996
CON382	3	3	1	-0.00382684	0.581021	0.0657798
CON383	3	3	1	-0.031399	0.496909	-0.0019527
CON384	3	3	1	-0.00680038	0.571912	0.005927
CON385	3	3	1	-0.0287581	0.504	0.0339591
CON386	3	3	1	0.0379238	0.653702	0.108145
CON387	3	3	1	-0.0263949	0.454194	0.125914
CON388	3	3	1	0.0352099	0.694578	0.125252
CON389	2	2	2	-0.427073	-0.639064	1.51283
CON390	3	3	1	-0.0256714	0.470082	0.139481
CON391	3	3	1	-0.0021298	0.535545	-0.0579742
CON392	3	3	1	-0.0111104	0.502587	0.101808
CON393	2	2	2	-0.455856	-0.760502	1.45675
CON394	3	3	1	0.00945379	0.591702	0.0859266
CON395	2	2	2	-0.400999	-0.564084	1.31043
CON396	1	1	3	-1.51993	-3.82471	4.61361
CON397	2	2	2	-0.484326	-0.846096	1.48482
CON398	2	2	2	-0.397691	-0.572838	1.44799
CON399	3	3	1	-0.00945603	0.555091	0.0424316
CON400	3	3	1	-0.0219385	0.505991	0.0695675
CON401	3	3	1	-0.0466218	0.39307	0.119446
CON402	3	3	1	-0.0147896	0.515728	0.0159163
CON403	2	2	2	-0.422386	-0.668468	1.33629
CON404	3	3	1	-0.00450747	0.55791	0.189824
CON405	2	2	2	-0.31485	-0.386359	1.00753
CON406	3	3	1	-0.00936806	0.52903	0.00396243
CON407	2	2	2	-0.576507	-1.1358	1.67899
CON408	3	3	1	-0.00181376	0.59884	0.0543729
CON409	2	2	2	-0.633651	-1.28749	1.69378
CON410	3	3	1	-0.0185884	0.536614	0.0573898
CON411	2	2	2	-0.611871	-1.22988	1.84829
CON412	2	2	2	-0.516967	-0.91377	1.52321
CON413	3	3	1	0.0118245	0.615333	0.0316997
CON414	3	3	1	-0.0250993	0.495179	0.0688978
CON415	2	2	2	-0.603677	-1.19521	1.73873
CON416	3	3	1	-0.015069	0.530716	0.0314063
CON417	3	3	1	-0.0435724	0.447024	0.140053
CON418	2	2	2	-0.481148	-0.837192	1.46938
CON419	2	2	2	-0.442217	-0.740828	1.28699
CON420	3	3	1	-0.0481783	0.419984	0.084319
CON421	1	1	3	-2.36584	-6.36915	6.68115
CON422	3	3	1	-0.0389753	0.436213	0.00178947
CON423	2	2	2	-0.704006	-1.49804	1.97541
CON424	3	3	1	-0.0157368	0.510542	0.00176456
CON425	3	3	1	-0.0530055	0.412677	0.0593499
CON426	3	3	1	-0.0126545	0.543322	0.0697321
CON427	2	2	2	-0.594595	-1.20108	1.63061
CON428	3	3	1	-0.00965288	0.568528	-0.0908888
CON429	3	3	1	-0.00542948	0.559921	0.063735
CON430	2	2	2	-0.581881	-1.12395	1.66601
CON431	3	3	1	-0.0199247	0.543383	0.0825889
CON432	2	2	2	-0.636308	-1.33895	1.81698
CON433	2	2	2	-0.388256	-0.578186	1.25093
CON434	3	3	1	-0.0151143	0.564041	-0.0208167
CON435	3	3	1	-0.0409984	0.465559	0.0722161
CON436	2	2	2	-0.497598	-0.862924	1.45461
CON437	2	2	2	-0.481493	-0.80136	1.44961
CON438	3	3	1	-0.00262779	0.586024	-0.0246622
CON439	2	2	2	-0.585155	-1.14708	1.73459
CON440	3	3	1	0.0204205	0.615014	-0.0191746
CON441	3	3	1	-0.0267256	0.496185	0.0845734
CON442	3	3	1	0.00691184	0.629069	0.0775725
CON443	2	2	2	-0.452294	-0.730298	1.59942
CON444	3	3	1	-0.0121011	0.557017	0.0501321
CON445	2	2	2	-0.379856	-0.468892	1.27358
CON446	2	2	2	-0.382044	-0.530483	0.980298
CON447	3	3	1	0.00749006	0.654099	-0.000399575
CON448	1	1	3	-1.81645	-4.66071	5.16437
CON449	2	2	2	-0.398081	-0.551351	1.19609
CON450	2	2	2	-0.51947	-0.914419	1.5257
CON451	3	3	1	-0.011462	0.553369	-0.0886115
CON452	3	3	1	0.017978	0.677476	-0.0700751
CON453	3	3	1	-0.0166719	0.515962	-0.0559358
CON454	3	3	1	0.0153122	0.631599	0.0446428
CON455	3	3	1	-0.00849558	0.542763	-0.00554256
CON456	3	3	1	-0.0247519	0.537138	0.0516209
CON457	2	2	2	-0.3515	-0.380702	1.06333
CON458	3	3	1	-0.0095029	0.557421	0.00508526
CON459	1	1	3	-1.13688	-2.54181	3.84003
CON460	3	3	1	-0.00558521	0.564139	-0.0650429
CON461	3	3	1	0.0153576	0.624161	-0.115531
CON462	2	2	2	-0.435012	-0.636639	1.40901
CON463	2	2	2	-0.353578	-0.358693	1.0587
CON464	2	2	2	-0.406397	-0.59686	1.49397
CON465	3	3	1	0.0187351	0.641101	-0.0865795
CON466	3	3	1	0.0403345	0.722253	0.0119
CON467	3	3	1	-0.0145646	0.558141	-0.0540033

## Sheet: chr1_112490851_112509390
IDV	CNV genotype			Signal Intensity (log2 ratio)
	Raw	PCA	LDF	Raw	PCA	LDF
CASE1	2	2	2	0.00881866	0.086061	0.0886668
CASE2	2	2	2	-0.015894	0.028486	0.0170191
CASE3	3	3	1	0.670143	1.11924	-0.718986
CASE4	2	2	2	-0.025345	0.0266804	0.0601096
CASE5	1	1	3	-2.03999	-2.97342	2.64741
CASE6	2	2	2	0.0835622	0.202851	0.0602651
CASE7	2	2	2	-0.0130555	0.0389114	0.0203899
CASE8	2	2	2	-0.0057188	0.0406851	0.00821182
CASE9	3	3	1	0.590405	0.969274	-0.757196
CASE10	1	1	3	-1.76667	-2.55347	2.48588
CASE11	3	3	1	0.670955	1.12256	-0.693927
CASE12	1	1	3	-1.95908	-2.84423	2.55663
CASE13	1	1	3	-1.88325	-2.7207	2.52316
CASE14	3	3	1	0.611505	1.02036	-0.673584
CASE15	3	3	1	0.680455	1.12595	-0.705115
CASE16	2	2	2	-0.024275	0.032452	0.0776771
CASE17	2	2	2	0.0033703	0.0500503	0.0206791
CASE18	1	1	3	-1.34698	-1.90097	2.15353
CASE19	2	2	2	0.0117695	0.0752969	0.0499213
CASE20	3	3	1	0.370914	0.642996	-0.570914
CASE21	2	2	2	0.043949	0.164483	0.109228
CASE22	2	2	2	-0.008676	0.0505111	0.00583119
CASE23	3	3	1	0.368645	0.647245	-0.663327
CASE24	2	2	2	-0.0280925	0.0302238	0.139238
CASE25	2	2	2	-0.0222667	0.0308279	-0.0176519
CASE26	1	1	3	-1.43246	-2.01603	2.34263
CASE27	3	3	1	0.545462	0.899793	-0.62864
CASE28	2	2	2	-0.0394992	0.0283063	0.0567506
CASE29	2	2	2	-0.0274494	-0.0141103	0.0298112
CASE30	2	2	2	-0.0531879	-0.0256908	0.02578
CASE31	1	1	3	-1.93122	-2.81407	2.58216
CASE32	1	1	3	-2.0312	-2.95682	2.37503
CASE33	2	2	2	0.0150856	0.0948066	-0.0147613
CASE34	1	1	3	-1.89918	-2.74878	2.79293
CASE35	1	1	3	-1.67005	-2.42644	2.15614
CASE36	1	1	3	-1.38123	-2.01356	2.5117
CASE37	3	3	1	0.471261	0.76227	-0.683526
CASE38	3	3	1	0.622966	1.01663	-0.779143
CASE39	3	3	1	0.497447	0.803123	-0.662096
CASE40	2	2	2	0.0203904	0.0443033	0.154636
CASE41	3	3	1	0.376189	0.619556	-0.675594
CASE42	1	1	3	-1.30541	-1.87205	2.28635
CASE43	3	3	1	0.566402	0.940295	-0.677927
CASE44	2	2	2	0.0471988	0.122717	0.126297
CASE45	2	2	2	0.027259	0.0831854	-0.136415
CASE46	2	2	2	0.114986	0.225997	0.0238445
CASE47	3	3	1	0.473875	0.811377	-0.5612
CASE48	2	2	2	0.00579042	0.0400194	0.0575133
CASE49	2	2	2	-0.0142943	0.0139858	-0.0689025
CASE50	3	3	1	0.494202	0.818034	-0.545594
CASE51	2	2	2	-0.0276624	-0.00261658	-0.00889794
CASE52	2	2	2	0.0290234	0.121091	0.0843962
CASE53	2	2	2	-0.0418614	-0.019887	0.153705
CASE54	1	1	3	-0.80763	-1.09505	1.89342
CASE55	2	2	2	-0.00223773	0.0616941	0.140748
CASE56	2	2	2	-0.0689211	-0.0417483	0.158135
CASE57	2	2	2	0.0233935	0.0840125	0.0546582
CASE58	2	2	2	0.00444401	0.0395874	0.0699247
CASE59	2	2	2	0.0200679	0.0956482	0.0445346
CASE60	2	2	2	-0.0289409	0.0173222	0.126895
CASE61	2	2	2	0.0885489	0.199378	-0.00280014
CASE62	1	1	3	-1.11191	-1.55598	2.322
CASE63	2	2	2	0.00815936	0.0767236	0.0328153
CASE64	2	2	2	0.000344367	0.0530242	0.0768738
CASE65	3	3	1	0.561035	0.931134	-0.60927
CASE66	2	2	2	-0.00641972	0.039934	-0.0524398
CASE67	1	1	3	-1.49403	-2.13211	2.37833
CASE68	1	1	3	-0.812168	-1.13067	1.88998
CASE69	3	3	1	0.555228	0.895081	-0.691403
CASE70	1	1	3	-1.52474	-2.22585	2.50805
CASE71	1	1	3	-1.6611	-2.41282	2.64625
CASE72	3	3	1	0.62818	1.00845	-0.752043
CASE73	3	3	1	0.689138	1.13628	-0.698137
CASE74	2	2	2	-0.000774907	0.049708	0.0397671
CASE75	2	2	2	0.0301019	0.111133	-0.054104
CASE76	1	1	3	-1.62152	-2.34414	2.27293
CASE77	3	3	1	0.556962	0.903174	-0.629731
CASE78	3	3	1	0.589031	0.963298	-0.608169
CASE79	3	3	1	0.380654	0.636582	-0.498966
CASE80	1	1	3	-2.05251	-3.03285	2.46064
CASE81	2	2	2	0.0130244	0.0160678	0.00562718
CASE82	1	1	3	-1.05611	-1.44322	2.02666
CASE83	1	1	3	-1.155	-1.58502	2.3346
CASE84	1	1	3	-0.767576	-1.04263	1.57811
CASE85	2	2	3	-0.707644	-0.949737	1.61223
CASE86	3	3	1	0.34383	0.600992	-0.574925
CASE87	2	2	2	0.0010143	0.0700888	0.103263
CASE88	2	2	2	0.0015445	0.0318565	0.0401757
CASE89	2	2	2	-0.0132199	0.0271842	0.0293286
CASE90	2	2	2	0.0349491	0.10726	0.045597
CASE91	3	3	1	0.427525	0.684701	-0.592792
CASE92	3	3	1	0.386952	0.610322	-0.520111
CASE93	2	2	2	-0.012541	0.0278553	-0.0062345
CASE94	2	2	2	-0.0332523	0.0287567	0.0815448
CASE95	1	1	3	-1.46315	-2.09533	2.27076
CASE96	3	3	1	0.368276	0.644065	-0.478557
CASE97	2	2	2	0.00220025	0.0714277	0.00987867
CASE98	2	2	2	-0.0182267	0.0380709	-0.0126276
CASE99	2	2	2	0.0303847	0.119066	0.0918984
CASE100	1	1	3	-1.73328	-2.50815	2.50109
CASE101	3	3	1	0.521299	0.849412	-0.75489
CASE102	2	2	2	-0.00620665	0.0702303	0.0149398
CASE103	1	1	3	-1.87974	-2.7394	2.2214
CASE104	2	2	2	0.03197	0.136477	0.143837
CASE105	2	2	2	0.00688701	0.0606551	-0.025744
CASE106	2	2	2	0.0810818	0.207976	0.0439167
CASE107	3	3	1	0.666815	1.10876	-0.692009
CASE108	3	3	1	0.557795	0.892795	-0.622984
CASE109	3	3	1	0.594091	0.952224	-0.763952
CASE110	2	2	2	0.000536621	0.0564021	0.0703377
CASE111	2	2	2	0.0558947	0.142701	0.109876
CASE112	2	2	2	0.00878563	0.0991158	-0.0388047
CASE113	3	3	1	0.557976	0.895906	-0.724532
CASE114	3	3	1	0.649558	1.04402	-0.787333
CASE115	2	2	2	0.0100228	0.0911245	-0.0388083
CASE116	2	2	2	0.0138695	0.0925034	-0.080028
CASE117	2	2	2	-0.0405434	-0.0229327	0.0178969
CASE118	3	3	1	0.616543	0.985275	-0.6111
CASE119	2	2	2	-0.0214714	0.00396019	-0.0188899
CASE120	3	3	1	0.519575	0.822278	-0.572718
CASE121	2	2	2	-0.0108572	0.0189602	-0.0635695
CASE122	1	1	3	-1.58161	-2.27118	2.45308
CASE123	2	2	2	-0.00872003	0.0333376	0.0527179
CASE124	2	2	2	0.099938	0.250923	0.0063079
CASE125	2	2	2	0.0139338	0.0833489	0.00746487
CASE126	2	2	2	-0.0275227	0.0482157	0.0571327
CASE127	1	1	3	-1.63125	-2.38083	2.54296
CASE128	3	3	1	0.628891	1.04137	-0.650501
CASE129	3	3	1	0.491326	0.828726	-0.552168
CASE130	2	2	2	0.0820747	0.178508	-0.0678335
CASE131	3	3	1	0.532182	0.871981	-0.623436
CASE132	2	2	2	-0.000812929	0.0614104	0.0299889
CASE133	3	3	1	0.422836	0.719022	-0.617842
CASE134	2	2	2	0.0276857	0.0864372	0.0255907
CASE135	2	2	2	0.0541486	0.207051	0.199253
CASE136	3	3	1	0.585857	0.97078	-0.708034
CASE137	1	1	3	-1.19232	-1.67412	2.54027
CASE138	3	3	1	0.525584	0.870607	-0.679245
CASE139	3	3	1	0.61497	1.01003	-0.693423
CASE140	3	3	1	0.684783	1.14399	-0.723038
CASE141	2	2	2	0.0902962	0.218866	0.00388873
CASE142	1	1	3	-1.1019	-1.53225	2.09414
CASE143	1	1	3	-1.54777	-2.20533	2.40129
CASE144	2	2	2	-0.000147539	0.0577424	0.0288596
CASE145	3	2	1	0.316506	0.520577	-0.444363
CASE146	3	3	1	0.485743	0.79074	-0.695984
CASE147	2	2	2	0.0301914	0.0985894	0.0167373
CASE148	3	3	1	0.636877	1.07832	-0.67616
CASE149	3	3	1	0.632642	1.02949	-0.659385
CASE150	2	2	2	0.00315099	0.0639851	0.0235474
CASE151	2	2	2	0.0125941	0.0643959	0.0369702
CASE152	2	2	2	0.0233526	0.0975766	0.0652664
CASE153	3	3	1	0.574083	0.954394	-0.736034
CASE154	2	2	2	0.0483513	0.112308	0.0451826
CASE155	2	2	2	0.0848814	0.20262	0.0605826
CASE156	1	1	3	-1.02353	-1.41481	2.09058
CASE157	2	2	2	0.0170983	0.0749108	0.0503517
CASE158	3	3	1	0.4827	0.796703	-0.537491
CASE159	1	1	3	-1.08878	-1.51312	2.20651
CASE160	1	1	3	-1.30322	-1.85194	2.02114
CASE161	3	3	1	0.490042	0.800484	-0.547377
CASE162	1	1	3	-1.10367	-1.52862	2.28428
CASE163	1	1	3	-0.818872	-1.13143	1.91228
CASE164	2	2	2	0.016799	0.0900004	0.107506
CASE165	1	1	3	-1.51395	-2.16562	2.19004
CASE166	2	2	2	-0.00870789	0.0513059	0.0716262
CASE167	2	2	2	0.0730073	0.200103	0.0401255
CASE168	1	1	3	-1.47719	-2.09627	2.07969
CASE169	2	2	2	-0.0052943	0.0432626	0.00479355
CASE170	2	2	2	-0.0124214	0.0653531	0.0713907
CASE171	2	2	2	-0.0114244	0.079863	0.0316317
CASE172	2	2	2	5.88074e-05	0.0512623	0.0524321
CASE173	2	2	2	-0.0106464	0.0729468	-0.0444112
CASE174	3	3	1	0.525204	0.908047	-0.653787
CASE175	3	3	1	0.328387	0.556939	-0.434362
CASE176	1	1	3	-1.4131	-2.04165	2.41219
CASE177	2	2	2	-0.0327748	0.00756261	0.139737
CASE178	2	2	2	0.00318055	0.0600888	0.0272405
CASE179	3	3	1	0.448014	0.735417	-0.760384
CASE180	2	2	2	0.0276199	0.100245	0.0293416
CASE181	3	3	1	0.46593	0.761723	-0.642676
CASE182	3	3	1	0.365476	0.592504	-0.587364
CASE183	2	2	2	-0.00786096	0.0621206	0.0828754
CASE184	2	2	2	0.00156888	0.0240997	-0.017489
CASE185	2	2	2	0.203014	0.379267	-0.305518
CASE186	2	2	2	0.0101161	0.0811259	0.0889593
CASE187	3	3	1	0.521111	0.830676	-0.74703
CASE188	2	2	2	0.00686629	0.0773647	-0.0503154
CASE189	2	2	2	0.0593022	0.163163	0.145609
CASE190	2	2	2	0.0781138	0.173758	0.10728
CASE191	2	2	2	-0.0144525	0.0472249	0.0840252
CASE192	1	1	3	-1.11061	-1.51159	2.22126
CASE193	3	3	1	0.516595	0.850723	-0.684013
CASE194	3	3	1	0.532858	0.872135	-0.606569
CASE195	2	2	2	-0.00453066	0.0681134	-0.0284608
CASE196	2	2	2	-0.0201823	0.0261331	0.00710103
CASE197	2	2	2	0.0672731	0.21065	0.0250705
CASE198	3	3	1	0.41361	0.698678	-0.603349
CASE199	1	1	3	-1.08264	-1.47552	2.32603
CASE200	2	2	2	-0.0241105	0.0402359	0.053417
CASE201	3	3	1	0.672253	1.12178	-0.633804
CASE202	2	2	2	-0.0277877	-0.00976005	-0.0258432
CASE203	3	3	1	0.413679	0.721983	-0.754303
CASE204	2	2	2	-0.0418312	0.0135809	-0.0498134
CASE205	2	2	2	0.0513681	0.141885	0.0609027
CASE206	3	3	1	0.571211	0.942774	-0.626144
CASE207	2	2	2	-0.0410263	-0.0173635	-0.0398969
CASE208	2	2	2	-0.0522825	-0.0222467	0.0499516
CASE209	3	3	1	0.459778	0.755184	-0.742797
CASE210	1	1	3	-0.947263	-1.33657	1.60791
CASE211	1	1	3	-0.90943	-1.2361	2.09262
CASE212	2	2	2	0.134365	0.273753	-0.303475
CASE213	2	2	2	0.0102501	0.071876	0.0250099
CASE214	2	2	1	0.270148	0.478428	-0.667733
CASE215	3	3	1	0.376396	0.636281	-0.485994
CASE216	3	3	1	0.494377	0.830414	-0.551876
CASE217	3	3	1	0.597402	0.969375	-0.735283
CASE218	3	3	1	0.362547	0.577489	-0.728639
CASE219	3	3	1	0.526118	0.86999	-0.750709
CASE220	2	2	2	-0.0408632	-0.0107741	0.0602229
CASE221	2	2	2	-0.0198612	0.032639	-0.0304343
CASE222	2	2	2	-0.00185997	0.0602895	-0.0548903
CASE223	2	2	2	-0.016912	0.0464873	0.0789096
CASE224	3	3	1	0.393386	0.61946	-0.75164
CASE225	3	3	1	0.6528	1.06045	-0.717974
CASE226	3	3	1	0.632032	1.03682	-0.698335
CASE227	1	1	3	-1.65927	-2.42574	2.38681
CASE228	2	2	2	-0.00571952	0.0331214	-0.0206694
CASE229	1	1	3	-1.57485	-2.25527	2.52828
CASE230	3	3	1	0.606775	0.985163	-0.792312
CASE231	2	2	2	0.0870542	0.203701	-0.000721638
CASE232	2	2	2	-0.0274749	0.0228686	-0.0134753
CASE233	3	3	1	0.553233	0.931291	-0.736964
CASE234	2	2	2	-0.00412852	0.038111	0.00137841
CASE235	2	2	2	0.0965636	0.221628	-0.00612769
CASE236	2	2	2	-0.00861242	0.0535496	-0.0180292
CASE237	3	3	1	0.512019	0.823041	-0.678285
CASE238	1	1	3	-1.73458	-2.51374	2.7762
CASE239	2	2	2	-0.0329525	0.0250323	0.13955
CASE240	2	2	2	-0.0117105	0.047602	0.0372678
CASE241	1	1	3	-1.96011	-2.85361	2.46503
CASE242	2	2	2	-0.04503	0.0250375	0.0589654
CASE243	1	1	3	-1.61842	-2.33556	2.36518
CASE244	1	1	3	-0.888064	-1.21821	2.07833
CASE245	3	3	1	0.50741	0.834643	-0.460202
CASE246	3	3	1	0.605658	1.01542	-0.692271
CASE247	2	2	2	-0.0110218	0.0256049	-0.0264429
CASE248	2	2	2	-0.0303566	-0.00642858	0.0412491
CASE249	3	3	1	0.590386	0.982814	-0.700633
CASE250	1	1	3	-0.846042	-1.15259	1.98492
CASE251	2	2	2	0.142862	0.289315	-0.00693601
CASE252	1	1	3	-1.21189	-1.72357	2.48221
CASE253	2	2	2	-0.0236223	0.0293669	0.0108098
CASE254	3	3	1	0.675103	1.12227	-0.746545
CASE255	2	2	2	-0.0875643	-0.0799284	0.084017
CASE256	2	2	2	0.00551907	0.073912	0.0656128
CASE257	2	2	2	-0.013814	0.0527237	0.0164822
CASE258	3	3	1	0.48787	0.820579	-0.651385
CASE259	1	1	3	-1.06042	-1.47221	1.91667
CASE260	2	2	2	0.0840473	0.199803	0.0801326
CASE261	2	2	2	0.118302	0.220225	-0.0586234
CASE262	2	2	2	-0.02656	0.0126729	0.0208341
CASE263	3	3	1	0.554161	0.932812	-0.623964
CASE264	2	2	2	-0.0221487	0.00632575	0.00795884
CASE265	3	3	1	0.597826	0.968988	-0.700788
CASE266	2	2	2	0.00332825	0.0611094	0.0533304
CASE267	2	2	2	0.0140748	0.0850958	0.0567501
CASE268	3	3	1	0.42435	0.709815	-0.657339
CASE269	2	2	2	-0.0151561	0.0180846	-0.0886119
CASE270	2	2	2	0.110141	0.221174	0.0646479
CASE271	2	2	2	0.0557453	0.157729	0.0705491
CASE272	2	2	2	-0.0418825	0.00874575	0.0927781
CASE273	3	3	1	0.387684	0.663038	-0.670373
CASE274	3	3	1	0.526153	0.852835	-0.741805
CASE275	1	1	3	-1.25358	-1.77397	2.29739
CASE276	2	2	2	-0.000664449	0.0362039	0.117598
CASE277	2	2	2	0.0871552	0.221552	-0.0874969
CASE278	2	2	2	-0.0474262	0.017809	0.00547797
CASE279	2	2	2	0.0915809	0.191547	-0.047497
CASE280	3	3	1	0.518506	0.848664	-0.545579
CASE281	1	1	3	-0.855962	-1.19296	2.00781
CASE282	2	2	2	-0.0185587	0.0465059	-0.0251979
CASE283	1	1	3	-1.18505	-1.67634	2.17695
CASE284	1	1	3	-0.795506	-1.10877	1.72218
CASE285	3	3	1	0.366738	0.70779	-0.518164
CASE286	2	2	2	-0.00516857	0.0555416	0.0164115
CASE287	1	1	3	-1.24846	-1.73651	2.36296
CASE288	2	2	2	0.106815	0.235631	0.0283706
CASE289	1	1	3	-1.77182	-2.54704	2.6461
CASE290	2	2	2	0.0579787	0.185942	-0.0379143
CASE291	2	2	1	0.291078	0.522802	-0.43517
CASE292	1	1	3	-1.95645	-2.8402	2.57421
CASE293	2	2	2	-0.0102202	0.0362203	-0.0345222
CASE294	2	2	2	-0.010399	0.0464985	0.0829864
CASE295	2	2	2	0.00328343	0.100311	0.0987293
CASE296	2	2	2	0.0967621	0.223867	-0.0178323
CASE297	1	1	3	-1.93066	-2.81254	2.44184
CASE298	1	1	3	-1.58608	-2.23961	2.34478
CASE299	3	3	1	0.584233	0.980665	-0.819658
CASE300	1	1	3	-1.04975	-1.44307	2.12984
CASE301	2	2	2	0.0236148	0.104811	0.0324738
CASE302	3	3	1	0.679294	1.10776	-0.632963
CASE303	3	3	1	0.610072	0.983572	-0.598122
CASE304	2	2	2	0.00713567	0.0676167	0.0486161
CASE305	2	2	2	0.0291815	0.11934	0.0410562
CASE306	1	1	3	-1.65244	-2.39567	2.16878
CASE307	1	1	3	-1.50406	-2.13659	2.3852
CASE308	3	3	1	0.473175	0.768145	-0.609665
CASE309	1	1	3	-1.37082	-1.91538	2.42966
CASE310	1	1	3	-1.59137	-2.26697	2.4354
CASE311	2	2	2	0.110244	0.234629	0.00260584
CASE312	2	2	2	-0.0156296	0.0318613	0.112285
CASE313	2	2	2	0.0735131	0.191665	-0.0261364
CASE314	3	3	1	0.530482	0.892537	-0.676051
CASE315	2	2	2	-0.0577843	-0.0124699	-0.147465
CASE316	3	3	1	0.515694	0.869334	-0.49104
CASE317	2	2	2	-0.0198646	0.00805839	-0.0126841
CASE318	3	3	1	0.455275	0.759996	-0.638088
CASE319	2	2	2	-0.0657661	-0.0211771	-0.0283926
CASE320	1	1	3	-0.844674	-1.18575	1.6729
CASE321	2	2	2	0.0347335	0.0968274	0.0354614
CASE322	2	2	2	0.0155419	0.0954276	0.0904767
CASE323	3	3	1	0.528244	0.891944	-0.618608
CASE324	3	3	1	0.644594	1.06427	-0.723113
CASE325	2	2	2	-0.0211393	0.018262	0.0706277
CASE326	1	1	3	-0.866392	-1.21952	1.89772
CASE327	3	3	1	0.626352	1.00791	-0.669127
CASE328	3	3	1	0.688571	1.12438	-0.753501
CASE329	3	3	1	0.729103	1.22167	-0.761451
CASE330	2	2	2	0.108773	0.229455	0.0626761
CASE331	2	2	2	0.130074	0.254965	0.104537
CASE332	2	2	2	-0.00979304	0.0410488	0.0539065
CASE333	3	3	1	0.594638	0.96267	-0.677907
CASE334	2	2	2	0.0258613	0.139048	-0.0573277
CASE335	1	1	3	-1.96144	-2.86386	2.40699
CASE336	3	3	1	0.40467	0.637582	-0.692467
CASE337	2	2	2	-0.0206224	0.03704	-0.020291
CASE338	2	2	2	0.0789249	0.195392	0.0421541
CASE339	2	2	2	-0.0316791	0.0152448	0.00657475
CASE340	1	1	3	-1.81821	-2.60739	2.75902
CASE341	2	2	2	-0.0216285	0.0258728	0.0689389
CASE342	2	2	2	-0.00552436	0.0379556	0.0344645
CASE343	3	3	1	0.404463	0.663033	-0.667347
CASE344	2	2	2	-0.032091	0.00861652	-0.00276831
CASE345	2	2	2	0.00853586	0.0651612	0.00173771
CASE346	1	1	3	-0.978705	-1.38098	1.9018
CASE347	2	2	2	0.0813101	0.186732	0.0216367
CASE348	2	2	2	0.0657083	0.150538	0.0154815
CASE349	3	3	1	0.548261	0.911912	-0.832086
CASE350	3	3	1	0.584201	0.975763	-0.71115
CASE351	2	2	2	-0.00245512	0.0450394	-0.0089645
CASE352	2	2	2	3.63566e-05	0.0442485	-0.00606194
CASE353	1	1	3	-1.34634	-1.93285	2.49433
CASE354	3	3	1	0.593962	0.989266	-0.684702
CASE355	3	3	1	0.617254	1.01849	-0.665776
CASE356	3	3	1	0.623674	1.0279	-0.670051
CASE357	1	1	3	-1.21514	-1.74632	1.78933
CASE358	3	3	1	0.642427	1.05583	-0.738136
CASE359	3	3	1	0.546036	0.895716	-0.683315
CASE360	1	1	3	-1.53938	-2.20594	2.22971
CASE361	2	2	2	-0.00544339	0.0368457	0.101532
CASE362	2	2	2	-0.0328908	0.0143302	0.047894
CASE363	1	1	3	-1.61158	-2.29001	2.34296
CASE364	3	3	1	0.613563	1.00852	-0.738139
CASE365	1	1	3	-1.15756	-1.61418	2.17824
CASE366	2	2	2	0.093891	0.217362	0.0227088
CASE367	2	2	2	-0.0285027	0.0148974	0.0201432
CASE368	3	3	1	0.576404	0.928623	-0.737204
CASE369	2	2	2	-0.0214963	0.0459657	0.0713519
CASE370	2	2	2	0.0746143	0.194273	0.0675126
CASE371	3	3	1	0.574014	0.937402	-0.626696
CON1	3	3	1	0.512989	0.875219	-0.632542
CON2	3	3	1	0.604649	0.995508	-0.676415
CON3	2	2	2	-0.0220186	0.00139884	0.0384956
CON4	1	1	3	-1.55891	-2.23024	2.44319
CON5	2	2	2	-0.0233367	0.0135083	0.0894777
CON6	2	2	2	-0.0521104	-0.00720443	0.0104247
CON7	3	3	1	0.614564	1.02249	-0.721834
CON8	3	3	1	0.542251	0.89525	-0.700694
CON9	2	2	2	-0.0100987	0.0374806	0.0517857
CON10	3	3	1	0.638794	1.03613	-0.691277
CON11	3	3	1	0.591511	0.96478	-0.6279
CON12	2	2	2	-0.0317001	-0.00439347	0.0183279
CON13	2	2	2	0.126807	0.233464	0.0672166
CON14	3	3	1	0.617116	1.00919	-0.62318
CON15	2	2	2	0.0685437	0.171326	0.0562125
CON16	2	2	2	0.0651272	0.164039	0.0331218
CON17	3	3	1	0.647309	1.05256	-0.727876
CON18	1	1	3	-1.76418	-2.55964	2.57729
CON19	3	3	1	0.583111	0.962664	-0.741688
CON20	2	2	2	-0.0132438	0.0278471	0.0407441
CON21	1	1	3	-1.19357	-1.7419	2.13286
CON22	2	2	2	-0.00343101	0.0644964	-0.0489323
CON23	3	3	1	0.705602	1.18777	-0.789925
CON24	1	1	3	-1.88852	-2.75883	2.69581
CON25	2	2	2	-0.0737096	-0.0644185	-0.0437319
CON26	2	2	2	-0.0492505	-0.0257492	0.057384
CON27	2	2	2	0.0307617	0.0919688	0.149976
CON28	2	2	2	-0.0302838	0.00921947	-0.0169563
CON29	3	3	1	0.524986	0.88963	-0.654764
CON30	2	2	2	-0.0839236	-0.0996968	-0.0847906
CON31	3	3	1	0.59798	0.950692	-0.954893
CON32	2	2	2	-0.00427458	0.0951087	-0.0640791
CON33	3	3	1	0.459885	0.806604	-0.68313
CON34	2	2	2	0.00619405	0.0848744	0.0128261
CON35	1	1	3	-1.12539	-1.56792	2.23015
CON36	2	2	2	0.00819627	0.0927042	0.0355772
CON37	3	3	1	0.601747	0.982533	-0.671612
CON38	3	3	1	0.603405	1.00441	-0.626364
CON39	2	2	2	-0.0568766	0.0168879	-0.0224838
CON40	3	3	1	0.576808	0.93547	-0.67419
CON41	2	2	2	-0.0416175	-0.0271922	-0.0233923
CON42	2	2	2	-0.0390846	-0.0195194	0.0365951
CON43	2	2	2	-0.0241669	0.0306596	0.0351656
CON44	3	3	1	0.512543	0.803479	-0.646633
CON45	1	1	3	-1.60079	-2.31959	2.5882
CON46	1	1	3	-1.25294	-1.78157	2.31499
CON47	2	2	2	0.025408	0.0831457	-0.101144
CON48	2	2	2	0.0189223	0.0991308	0.0670507
CON49	3	3	1	0.596456	0.978268	-0.632474
CON50	2	2	2	-0.0155394	0.0348677	-0.0259092
CON51	3	3	1	0.606505	0.968117	-0.722305
CON52	1	1	3	-1.26873	-1.79589	2.31363
CON53	1	1	3	-1.03731	-1.44336	2.28867
CON54	3	3	1	0.371127	0.595682	-0.500539
CON55	3	3	1	0.609592	0.984522	-0.713111
CON56	3	3	1	0.659047	1.09467	-0.700074
CON57	2	2	2	-0.0223208	0.00300189	0.0631265
CON58	3	3	1	0.567657	0.94186	-0.723301
CON59	2	2	2	0.029619	0.112129	0.127853
CON60	3	3	1	0.419426	0.704146	-0.606645
CON61	3	3	1	0.463357	0.758238	-0.68904
CON62	2	2	2	0.0118827	0.0535305	0.0202368
CON63	3	3	1	0.522252	0.854604	-0.75801
CON64	3	3	1	0.535183	0.874305	-0.672689
CON65	1	1	3	-1.66503	-2.3949	2.72819
CON66	2	2	2	0.100185	0.219193	0.0395018
CON67	1	1	3	-1.30265	-1.84925	2.39169
CON68	3	3	1	0.53042	0.866803	-0.660947
CON69	2	2	2	0.0441246	0.12957	-0.0175191
CON70	3	3	1	0.605526	0.995233	-0.574925
CON71	2	2	2	0.0916279	0.206237	0.0189018
CON72	3	3	1	0.641983	1.05554	-0.634015
CON73	2	2	2	-0.0109246	0.0302056	-0.0144155
CON74	2	2	2	0.0338438	0.103942	-0.00443777
CON75	3	3	1	0.341662	0.574437	-0.648777
CON76	1	1	3	-0.937381	-1.31023	1.96748
CON77	2	2	2	-0.0296117	0.0818879	0.0893073
CON78	3	3	1	0.674608	1.12536	-0.637816
CON79	2	2	2	0.0600859	0.17836	-0.0837735
CON80	2	2	2	0.107123	0.207743	-0.00454331
CON81	2	2	2	0.0996773	0.216919	-0.0475178
CON82	3	3	1	0.377052	0.596467	-0.447407
CON83	2	2	2	-0.0218954	0.0284883	0.0799573
CON84	2	2	2	0.0225712	0.0852386	0.102629
CON85	3	3	1	0.595086	0.972307	-0.648297
CON86	3	3	1	0.523925	0.85939	-0.691183
CON87	2	2	2	0.0846942	0.201257	-0.0271328
CON88	3	3	1	0.624585	1.03776	-0.726898
CON89	2	2	2	-0.0265117	0.0205915	0.00550978
CON90	2	2	2	-0.0444803	-0.00535128	0.0106372
CON91	3	3	1	0.584828	0.966068	-0.688146
CON92	2	2	2	-0.0388666	-0.00399119	0.0808318
CON93	2	2	2	-0.0328204	0.016794	0.0451303
CON94	2	2	2	-0.0521203	-0.0280317	0.0550526
CON95	2	2	2	-0.0516549	-0.0227284	0.077076
CON96	2	2	2	-0.0261084	0.0231685	-0.11905
CON97	2	2	2	-0.0591663	-0.0379259	0.0389762
CON98	2	2	2	-0.0454679	0.00328444	0.00637602
CON99	2	2	2	-0.039644	-0.0155956	0.0177045
CON100	1	1	3	-1.76451	-2.53669	2.51446
CON101	1	1	3	-2.04141	-3.01067	2.37123
CON102	2	2	2	-0.0594866	-0.0798089	0.125522
CON103	2	2	2	-0.0154119	0.0663638	0.209714
CON104	1	1	3	-0.962717	-1.33166	2.06212
CON105	2	2	2	-0.0369078	-0.00390188	0.0754621
CON106	2	2	2	-0.0109529	0.0416576	-0.019376
CON107	2	2	2	-0.00597653	0.0424615	-0.0783491
CON108	3	3	1	0.675428	1.09126	-0.665377
CON109	3	3	1	0.602487	0.982304	-0.75274
CON110	2	2	2	-0.0265766	0.0262583	0.111274
CON111	2	2	2	-0.0221806	0.0362815	0.112136
CON112	3	3	1	0.451043	0.740509	-0.52369
CON113	2	2	2	0.0334684	0.106165	-0.0653639
CON114	3	3	1	0.558459	0.886239	-0.823162
CON115	3	3	1	0.551314	0.915345	-0.74508
CON116	2	2	2	-0.00452018	0.0497042	0.0524412
CON117	3	3	1	0.670175	1.10618	-0.719972
CON118	2	2	2	-0.00847941	0.0634075	0.0578613
CON119	2	2	2	-0.0163255	0.0186848	-0.0118672
CON120	3	3	1	0.603136	0.982746	-0.663149
CON121	2	2	2	0.0944531	0.197565	0.0147699
CON122	3	3	1	0.453926	0.801423	-0.592246
CON123	3	3	1	0.42945	0.728681	-0.570922
CON124	3	3	1	0.538583	0.902109	-0.633208
CON125	2	2	2	-0.0353765	-0.00134164	0.0863782
CON126	2	2	2	0.00668004	0.0866116	0.100186
CON127	2	2	3	-0.640302	-0.865623	1.47057
CON128	2	2	2	-0.016182	0.0437592	0.0952278
CON129	3	3	1	0.517295	0.871343	-0.60024
CON130	2	2	2	-0.00989444	0.0259998	-0.0472242
CON131	3	3	1	0.543347	0.879932	-0.689647
CON132	2	2	2	0.0224451	0.0752554	0.028404
CON133	2	2	2	-0.0310298	0.01119	-0.00358125
CON134	1	1	3	-1.62526	-2.3266	2.18516
CON135	2	2	2	0.0530081	0.172825	0.141349
CON136	2	2	2	0.0211145	0.10279	0.0107543
CON137	2	2	2	-0.0357076	0.0438537	0.0917658
CON138	3	3	1	0.476958	0.792764	-0.561678
CON139	1	1	3	-1.19608	-1.70906	2.49076
CON140	3	3	1	0.503621	0.820172	-0.639261
CON141	2	2	2	0.0973262	0.196387	0.0349656
CON142	2	2	2	0.0253319	0.0883166	0.0157969
CON143	3	3	1	0.531904	0.864048	-0.681775
CON144	3	3	1	0.478635	0.7935	-0.618571
CON145	3	3	1	0.56906	0.929005	-0.793187
CON146	1	1	3	-1.17295	-1.63181	2.31246
CON147	2	2	2	0.0863441	0.209734	0.133782
CON148	3	3	1	0.421559	0.728549	-0.649756
CON149	1	1	3	-1.8208	-2.66458	2.41298
CON150	1	1	3	-1.4316	-1.99979	2.16105
CON151	1	1	3	-1.21302	-1.7005	2.18145
CON152	1	1	3	-1.33619	-1.89872	2.25757
CON153	2	2	2	0.138204	0.278599	-0.0931954
CON154	3	3	1	0.442577	0.741578	-0.650327
CON155	3	3	1	0.433813	0.73597	-0.712206
CON156	2	2	2	0.0134967	0.0959414	0.200871
CON157	1	1	3	-1.5688	-2.25297	2.38916
CON158	2	2	2	0.0204561	0.13119	0.0173122
CON159	1	1	3	-0.839187	-1.13095	2.12364
CON160	1	1	3	-1.5419	-2.24334	2.28018
CON161	1	1	3	-1.97485	-2.89424	2.58828
CON162	2	2	2	0.0144279	0.0978433	0.136464
CON163	3	3	1	0.428721	0.674899	-0.833767
CON164	2	2	2	0.0063275	0.0754289	0.0961748
CON165	3	3	1	0.534811	0.871732	-0.613074
CON166	2	2	2	0.0155849	0.0883372	-0.043093
CON167	2	2	2	0.0193061	0.0628905	0.0529506
CON168	3	3	1	0.579572	0.933831	-0.66479
CON169	2	2	2	0.0202649	0.10709	0.0300476
CON170	2	2	2	-0.0231966	0.0328676	0.035297
CON171	3	3	1	0.556429	0.898908	-0.756397
CON172	2	2	2	0.0183393	0.0774569	0.0115444
CON173	2	2	2	0.0632988	0.147559	-0.00751693
CON174	2	2	2	0.0051998	0.0583523	-0.0454959
CON175	2	2	2	0.0151924	0.085633	0.0910064
CON176	3	3	1	0.678681	1.15845	-0.873519
CON177	1	1	3	-1.7437	-2.53268	2.53973
CON178	3	3	1	0.598282	0.965794	-0.553166
CON179	2	2	2	0.0510632	0.165266	-0.0223502
CON180	3	3	1	0.544015	0.881628	-0.746615
CON181	2	2	2	0.0086196	0.0615088	0.11298
CON182	2	2	2	0.0805138	0.202782	0.151224
CON183	2	2	2	0.128408	0.26061	0.0075957
CON184	1	1	3	-1.55239	-2.19403	2.52384
CON185	2	2	2	0.110899	0.212397	0.112634
CON186	1	1	3	-1.20852	-1.67006	2.26209
CON187	2	2	2	0.0565848	0.174289	0.128946
CON188	2	2	2	-0.0600246	0.00509574	0.0561116
CON189	2	2	2	0.0382201	0.171498	-0.00352563
CON190	2	2	2	-0.032475	0.019709	0.211952
CON191	3	3	1	0.567261	1.01671	-0.662271
CON192	2	2	2	0.0180167	0.150635	0.234034
CON193	2	2	2	0.114216	0.224279	0.104616
CON194	3	3	1	0.476717	0.791034	-0.677274
CON195	1	1	3	-1.32934	-1.88487	2.4375
CON196	2	2	2	0.0482352	0.144223	-0.0439892
CON197	3	3	1	0.373048	0.647691	-0.612829
CON198	1	1	3	-1.70789	-2.44531	2.41144
CON199	2	2	2	-0.0335481	0.0133469	0.0799127
CON200	2	2	2	-0.021499	0.016695	-0.0189355
CON201	3	3	1	0.389962	0.657665	-0.661318
CON202	2	2	2	0.00661916	0.0769539	0.01847
CON203	2	2	2	0.0368322	0.129602	-0.0112026
CON204	2	2	2	-0.0504016	-0.00889592	-0.0758162
CON205	2	2	2	-0.0200372	0.0100019	0.0759008
CON206	1	1	3	-1.5888	-2.32465	2.29942
CON207	3	3	1	0.53476	0.889899	-0.789781
CON208	2	2	2	0.0150103	0.0625093	0.0330529
CON209	2	2	2	0.0150175	0.0817279	0.0917864
CON210	2	2	2	-0.125653	-0.126833	0.322248
CON211	2	2	2	0.0239824	0.08523	0.0770954
CON212	2	2	2	0.0207986	0.0755428	0.041406
CON213	3	3	1	0.427256	0.744492	-0.613114
CON214	1	1	3	-0.851822	-1.15763	1.73601
CON215	3	3	1	0.515191	0.882369	-0.766564
CON216	2	2	2	-0.0399584	-0.000129355	0.0812339
CON217	2	2	2	-0.617121	-0.873516	1.0741
CON218	2	2	2	0.0064698	0.054214	-0.0125617
CON219	3	3	1	0.528219	0.877904	-0.709685
CON220	2	2	2	0.0653187	0.174384	-0.00941509
CON221	2	2	2	-0.0192693	0.0290697	0.0202444
CON222	3	3	1	0.522484	0.858638	-0.737427
CON223	3	3	1	0.648901	1.06259	-0.754828
CON224	2	2	2	-0.0363144	0.0070107	-0.00790212
CON225	2	2	2	-0.00945783	0.0523359	-0.0284001
CON226	2	2	2	0.0683	0.180154	-0.0104802
CON227	2	2	2	-0.0402064	0.0132841	0.0188303
CON228	2	2	2	0.0631392	0.168404	0.00770841
CON229	2	2	2	0.0671634	0.159825	0.0802555
CON230	2	2	2	-0.0517634	-0.0195284	-0.0870584
CON231	3	3	1	0.526206	0.87513	-0.714119
CON232	2	2	2	0.130811	0.269282	-0.0979779
CON233	1	1	3	-1.32258	-1.89736	2.13371
CON234	3	3	1	0.622459	1.05296	-0.711361
CON235	2	2	2	-0.0308839	0.024205	-0.0425125
CON236	2	2	2	0.106861	0.201903	-0.0286401
CON237	3	3	1	0.529425	0.84258	-0.688064
CON238	2	2	2	-0.0126127	0.0521915	-0.0615059
CON239	2	2	2	0.00356298	0.0545062	-0.0239238
CON240	3	3	1	0.654011	1.0598	-0.686577
CON241	3	3	1	0.721901	1.184	-0.647439
CON242	2	2	2	0.000807569	0.0362167	0.0193383
CON243	3	3	1	0.633117	1.01723	-0.707743
CON244	1	1	3	-2.00237	-2.90522	2.47645
CON245	2	2	2	-0.00581501	0.0441466	0.00284966
CON246	1	1	3	-1.55193	-2.19136	2.57768
CON247	2	2	2	0.0996454	0.223275	0.00718644
CON248	3	3	1	0.658669	1.08275	-0.824875
CON249	2	2	2	0.0083448	0.0672782	0.0206017
CON250	2	2	2	0.0849601	0.197574	0.0682447
CON251	2	2	2	-0.00754844	0.0499212	0.000733179
CON252	2	2	2	0.101868	0.242502	-0.0321088
CON253	2	2	2	0.0916964	0.202399	0.0593585
CON254	2	2	2	-0.0240183	0.0412543	0.0127574
CON255	2	2	2	0.108428	0.253653	0.0258912
CON256	2	2	2	-0.0206034	0.0312742	0.0458693
CON257	3	3	1	0.59901	1.00749	-0.698405
CON258	3	3	1	0.604383	1.00264	-0.707
CON259	2	2	2	0.109718	0.216201	-0.087726
CON260	1	1	3	-1.46687	-2.078	2.55906
CON261	3	3	1	0.61878	1.01946	-0.677735
CON262	2	2	2	0.052474	0.156449	-0.0527577
CON263	2	2	2	0.0858019	0.1962	-0.019883
CON264	3	3	1	0.542026	0.883266	-0.715563
CON265	3	3	1	0.616955	1.05673	-0.673538
CON266	3	3	1	0.378361	0.699332	-0.593784
CON267	2	2	2	-0.0463027	0.0110927	0.0512878
CON268	1	1	3	-1.64813	-2.37869	2.30438
CON269	2	2	2	0.0546267	0.180056	-0.00438119
CON270	1	1	3	-1.43959	-2.03429	2.31556
CON271	3	3	1	0.404287	0.714116	-0.637859
CON272	2	2	2	0.0470333	0.178905	0.00893576
CON273	3	3	1	0.423935	0.761496	-0.53969
CON274	2	2	2	-0.034387	0.0408481	0.0064481
CON275	2	2	2	-0.0564734	-0.0213896	-0.0929661
CON276	3	3	1	0.565531	1.00089	-0.802585
CON277	1	1	3	-1.63022	-2.32947	2.41076
CON278	2	2	2	0.0100682	0.0875713	-0.00385919
CON279	2	2	2	0.0534209	0.150982	-0.0242651
CON280	1	1	3	-1.29625	-1.81304	2.11901
CON281	2	2	2	0.0139328	0.0810344	-0.0235852
CON282	2	2	2	-0.0276884	0.000970368	-0.021701
CON283	2	2	2	-0.0227579	0.0150977	-0.0109277
CON284	2	2	2	-0.0193463	0.0106031	0.0237837
CON285	2	2	2	-0.0124412	0.00890648	0.047495
CON286	2	2	2	-0.0286735	0.0014944	0.0972817
CON287	2	2	2	-0.0177269	0.0309732	0.0583158
CON288	3	3	1	0.524317	0.867231	-0.650847
CON289	1	1	3	-1.02867	-1.44517	1.99904
CON290	2	2	2	0.0071097	0.0704859	0.14629
CON291	2	2	2	-0.00110576	0.0330154	0.0210023
CON292	3	3	1	0.74441	1.21947	-0.781567
CON293	3	3	1	0.694783	1.13061	-0.696515
CON294	2	2	2	0.0159029	0.0840654	-0.0121803
CON295	2	2	2	0.0766914	0.133794	-0.0203147
CON296	3	3	1	0.552966	0.943978	-0.734843
CON297	3	3	1	0.470325	0.804755	-0.661967
CON298	2	2	2	-0.0293601	-0.00846167	-0.157816
CON299	2	2	2	-0.00431308	0.0469806	0.0868394
CON300	3	3	1	0.555865	0.893145	-0.615339
CON301	3	3	1	0.665248	1.09508	-0.645661
CON302	3	3	1	0.535509	0.876289	-0.634217
CON303	3	3	1	0.565377	0.917656	-0.700485
CON304	3	3	1	0.650229	1.05916	-0.650997
CON305	3	3	1	0.482419	0.797599	-0.540769
CON306	3	3	1	0.514495	0.843511	-0.677596
CON307	3	3	1	0.6563	1.06849	-0.765845
CON308	3	3	1	0.681542	1.11212	-0.768496
CON309	3	3	1	0.575459	0.946371	-0.717077
CON310	2	2	2	-0.00993381	0.0527447	0.0461126
CON311	2	2	2	-0.0392901	-0.000185066	0.0915064
CON312	1	1	3	-1.93818	-2.84154	2.72789
CON313	3	3	1	0.641726	1.04376	-0.744138
CON314	2	2	2	-0.000146553	0.0465858	0.169121
CON315	3	2	1	0.337534	0.534425	-0.510711
CON316	1	1	3	-0.846825	-1.19237	1.96501
CON317	2	2	2	-0.0395529	-0.00346156	0.00906604
CON318	3	3	1	0.573682	0.939373	-0.738196
CON319	2	2	2	-0.0698805	-0.0177496	0.0738239
CON320	3	3	1	0.642146	1.04768	-0.698225
CON321	2	2	2	0.0413805	0.144613	0.0573501
CON322	3	3	1	0.582803	0.985728	-0.660648
CON323	2	2	2	-0.0242382	0.00680609	0.0828753
CON324	2	2	2	-0.00491951	0.0563264	0.048335
CON325	2	2	2	0.0144282	0.0879572	0.025008
CON326	2	2	2	-0.0157992	0.0645403	-0.00722584
CON327	3	3	1	0.561902	0.895005	-0.734147
CON328	1	1	3	-1.54983	-2.21014	2.41314
CON329	3	3	1	0.316891	0.542665	-0.519098
CON330	3	3	1	0.452379	0.798786	-0.706956
CON331	3	3	1	0.492474	0.818516	-0.722848
CON332	2	2	2	0.0165309	0.0758365	0.0543479
CON333	2	2	2	-0.046553	-0.0146148	0.0671758
CON334	2	2	2	-2.7599e-05	0.0707347	-0.0904609
CON335	2	2	2	0.01895	0.101577	0.148291
CON336	3	3	1	0.553312	0.896007	-0.577155
CON337	2	2	2	0.018341	0.0888583	0.0540254
CON338	2	2	2	-0.0176371	0.0219026	0.133075
CON339	2	2	2	0.0340324	0.117503	0.148887
CON340	3	3	1	0.510847	0.870583	-0.673715
CON341	3	3	1	0.453578	0.741201	-0.546098
CON342	1	1	3	-1.35359	-1.95592	2.3462
CON343	2	2	2	0.00455091	0.0713344	0.0170884
CON344	3	3	1	0.4909	0.810665	-0.630997
CON345	2	2	2	-0.0363751	0.0357357	0.104379
CON346	2	2	2	-0.00790542	0.0756633	0.0313575
CON347	3	3	1	0.353777	0.676091	-0.478925
CON348	2	2	2	-0.0206477	0.0789017	0.0614592
CON349	3	3	1	0.421605	0.772586	-0.693901
CON350	3	3	1	0.376656	0.679488	-0.624069
CON351	3	3	1	0.482786	0.871066	-0.623355
CON352	2	2	2	-0.0657457	0.0133134	0.052999
CON353	3	3	1	0.589608	0.985357	-0.664408
CON354	1	1	3	-1.67401	-2.39829	2.30018
CON355	1	1	3	-1.3786	-1.91812	2.2663
CON356	2	2	2	0.0388933	0.115879	-0.0250585
CON357	2	2	2	0.131127	0.240923	-0.0814702
CON358	2	2	2	-0.0968991	-0.0411508	-0.0138643
CON359	2	2	1	0.295839	0.539974	-0.553052
CON360	2	2	2	0.034028	0.153051	0.0904058
CON361	3	3	1	0.514627	0.843597	-0.670952
CON362	2	2	2	0.0412562	0.126571	0.116724
CON363	2	2	2	-0.0207353	0.0110213	0.040772
CON364	3	3	1	0.512464	0.849838	-0.581674
CON365	2	2	2	-0.0239621	0.038878	0.00166778
CON366	3	3	1	0.684405	1.133	-0.705931
CON367	2	2	2	0.0109806	0.0865947	0.102094
CON368	3	3	1	0.636106	1.062	-0.740769
CON369	3	3	1	0.611633	0.992634	-0.615632
CON370	2	2	2	-0.0153708	0.030428	0.0615452
CON371	2	2	2	0.015488	0.0884506	0.0390275
CON372	2	2	2	0.00983547	0.0911734	0.0378561
CON373	2	2	2	0.0448021	0.130066	0.047269
CON374	3	3	1	0.589794	0.974998	-0.682063
CON375	2	2	2	-0.043709	-0.0153412	0.0157122
CON376	3	3	1	0.607136	1.00478	-0.661561
CON377	2	2	2	-0.0219405	0.0166875	0.131917
CON378	1	1	3	-1.07233	-1.49132	2.03386
CON379	3	3	1	0.635425	1.03376	-0.71384
CON380	2	2	2	-0.0547531	-0.00223629	-0.0387541
CON381	3	3	1	0.562155	0.933052	-0.648769
CON382	3	3	1	0.631839	1.03411	-0.581197
CON383	2	2	2	-0.0115331	0.0403683	-0.0243264
CON384	2	2	2	-0.00851316	0.0406115	0.0290876
CON385	2	2	2	0.0587069	0.188274	0.0076036
CON386	2	2	2	0.0017897	0.0987427	-0.0123409
CON387	3	3	1	0.447496	0.799826	-0.464293
CON388	1	1	3	-1.34635	-1.88261	2.52374
CON389	1	1	3	-1.39393	-1.96204	2.35954
CON390	3	3	1	0.546745	0.905891	-0.678124
CON391	2	2	2	-0.0567581	-0.00792242	0.0862875
CON392	2	2	2	-0.0459806	0.00768895	0.0423447
CON393	2	2	2	0.0152565	0.0806712	-0.00245682
CON394	2	2	2	0.0424764	0.114844	0.0669146
CON395	2	2	2	-0.00101821	0.0198343	0.0175752
CON396	2	2	2	0.0601909	0.161386	0.0534972
CON397	3	3	1	0.639976	1.00911	-0.522347
CON398	2	2	2	-0.0516118	-0.0142234	-0.0221685
CON399	3	3	1	0.504204	0.841707	-0.467757
CON400	3	3	1	0.637486	1.05582	-0.712335
CON401	2	2	2	-0.0191501	0.0745798	0.0627898
CON402	2	2	2	-0.000946284	0.0935299	-0.0101793
CON403	3	3	1	0.472293	0.803726	-0.536392
CON404	2	2	2	0.00342639	0.0853748	0.00415561
CON405	3	3	1	0.373274	0.658198	-0.425599
CON406	2	2	2	-0.0306584	0.0194529	0.0445687
CON407	3	3	1	0.602506	1.00267	-0.671665
CON408	3	3	1	0.614258	1.02605	-0.68201
CON409	2	2	2	-0.0384658	-0.00625642	0.0131556
CON410	3	3	1	0.64203	1.06365	-0.693308
CON411	2	2	2	-0.0361018	0.00493835	0.0692761
CON412	3	3	1	0.590204	0.983778	-0.698704
CON413	3	3	1	0.643435	1.06967	-0.666443
CON414	2	2	2	0.115829	0.230133	-0.000363592
CON415	1	1	3	-1.87286	-2.72232	2.4721
CON416	2	2	2	-0.00628079	0.0320589	-0.0381121
CON417	3	3	1	0.667912	1.09973	-0.630222
CON418	1	1	3	-1.3686	-1.9874	2.19459
CON419	2	2	2	0.00468628	0.0607789	0.0169512
CON420	2	2	2	-0.0455627	0.000144413	0.0372661
CON421	3	3	1	0.711453	1.18029	-0.692148
CON422	3	3	1	0.608728	1.01173	-0.736187
CON423	3	3	1	0.641082	1.06021	-0.756614
CON424	3	3	1	0.630619	1.05351	-0.699141
CON425	2	2	2	-0.0347814	0.0193062	0.0394284
CON426	3	3	1	0.656769	1.05619	-0.625979
CON427	2	2	2	-0.023608	0.0382047	0.0188793
CON428	3	3	1	0.541848	0.887879	-0.670476
CON429	2	2	2	0.0602954	0.122543	-0.126577
CON430	3	3	1	0.605195	0.999777	-0.732646
CON431	3	3	1	0.49968	0.825775	-0.663297
CON432	2	2	2	-0.00572239	0.0365332	0.000131064
CON433	2	2	2	0.0157192	0.0774327	0.0345916
CON434	2	2	2	-0.0116208	0.0322597	-0.00349342
CON435	1	1	3	-1.86909	-2.70521	2.59573
CON436	2	2	2	-0.0158502	0.0387662	0.0174049
CON437	2	2	2	-0.0238655	0.0119024	-0.0475099
CON438	2	2	2	0.0705901	0.196288	0.00846675
CON439	2	2	2	-0.0224938	0.013924	-0.0276305
CON440	1	1	3	-2.28745	-3.38533	2.8125
CON441	1	1	3	-1.49974	-2.12914	2.36704
CON442	3	3	1	0.638412	1.05321	-0.721828
CON443	2	2	2	-0.00357603	0.0423942	-0.021872
CON444	2	2	2	0.000437497	0.059561	-0.0605825
CON445	2	2	2	0.0616645	0.146902	0.0344351
CON446	2	2	2	0.0113309	0.0779459	0.0789415
CON447	2	2	2	0.117717	0.247811	0.0551009
CON448	2	2	2	0.0792551	0.189249	0.0229841
CON449	2	2	2	-0.0108906	0.053631	-0.0433314
CON450	1	1	3	-1.69802	-2.45265	2.46105
CON451	3	3	1	0.697995	1.16726	-0.7048
CON452	3	3	1	0.450978	0.724911	-0.636283
CON453	2	2	2	-0.0203365	0.0217665	-0.0415122
CON454	1	1	3	-1.37498	-1.94825	2.30704
CON455	2	2	2	0.0880768	0.200465	0.0429209
CON456	3	3	1	0.641203	1.04399	-0.718429
CON457	1	1	3	-1.17542	-1.65076	2.22401
CON458	3	3	1	0.604942	0.994854	-0.719135
CON459	2	2	2	0.114623	0.257306	0.0138867
CON460	3	3	1	0.630467	1.05344	-0.602098
CON461	2	2	2	-0.00389819	0.0719959	-0.0118221
CON462	2	2	2	-0.00947074	0.0628703	-0.0208423
CON463	2	2	2	-0.0184665	0.0387591	0.0972677
CON464	2	2	2	0.0161095	0.0892806	-0.0205132
CON465	2	2	2	-0.011413	0.0450413	0.0119677
CON466	2	2	2	-0.0239891	0.0125551	0.0502561
CON467	1	1	3	-1.28915	-1.78403	2.43231

## Sheet: chr9_71952096_71953157
IDV	CNV genotype			Signal Intensity (log2 ratio)
	Raw	PCA	LDF	Raw	PCA	LDF
CASE1	2	2	1	-0.021712	0.225019	0.103397
CASE2	2	2	1	-0.00888566	0.283211	0.051455
CASE3	2	2	1	0.0123892	0.448698	-0.180978
CASE4	2	2	1	-0.079305	-0.128607	0.392842
CASE5	2	2	1	-0.0271876	0.165454	0.06247
CASE6	2	2	1	-0.0264029	0.186486	0.117133
CASE7	2	2	1	-0.0545648	-0.0049391	0.32054
CASE8	2	2	1	-0.0227337	0.242166	-0.0441824
CASE9	2	2	1	-0.0532951	0.0275944	0.353477
CASE10	2	2	1	0.00642083	0.399643	-0.0791725
CASE11	2	2	1	-0.0388814	0.106767	0.171493
CASE12	2	2	1	-0.088568	-0.204207	0.377699
CASE13	2	2	1	-0.0505633	0.0501568	0.171841
CASE14	2	2	1	-0.0662498	-0.0587646	0.412782
CASE15	2	2	1	-0.0379771	0.112558	0.22488
CASE16	2	2	1	0.0244231	0.566097	-0.00283013
CASE17	2	2	1	-0.0228878	0.202387	0.101928
CASE18	2	2	1	0.0153915	0.418474	-0.0177098
CASE19	2	2	1	0.00174631	0.336217	0.0151816
CASE20	2	2	1	-0.0640726	-0.0459657	0.347556
CASE21	2	2	1	-0.0163639	0.294308	-0.0890822
CASE22	2	2	1	0.0213066	0.474057	0.224017
CASE23	2	2	1	-0.013232	0.252956	-0.119649
CASE24	2	2	1	-0.0122523	0.228856	0.296293
CASE25	2	2	1	0.0139098	0.438212	0.0231465
CASE26	2	2	1	-0.00554016	0.316435	0.0501749
CASE27	2	2	1	-0.00424152	0.289598	0.158352
CASE28	2	2	1	-0.00722128	0.312686	-0.176704
CASE29	2	2	1	-0.0179061	0.237276	0.0734195
CASE30	2	2	1	-0.0221079	0.195789	-0.0778177
CASE31	2	2	1	-0.0419495	0.102923	0.0704553
CASE32	2	2	1	-0.0702065	-0.0871206	0.327615
CASE33	2	2	1	-0.0667932	-0.0470394	0.0636837
CASE34	2	2	1	-0.041981	0.0767484	0.215826
CASE35	2	2	1	-0.0537203	0.0416743	0.304681
CASE36	2	2	1	0.0336477	0.599194	-0.158888
CASE37	2	2	1	-0.0353338	0.0749662	0.279574
CASE38	2	2	1	0.0256676	0.467545	-0.179323
CASE39	2	2	1	-0.0895979	-0.254157	0.701915
CASE40	2	2	1	-0.0248387	0.157137	0.240163
CASE41	2	2	1	-0.0909708	-0.0790897	0.229053
CASE42	2	2	1	0.00713879	0.416429	-0.10774
CASE43	2	2	1	-0.046623	0.0375056	0.190005
CASE44	2	2	1	-0.024061	0.147319	0.276912
CASE45	2	2	1	-0.0222756	0.195977	0.239362
CASE46	2	2	1	-0.0214344	0.160976	0.067111
CASE47	2	2	1	-0.116149	-0.361812	0.355467
CASE48	2	2	1	-0.103339	-0.337844	0.581931
CASE49	2	2	1	-0.0977199	-0.255496	0.418618
CASE50	2	2	1	-0.0939114	-0.297519	0.566934
CASE51	2	2	1	-0.0246236	0.198228	0.181079
CASE52	2	2	1	-0.0849899	-0.212755	0.44911
CASE53	2	2	1	0.0276048	0.529035	-0.17594
CASE54	1	1	2	-0.618586	-3.82173	4.51
CASE55	2	2	1	-0.0101221	0.273217	0.0702713
CASE56	2	2	1	-0.0616682	-0.0586897	0.303511
CASE57	2	2	1	-0.0655335	-0.0990965	0.268009
CASE58	2	2	1	-0.0296409	0.159819	0.0827937
CASE59	2	2	1	-0.00621399	0.273997	0.19532
CASE60	2	2	1	-0.00995277	0.2759	0.2247
CASE61	2	2	1	-0.0465054	0.0556789	0.0873119
CASE62	2	2	1	-0.0790161	-0.201243	0.431976
CASE63	2	2	1	-0.00802455	0.256488	0.118223
CASE64	2	2	1	-0.0841931	-0.237946	0.439085
CASE65	2	2	1	-0.0669505	-0.134875	0.210146
CASE66	2	2	1	-0.00495461	0.300137	-0.209273
CASE67	2	2	1	-0.0999245	-0.309439	0.705763
CASE68	2	2	1	-0.109918	-0.385063	0.531384
CASE69	2	2	1	-0.0386506	0.0562295	0.163974
CASE70	2	2	1	-0.0797066	-0.220623	0.189238
CASE71	2	2	1	-0.0444208	0.0455681	0.307748
CASE72	2	2	1	-0.00936128	0.216591	0.0921561
CASE73	2	2	1	-0.0269618	0.181594	0.0891206
CASE74	2	2	1	0.0109002	0.414007	-0.132977
CASE75	2	2	1	-0.0257356	0.158178	0.299028
CASE76	2	2	1	-0.0485758	0.0527906	-0.0404711
CASE77	2	2	1	-0.0223239	0.214662	-0.182004
CASE78	2	2	1	-0.00494456	0.285269	-0.144372
CASE79	2	2	1	-0.0457032	0.0425263	0.276444
CASE80	2	2	1	-0.0300225	0.121819	0.244104
CASE81	2	2	1	-0.0656005	-0.101377	0.603748
CASE82	2	2	1	-0.0487108	-0.005115	0.391022
CASE83	2	2	1	-0.00601639	0.32388	0.157677
CASE84	2	2	1	-0.0321284	0.154488	0.0868998
CASE85	2	2	1	-0.0191512	0.134207	0.407679
CASE86	1	1	2	-0.611181	-3.83054	4.61642
CASE87	2	2	1	-0.0907621	-0.248013	0.403274
CASE88	2	2	1	-0.0276146	0.167627	0.227735
CASE89	2	2	1	-0.0649284	-0.134369	0.384552
CASE90	2	2	1	-0.0799725	-0.169311	0.573996
CASE91	2	2	1	-0.0473274	0.0248008	0.0900979
CASE92	2	2	1	-0.0247668	0.18461	0.293862
CASE93	1	1	2	-0.830919	-5.18966	5.28391
CASE94	2	2	1	-0.0693974	-0.144502	0.35794
CASE95	2	2	1	-0.0527184	-0.0920648	0.399454
CASE96	2	2	1	-0.0862012	-0.234336	0.518421
CASE97	2	2	1	-0.040194	0.0734255	0.210999
CASE98	2	2	1	-0.050881	0.00141278	0.330634
CASE99	2	2	1	-0.0342162	0.111704	0.198934
CASE100	2	2	1	-0.138058	-0.622075	0.861671
CASE101	2	2	1	-0.03434	0.125435	0.169274
CASE102	2	2	1	-0.0305714	0.201502	0.122215
CASE103	2	2	1	-0.00099715	0.342886	-0.133913
CASE104	2	2	1	0.0111349	0.439582	-0.164192
CASE105	2	2	1	0.0259133	0.509906	-0.114039
CASE106	2	2	1	-0.0225897	0.195106	0.0775625
CASE107	2	2	1	0.0235619	0.525563	-0.176635
CASE108	2	2	1	-0.026349	0.18472	0.0384943
CASE109	2	2	1	-0.0435905	0.123583	0.00581238
CASE110	2	2	1	0.026426	0.538951	-0.228727
CASE111	2	2	1	-0.0402668	0.0858417	0.0141833
CASE112	2	2	1	-0.00234036	0.377566	-0.262578
CASE113	2	2	1	-0.00917128	0.310048	0.0484014
CASE114	2	2	1	-0.0391858	0.079451	0.129466
CASE115	2	2	1	-0.040951	0.0521459	0.346583
CASE116	2	2	1	-0.0257164	0.124193	0.159615
CASE117	2	2	1	-0.0392874	0.126395	-0.0144274
CASE118	1	1	2	-0.842375	-5.2979	5.53316
CASE119	2	2	1	0.0409283	0.604844	-0.367305
CASE120	2	2	1	-0.0995082	-0.305915	0.491687
CASE121	2	2	1	-0.0528775	-0.0211521	0.351348
CASE122	2	2	1	0.00291142	0.371771	-0.0427786
CASE123	2	2	1	-0.0245646	0.162463	0.112987
CASE124	2	2	1	-0.0650936	-0.099479	0.299653
CASE125	2	2	1	-0.00449037	0.298362	0.0624046
CASE126	2	2	1	0.0205529	0.47868	-0.188109
CASE127	2	2	1	0.0329576	0.567619	-0.106451
CASE128	2	2	1	0.0561136	0.700921	-0.162034
CASE129	2	2	1	-0.0535626	0.0150061	0.234923
CASE130	2	2	1	-0.00729104	0.30234	0.12844
CASE131	2	2	1	0.0467416	0.643382	-0.0860842
CASE132	2	2	1	-0.00324626	0.328973	0.0793509
CASE133	2	2	1	0.0209481	0.502403	-0.0126929
CASE134	2	2	1	-0.00228115	0.309162	0.0742559
CASE135	2	2	1	0.0580612	0.788567	-0.433442
CASE136	2	2	1	-0.0107407	0.243516	0.283841
CASE137	2	2	1	0.0252863	0.498617	-0.038851
CASE138	2	2	1	-0.000781634	0.330886	0.0939805
CASE139	2	2	1	0.0197882	0.509843	-0.120253
CASE140	2	2	1	-0.0336127	0.121076	0.232609
CASE141	2	2	1	-0.0165687	0.242177	0.0713257
CASE142	2	2	1	-0.0138148	0.263205	0.0618418
CASE143	2	2	1	-0.00708679	0.300162	-0.0205144
CASE144	2	2	1	0.0209813	0.43405	-0.0929167
CASE145	2	2	1	0.0299011	0.55124	-0.210752
CASE146	2	2	1	0.0126451	0.395803	0.0145292
CASE147	2	2	1	-0.0540219	-0.0277181	0.268487
CASE148	2	2	1	-0.00152552	0.322315	0.0739576
CASE149	2	2	1	0.0151558	0.43051	-0.0828691
CASE150	2	2	1	0.00959615	0.375429	-0.0893196
CASE151	1	1	2	-0.681445	-4.24393	4.63115
CASE152	2	2	1	0.0318185	0.548275	-0.119561
CASE153	1	1	2	-0.810393	-5.04301	5.33776
CASE154	2	2	1	0.0159393	0.455391	0.0447336
CASE155	2	2	1	0.0208512	0.46449	-0.0328583
CASE156	2	2	1	-0.0445127	0.03917	0.343965
CASE157	2	2	1	-0.0214953	0.17996	0.115031
CASE158	2	2	1	-0.00879556	0.29536	-0.0336871
CASE159	2	2	1	-0.000556806	0.304625	0.00246694
CASE160	2	2	1	0.0335732	0.595774	-0.272815
CASE161	2	2	1	0.00241249	0.335007	0.0277787
CASE162	2	2	1	-0.0200457	0.215564	0.104771
CASE163	2	2	1	-0.0176192	0.19896	0.0835624
CASE164	2	2	1	-0.0268808	0.175042	0.13014
CASE165	2	2	1	-0.0197367	0.231339	0.147741
CASE166	2	2	1	-0.012636	0.303708	-0.0620235
CASE167	2	2	1	-0.0448364	0.0673856	0.211615
CASE168	2	2	1	-0.0308224	0.158541	0.166002
CASE169	2	2	1	-0.0261887	0.198166	-0.097316
CASE170	2	2	1	-0.0290725	0.196173	0.162854
CASE171	2	2	1	-0.0751933	-0.14348	0.237391
CASE172	2	2	1	-0.0406578	0.0634183	0.245405
CASE173	2	2	1	-0.0469811	0.0579615	0.128981
CASE174	2	2	1	-0.0560634	-0.00101526	0.174882
CASE175	2	2	1	-0.0554817	-0.066883	0.367404
CASE176	2	2	1	-0.0638961	-0.0923379	0.353225
CASE177	2	2	1	-0.0130651	0.25279	0.0511171
CASE178	2	2	1	-0.0285807	0.15015	0.146211
CASE179	2	2	1	-0.0933677	-0.274825	0.518276
CASE180	2	2	1	-0.0665751	-0.11153	0.429306
CASE181	2	2	1	-0.0220162	0.154683	0.358619
CASE182	2	2	1	-0.0611071	-0.0934566	0.316386
CASE183	2	2	1	0.0108015	0.421168	-0.0573105
CASE184	2	2	1	-0.00920376	0.263957	0.0136428
CASE185	2	2	1	0.0204624	0.501348	-0.11007
CASE186	2	2	1	0.021103	0.481441	-0.396477
CASE187	2	2	1	0.0155279	0.400214	-0.0559047
CASE188	2	2	1	0.0381671	0.557002	-0.275192
CASE189	2	2	1	-0.0487161	-0.00128995	0.44784
CASE190	2	2	1	0.0575058	0.642771	-0.028447
CASE191	2	2	1	-0.0175427	0.202579	0.199586
CASE192	2	2	1	0.014761	0.403936	-0.0871753
CASE193	2	2	1	-0.0262129	0.116262	0.129879
CASE194	2	2	1	-0.0355263	0.0948101	0.234749
CASE195	2	2	1	-0.0056378	0.297181	0.0739758
CASE196	2	2	1	-0.0685397	-0.147791	0.417061
CASE197	2	2	1	-0.0230851	0.234003	0.0950368
CASE198	2	2	1	-0.0540524	0.000944485	0.306098
CASE199	2	2	1	-0.0378595	0.0611003	0.323161
CASE200	2	2	1	-0.0239736	0.22998	0.0902638
CASE201	2	2	1	-0.0151115	0.236086	-0.00289267
CASE202	2	2	1	-0.0773197	-0.131633	0.325538
CASE203	2	2	1	-0.122407	-0.440437	0.424551
CASE204	2	2	1	-0.0355377	0.122048	0.0130212
CASE205	2	2	1	-0.11343	-0.452761	0.700564
CASE206	2	2	1	-0.00102796	0.361472	-0.0806437
CASE207	2	2	1	-0.0291825	0.182073	0.201286
CASE208	2	2	1	0.0420072	0.664656	-0.203736
CASE209	2	2	1	0.00455793	0.384392	-0.100697
CASE210	2	2	1	0.0165223	0.493982	-0.110668
CASE211	2	2	1	-0.119471	-0.425038	0.536734
CASE212	2	2	1	-0.145999	-0.656458	1.27145
CASE213	2	2	1	-0.0133171	0.255054	0.0799824
CASE214	2	2	1	0.0572616	0.798189	-0.236543
CASE215	2	2	1	-0.038837	0.100645	0.150705
CASE216	2	2	1	0.0169902	0.505153	-0.274144
CASE217	2	2	1	-0.0150555	0.255317	0.11153
CASE218	1	1	2	-0.560227	-3.442	4.00796
CASE219	2	2	1	-0.0187651	0.221274	0.0939474
CASE220	2	2	1	-0.039109	0.0957576	0.281739
CASE221	2	2	1	-0.00326891	0.358888	0.210048
CASE222	1	1	2	-0.797991	-4.97946	5.46001
CASE223	2	2	1	-0.0333039	0.150118	0.438243
CASE224	2	2	1	-0.0373497	0.0927741	0.360404
CASE225	2	2	1	0.00554931	0.386556	-0.022893
CASE226	2	2	1	-0.0283814	0.169368	0.116759
CASE227	2	2	1	-0.054277	-0.0100852	0.240631
CASE228	2	2	1	-0.00250211	0.326599	-0.00201694
CASE229	2	2	1	-0.0533763	-0.0189202	0.107118
CASE230	2	2	1	0.043011	0.650956	-0.112512
CASE231	1	1	2	-0.779241	-4.89439	5.37152
CASE232	2	2	1	0.017196	0.478328	0.0471348
CASE233	2	2	1	-0.0470337	0.00193955	0.43483
CASE234	2	2	1	0.00843647	0.441837	-0.0590944
CASE235	2	2	1	0.041639	0.629443	-0.0467457
CASE236	2	2	1	0.0105989	0.426034	0.0745659
CASE237	1	1	2	-0.811171	-5.0482	5.35943
CASE238	2	2	1	-0.0167568	0.289126	0.0512329
CASE239	2	2	1	0.0243112	0.521225	-0.098925
CASE240	2	2	1	0.0334834	0.599717	-0.191501
CASE241	2	2	1	0.0039983	0.385837	-0.165018
CASE242	2	2	1	-0.0298075	0.204846	0.0273225
CASE243	2	2	1	-0.0238481	0.197526	0.0846063
CASE244	2	2	1	-0.221601	-1.20638	0.628757
CASE245	2	2	1	-0.056317	-0.0285144	0.123611
CASE246	2	2	1	0.00649644	0.361882	0.118739
CASE247	2	2	1	-0.0331614	0.122139	0.175014
CASE248	2	2	1	0.0171149	0.480686	-0.124914
CASE249	2	2	1	0.00232689	0.370283	-0.00639148
CASE250	2	2	1	0.0518388	0.723127	-0.164454
CASE251	2	2	1	0.0633139	0.75894	-0.240594
CASE252	2	2	1	0.0417321	0.64821	-0.230139
CASE253	2	2	1	0.026342	0.524815	-0.0376488
CASE254	2	2	1	-0.0180728	0.220685	-0.0287297
CASE255	2	2	1	-0.0687414	0.0033721	0.277711
CASE256	2	2	1	-0.0362797	0.0646335	0.135561
CASE257	2	2	1	-0.0390678	0.0395295	0.181716
CASE258	2	2	1	-0.0413163	0.0831832	0.253978
CASE259	2	2	1	-0.0171795	0.251307	0.0287303
CASE260	2	2	1	0.0159155	0.467838	-0.191124
CASE261	2	2	1	-0.0143609	0.254885	0.00113743
CASE262	2	2	1	-0.00404163	0.376627	-0.148227
CASE263	2	2	1	-0.0192986	0.271455	-0.0465359
CASE264	2	2	1	0.0236856	0.548187	-0.194205
CASE265	2	2	1	-0.0482745	0.0467679	0.158493
CASE266	2	2	1	-0.0916024	-0.268107	0.575875
CASE267	2	2	1	-0.0410033	0.104017	0.258745
CASE268	2	2	1	-0.0879123	-0.218535	0.171976
CASE269	2	2	1	-0.0883452	-0.208727	0.325623
CASE270	2	2	1	-0.0400423	0.0714905	0.345151
CASE271	2	2	1	-0.0062338	0.311205	0.0557833
CASE272	2	2	1	-0.0375572	0.0858247	0.223422
CASE273	2	2	1	0.0594028	0.757782	-0.49385
CASE274	2	2	1	0.00767956	0.393262	0.017193
CASE275	2	2	1	0.00964778	0.4021	-0.0864528
CASE276	2	2	1	-0.0534752	-0.0420955	0.258498
CASE277	2	2	1	-0.0438725	0.038428	0.187483
CASE278	1	1	2	-0.729113	-4.44975	4.83601
CASE279	2	2	1	-0.0911094	-0.355404	0.506881
CASE280	2	2	1	-0.0144731	0.167775	0.252177
CASE281	2	2	1	-0.0688138	-0.0939516	0.222392
CASE282	2	2	1	0.00951396	0.487631	-0.673222
CASE283	2	2	1	0.0267508	0.554654	-0.0187257
CASE284	2	2	1	-0.0242386	0.161048	0.0832259
CASE285	2	2	1	-0.0310971	0.234929	-0.11816
CASE286	1	1	2	-0.750579	-4.67889	5.13759
CASE287	2	2	1	-0.0100806	0.225073	0.0790735
CASE288	2	2	1	-0.0303327	0.138509	0.0327186
CASE289	2	2	1	-0.0137246	0.303114	-0.130913
CASE290	2	2	1	-0.0722189	-0.108339	0.285172
CASE291	2	2	1	-0.0255747	0.250271	0.0263564
CASE292	2	2	1	0.0184785	0.485361	-0.00684719
CASE293	2	2	1	0.0739919	0.874266	-0.363488
CASE294	2	2	1	0.0412633	0.629236	-0.268951
CASE295	2	2	1	-0.0258839	0.164262	0.138723
CASE296	2	2	1	-0.0755606	-0.130215	0.334552
CASE297	2	2	1	-0.0676507	-0.0821006	0.208196
CASE298	2	2	1	-0.0207539	0.230274	-0.126308
CASE299	2	2	1	-0.0121395	0.295771	-0.036264
CASE300	2	2	1	-0.0777588	-0.134418	0.485373
CASE301	2	2	1	-0.0581878	-0.012929	0.339655
CASE302	2	2	1	-0.0382231	0.136289	0.140274
CASE303	2	2	1	-0.0286329	0.178832	0.017528
CASE304	2	2	1	-0.103221	-0.312001	0.655046
CASE305	2	2	1	-0.0419453	0.0917604	0.089331
CASE306	2	2	1	-0.0494556	0.0360079	0.16067
CASE307	2	2	1	-0.0112285	0.28046	-0.0272784
CASE308	2	2	1	-0.00262798	0.348084	-0.078163
CASE309	2	2	1	-0.0191023	0.193134	0.0838146
CASE310	2	2	1	-0.0136792	0.296867	0.05456
CASE311	2	2	1	-0.0570736	0.002936	0.386136
CASE312	2	2	1	-0.0802381	-0.162662	0.291437
CASE313	2	2	1	-0.0337826	0.152695	0.0465713
CASE314	2	2	1	-0.0336931	0.158093	0.070526
CASE315	2	2	1	-0.0653307	-0.0726478	0.266711
CASE316	2	2	1	-0.0631187	-0.00694644	0.142242
CASE317	2	2	1	-0.053348	0.0069035	-0.0202495
CASE318	2	2	1	-0.0921731	-0.239904	0.350273
CASE319	2	2	1	-0.0905097	-0.194148	0.523581
CASE320	2	2	1	0.0260378	0.480251	-0.222493
CASE321	2	2	1	-0.0111804	0.226126	-0.078099
CASE322	1	1	2	-0.764122	-4.70526	4.92355
CASE323	2	2	1	-0.0540907	0.0199302	0.203536
CASE324	2	2	1	-0.013115	0.295219	-0.0244346
CASE325	2	2	1	-0.0406725	0.105114	0.172671
CASE326	2	2	1	-0.0549665	-0.0339713	0.178476
CASE327	2	2	1	0.00688791	0.40394	-0.0683312
CASE328	2	2	1	0.0288184	0.558058	-0.23731
CASE329	2	2	1	-0.0223958	0.205264	-0.0493238
CASE330	2	2	1	-0.0196171	0.232171	0.0216659
CASE331	2	2	1	-0.00706458	0.315178	-0.0454157
CASE332	2	2	1	-0.020211	0.211244	0.137426
CASE333	1	1	2	-0.809792	-5.0464	5.36406
CASE334	2	2	1	0.0274349	0.565131	-0.28601
CASE335	2	2	1	0.0680129	0.863125	-0.408355
CASE336	2	2	1	-0.0311013	0.15948	-0.0614589
CASE337	2	2	1	-0.0103649	0.293458	0.0678184
CASE338	2	2	1	-0.0391511	0.102194	0.168765
CASE339	1	1	2	-0.843209	-5.27028	5.67176
CASE340	2	2	1	0.0237848	0.516987	0.0584433
CASE341	2	2	1	-0.0404898	0.11208	0.314045
CASE342	2	2	1	-0.0401455	0.0992944	-0.0463157
CASE343	2	2	1	-0.00270712	0.346423	-0.0144474
CASE344	2	2	1	0.0217476	0.5053	-0.123453
CASE345	2	2	1	0.00964209	0.445418	-0.304984
CASE346	2	2	1	0.00411008	0.381543	-0.00950786
CASE347	2	2	1	-0.00184975	0.403064	0.0161947
CASE348	2	2	1	-0.060073	-0.0309614	0.24284
CASE349	2	2	1	-0.0180495	0.248232	0.0217312
CASE350	2	2	1	0.00108036	0.348221	-0.0273325
CASE351	1	1	2	-0.715337	-4.40477	4.7073
CASE352	1	1	2	-0.776773	-4.81365	5.22019
CASE353	1	1	2	-0.761594	-4.75352	5.04195
CASE354	2	2	1	-0.0437117	0.0669157	0.204181
CASE355	2	2	1	-0.0177744	0.245696	-0.0082501
CASE356	1	1	2	-0.739682	-4.60777	4.68702
CASE357	2	2	1	-0.032429	0.129907	0.131901
CASE358	1	1	2	-0.765453	-4.77728	5.02409
CASE359	2	2	1	-0.0500605	-0.0104656	0.426337
CASE360	2	2	1	-0.00417108	0.340273	0.0196086
CASE361	2	2	1	-0.0350975	0.117785	0.183001
CASE362	2	2	1	-0.00434019	0.330574	-0.0226008
CASE363	2	2	1	-0.0243726	0.196626	-0.0202367
CASE364	2	2	1	-0.00716744	0.322183	-0.0814855
CASE365	2	2	1	0.00145494	0.349185	-0.0511983
CASE366	2	2	1	-0.0265371	0.197935	0.0919992
CASE367	2	2	1	-0.0286982	0.159718	0.176137
CASE368	2	2	1	-0.0304112	0.198027	0.0355333
CASE369	2	2	1	0.0295295	0.586423	-0.31366
CASE370	2	2	1	0.00238722	0.397706	-0.295667
CASE371	2	2	1	-0.0187937	0.250281	-0.0200403
CON1	2	2	1	-0.0431612	0.0888022	0.182876
CON2	2	2	1	-0.0429567	0.061293	0.238832
CON3	2	2	1	-0.0344436	0.122043	0.212364
CON4	2	2	1	-0.0535197	-0.0591052	0.442183
CON5	2	2	1	-0.0196315	0.226734	0.0971919
CON6	2	2	1	-0.0272616	0.118368	0.415667
CON7	2	2	1	-0.0276748	0.201126	0.0649396
CON8	2	2	1	-0.0869166	-0.177853	0.511405
CON9	2	2	1	-0.0233262	0.207091	0.123451
CON10	2	2	1	-0.0286747	0.202909	0.142758
CON11	2	2	1	-0.0253163	0.198922	0.0310031
CON12	2	2	1	-0.0476778	0.0322851	0.324949
CON13	2	2	1	-0.0242136	0.160617	0.10887
CON14	2	2	1	-0.0101349	0.27898	0.0880257
CON15	2	2	1	0.0551786	0.72032	-0.475946
CON16	2	2	1	0.0186289	0.479478	-0.179529
CON17	1	1	2	-0.772356	-4.83597	5.16548
CON18	2	2	1	-0.0552282	-0.0233336	0.312903
CON19	2	2	1	-0.0237019	0.230427	0.0258991
CON20	2	2	1	-0.0221833	0.220421	0.0863329
CON21	2	2	1	0.00194644	0.417192	-0.0990815
CON22	2	2	1	-0.0215189	0.215047	0.0929626
CON23	2	2	1	-0.0399497	0.119692	0.213607
CON24	2	2	1	-0.0359871	0.153865	0.272827
CON25	2	2	1	0.0122116	0.45636	-0.014342
CON26	2	2	1	-0.0514355	0.0657606	0.0662458
CON27	2	2	1	-0.0271054	0.123773	-0.0040382
CON28	2	2	1	-0.0734933	-0.155177	0.328242
CON29	2	2	1	0.0192821	0.502375	0.0264499
CON30	2	2	1	-0.0267273	0.197196	-0.19272
CON31	2	2	1	-0.0629057	-0.0516141	0.304874
CON32	2	2	1	-0.0106958	0.283954	0.201393
CON33	2	2	1	-0.108172	-0.340137	0.428049
CON34	2	2	1	-0.0277581	0.151995	0.140226
CON35	2	2	1	0.00192277	0.324457	-0.0140145
CON36	2	2	1	-0.0361505	0.0736265	0.560891
CON37	2	2	1	-0.0676438	-0.14094	0.375757
CON38	2	2	1	-0.0295803	0.165052	0.0703761
CON39	2	2	1	-0.057148	-0.0292999	0.20741
CON40	2	2	1	-0.0393727	0.0952894	0.0881961
CON41	2	2	1	-0.0709874	-0.116387	0.357993
CON42	2	2	1	0.0177834	0.480545	-0.0504124
CON43	2	2	1	-0.0122804	0.267353	0.126694
CON44	2	2	1	-0.0520955	-0.0153198	0.259864
CON45	2	2	1	0.0224639	0.519647	-0.0303814
CON46	2	2	1	-0.0424537	0.0353202	0.354664
CON47	2	2	1	-0.0785904	-0.199372	0.316811
CON48	2	2	1	-0.0949591	-0.313412	0.60938
CON49	2	2	1	-0.116715	-0.45319	0.691592
CON50	2	2	1	-0.0276203	0.218164	-0.0462345
CON51	2	2	1	0.0368314	0.610155	-0.440517
CON52	1	1	2	-0.736629	-4.55648	4.71686
CON53	2	2	1	-0.0662196	-0.103227	0.337851
CON54	2	2	1	-0.0590304	-0.0623919	0.353976
CON55	2	2	1	-0.000211224	0.377811	-0.0533644
CON56	2	2	1	-0.00192916	0.289488	-0.0219841
CON57	2	2	1	0.000173308	0.359952	0.0233161
CON58	2	2	1	-0.0229185	0.194677	0.16419
CON59	2	2	1	0.0007234	0.393171	-0.0935662
CON60	2	2	1	-0.0312653	0.1386	0.357644
CON61	2	2	1	0.0344192	0.579271	-0.175866
CON62	2	2	1	-0.012944	0.260369	0.0269051
CON63	2	2	1	0.0080849	0.419601	-0.0943962
CON64	2	2	1	-0.0125713	0.238899	0.0838734
CON65	2	2	1	-0.0332766	0.13721	0.261649
CON66	2	2	1	-0.052815	-0.0355083	0.255819
CON67	2	2	1	-0.0464536	0.0181778	0.284263
CON68	2	2	1	-0.0422389	0.0663251	0.0329683
CON69	2	2	1	-0.00588146	0.272989	0.125852
CON70	2	2	1	-0.0995802	-0.313441	0.398555
CON71	2	2	1	-0.109699	-0.397957	0.750232
CON72	2	2	1	0.00663865	0.334107	0.0461112
CON73	2	2	1	-0.0673349	-0.102453	0.245528
CON74	1	2	1	-0.414974	-1.76045	1.38352
CON75	2	2	1	-0.0573797	-0.0545752	0.209878
CON76	2	2	1	-0.0738272	-0.148368	0.765146
CON77	2	2	1	-0.00780882	0.334559	-0.31302
CON78	2	2	1	-0.026615	0.197387	0.102518
CON79	2	2	1	-0.0257165	0.127236	0.0913821
CON80	1	1	2	-0.700189	-4.40271	4.96147
CON81	2	2	1	-0.0357776	0.111465	0.152187
CON82	2	2	1	-0.0699193	-0.131107	0.624702
CON83	2	2	1	-0.0179818	0.253303	0.0165937
CON84	2	2	1	-0.047709	0.0518848	0.0787672
CON85	2	2	1	-0.0367028	0.0863264	0.268871
CON86	2	2	1	-0.0533769	-0.0362186	0.391828
CON87	2	2	1	-0.0530473	-0.0438544	0.267325
CON88	2	2	1	-0.0684779	-0.0933562	0.249766
CON89	2	2	1	0.030035	0.579421	-0.259124
CON90	2	2	1	-0.0466412	0.0694754	0.0841898
CON91	2	2	1	-0.0309659	0.21169	-0.0110211
CON92	2	2	1	-0.0148185	0.296444	-0.111349
CON93	2	2	1	-0.0132998	0.309696	-0.415933
CON94	2	2	1	0.047874	0.70365	-0.826133
CON95	2	2	1	0.0496678	0.716586	-0.624201
CON96	2	2	1	0.0294938	0.590154	-0.458466
CON97	2	2	1	0.0214706	0.505367	-0.299176
CON98	2	2	1	0.00903528	0.426938	-0.32361
CON99	2	2	1	-0.0358757	0.129624	0.0646434
CON100	2	2	1	-0.0523538	0.0299571	0.321956
CON101	1	1	2	-0.821647	-5.11444	5.31158
CON102	2	2	1	-0.082803	-0.208504	0.469405
CON103	2	2	1	-0.0730767	-0.127462	0.309226
CON104	2	2	1	-0.00570826	0.317971	0.0673492
CON105	2	2	1	-0.0689289	-0.126621	0.539257
CON106	2	2	1	-0.0517512	-0.010939	0.331019
CON107	2	2	1	-0.0167369	0.210895	0.122088
CON108	2	2	1	-0.00312282	0.300399	0.056576
CON109	2	2	1	-0.0216065	0.188062	0.0720268
CON110	2	2	1	-0.047487	-0.0113369	0.270834
CON111	2	2	1	-0.0200098	0.210056	-0.122779
CON112	2	2	1	-0.0327074	0.142962	0.0364058
CON113	2	2	1	-0.13218	-0.622772	0.974974
CON114	2	2	1	0.00523461	0.378109	-0.000519554
CON115	2	2	1	-0.0122519	0.28584	0.0814714
CON116	2	2	1	-0.00837733	0.276537	-0.00374505
CON117	1	1	2	-0.778067	-4.85687	5.04423
CON118	2	2	1	-0.0138265	0.259756	-0.0714494
CON119	2	2	1	-0.012067	0.290492	0.103074
CON120	2	2	1	-0.0359029	0.0929546	0.273815
CON121	2	2	1	0.0453785	0.649762	-0.413225
CON122	2	2	1	0.0823167	0.930437	-0.559871
CON123	2	2	1	-0.0066478	0.351228	-0.189864
CON124	2	2	1	0.0260646	0.599394	-0.222442
CON125	2	2	1	-0.0530212	0.0291943	0.397475
CON126	2	2	1	-0.0233027	0.226518	0.133647
CON127	1	1	2	-0.511796	-3.20579	3.64132
CON128	2	2	1	-0.0290648	0.16726	0.118697
CON129	2	2	1	0.0322837	0.545034	-0.066176
CON130	2	2	1	-0.0395994	0.0971623	0.14651
CON131	2	2	1	0.0498741	0.682754	-0.261995
CON132	2	2	1	0.0110009	0.403488	0.0100803
CON133	2	2	1	0.019581	0.451637	-0.131734
CON134	2	2	1	-0.00606283	0.312285	-0.00491308
CON135	2	2	1	-0.0583231	-0.0291023	0.410897
CON136	2	2	1	0.0139575	0.426623	-0.0613733
CON137	2	2	1	-0.00835953	0.320289	-0.0466388
CON138	2	2	1	-0.0350114	0.0915468	0.199561
CON139	2	2	1	-0.00358197	0.30318	-0.24724
CON140	2	2	1	-0.0392511	0.071552	0.261221
CON141	2	2	1	0.0159704	0.496808	-0.153515
CON142	2	2	1	0.0276567	0.545514	-0.330114
CON143	2	2	1	-0.0265615	0.174683	0.0915366
CON144	2	2	1	-0.0611432	-0.0441318	0.3344
CON145	2	2	1	-0.0109675	0.271698	0.145119
CON146	2	2	1	-0.00619387	0.301612	0.101157
CON147	2	2	1	-0.089123	-0.192437	0.349659
CON148	2	2	1	-0.0386431	0.12878	0.0604108
CON149	2	2	1	-0.0196181	0.244717	0.0179321
CON150	2	2	1	-0.0648717	-0.0530227	0.166866
CON151	2	2	1	-0.0188961	0.233598	0.00226928
CON152	2	2	1	-0.0818719	-0.191449	0.472496
CON153	2	2	1	-0.0544102	-0.00879933	0.183709
CON154	1	1	2	-0.598651	-3.70371	4.08922
CON155	2	2	1	-0.0464982	0.0770283	0.247706
CON156	2	2	1	0.0122058	0.405264	-0.0335892
CON157	2	2	1	-0.0235996	0.149084	0.205451
CON158	2	2	1	-0.0315117	0.117069	0.0906837
CON159	2	2	1	0.0124993	0.449757	-0.137028
CON160	2	2	1	0.0207687	0.517172	-0.0212808
CON161	2	2	1	-0.0313348	0.169083	0.0893338
CON162	2	2	1	-0.0238448	0.0933965	0.139109
CON163	2	2	1	-0.0252661	0.202361	0.185423
CON164	2	2	1	0.0114261	0.429711	-0.18822
CON165	2	2	1	-0.0607144	-0.0823835	0.457381
CON166	2	2	1	-0.0249331	0.177186	0.232545
CON167	2	2	1	-0.0846485	-0.202837	0.437891
CON168	2	2	1	-0.0387793	0.0937701	0.414581
CON169	2	2	1	0.0135906	0.439949	-0.0408513
CON170	2	2	1	-0.00975648	0.306135	0.0758887
CON171	2	2	1	-0.0264847	0.156921	0.139125
CON172	2	2	1	-0.0372794	0.0808092	0.327216
CON173	2	2	1	-0.0389941	0.0539706	0.245689
CON174	2	2	1	0.0340438	0.500101	0.00593005
CON175	2	2	1	-0.0185206	0.191343	0.27017
CON176	2	2	1	-0.031322	0.162756	0.152776
CON177	2	2	1	-0.0231478	0.262777	-0.0432785
CON178	2	2	1	0.00931217	0.394504	-0.0872797
CON179	2	2	1	-0.0247801	0.158903	0.106991
CON180	2	2	1	0.0282318	0.491574	-0.00424671
CON181	2	2	1	-0.0305815	0.0747603	0.399198
CON182	2	2	1	-0.0688196	-0.0768169	0.315159
CON183	2	2	1	-0.00914229	0.294547	-0.061697
CON184	1	1	2	-0.826466	-5.15155	5.39643
CON185	2	2	1	-0.00010145	0.368112	-0.00241394
CON186	2	2	1	0.0248957	0.571596	-0.346448
CON187	2	2	1	0.0225667	0.578523	-0.352044
CON188	2	2	1	0.0096616	0.50925	-0.216447
CON189	2	2	1	-0.0345197	0.216101	0.0690031
CON190	2	2	1	-0.0444334	0.110782	0.420046
CON191	2	2	1	0.0453429	0.759546	-0.483144
CON192	2	2	1	0.0267186	0.566427	-0.225925
CON193	2	2	1	-0.00231105	0.282402	0.157195
CON194	1	1	2	-0.668913	-4.11978	4.60326
CON195	2	2	1	-0.0295902	0.192558	-9.17336e-05
CON196	2	2	1	0.0336146	0.557953	-0.29935
CON197	2	2	1	0.0157541	0.459841	-0.0339079
CON198	2	2	1	-0.00441715	0.371084	0.0262209
CON199	2	2	1	-0.0466905	0.0744842	0.40961
CON200	2	2	1	-0.0263045	0.185467	0.0652122
CON201	2	2	1	-0.125471	-0.480153	0.718855
CON202	2	2	1	0.0268166	0.499491	-0.0497535
CON203	2	2	1	-0.112969	-0.407013	0.40838
CON204	2	2	1	-0.00512845	0.364702	0.120737
CON205	2	2	1	-0.0125478	0.306538	0.180388
CON206	2	2	1	0.0172317	0.452405	-0.291156
CON207	2	2	1	-0.0309077	0.195031	0.0158678
CON208	2	2	1	-0.0183568	0.220087	-0.0205102
CON209	2	2	1	-0.00870921	0.312973	-0.355834
CON210	2	2	1	0.0521405	0.666724	-0.261564
CON211	2	2	1	-0.0216503	0.199624	0.135134
CON212	2	2	1	0.00758739	0.404307	-0.138956
CON213	2	2	1	-0.0365269	0.121243	0.235977
CON214	2	2	1	-0.140101	-0.522161	0.583041
CON215	2	2	1	-0.0102876	0.327538	-0.0549956
CON216	2	2	1	-0.00686925	0.333977	0.125563
CON217	2	2	1	-0.0145911	0.264986	0.022649
CON218	2	2	1	-0.0182968	0.257547	-0.102124
CON219	2	2	1	-0.0562223	0.000183283	0.30289
CON220	2	2	1	-0.00623718	0.325043	-0.172207
CON221	2	2	1	-0.0510519	0.00634888	0.339134
CON222	2	2	1	-0.0105436	0.275513	0.147973
CON223	2	2	1	-0.0334344	0.125265	0.394188
CON224	2	2	1	0.0184493	0.498328	-0.169263
CON225	2	2	1	-0.0216811	0.205633	0.0848066
CON226	2	2	1	0.012357	0.458703	-0.0794947
CON227	2	2	1	0.0384481	0.628282	-0.172519
CON228	2	2	1	0.00628613	0.418214	-0.0278647
CON229	2	2	1	-0.0117225	0.298665	0.0547454
CON230	2	2	1	0.00511402	0.398052	0.0922927
CON231	2	2	1	-0.0177687	0.250669	0.138195
CON232	2	2	1	-0.0280996	0.188138	0.406822
CON233	2	2	1	-0.0411553	0.116494	0.260163
CON234	2	2	1	0.0187718	0.492222	-0.0304025
CON235	2	2	1	0.0295856	0.604804	-0.120113
CON236	2	2	1	-0.0109183	0.276431	0.115834
CON237	2	2	1	0.058916	0.774659	-0.0338359
CON238	2	2	1	-0.00564825	0.327519	0.216707
CON239	2	2	1	-0.0133119	0.250188	0.055226
CON240	2	2	1	-0.0200274	0.209444	0.071269
CON241	2	2	1	-0.0468435	0.0501361	0.248698
CON242	2	2	1	-0.0132096	0.278469	-0.0528309
CON243	2	2	1	-0.00520568	0.310559	-0.00610396
CON244	2	2	1	-0.0347163	0.124395	0.127806
CON245	2	2	1	-0.0122024	0.298535	0.0322377
CON246	2	2	1	0.00696605	0.421656	-0.196729
CON247	2	2	1	-0.0211561	0.222087	0.00556903
CON248	2	2	1	0.00122917	0.381809	0.00230503
CON249	2	2	1	-0.00126621	0.351403	-0.12203
CON250	2	2	1	-0.0192481	0.236332	0.0251689
CON251	2	2	1	0.0223768	0.513981	0.00521941
CON252	2	2	1	0.0244454	0.521515	-0.0853521
CON253	2	2	1	0.0642671	0.815022	-0.282973
CON254	2	2	1	0.033061	0.604498	-0.0123908
CON255	2	2	1	0.0386192	0.658983	-0.0949029
CON256	2	2	1	0.0309592	0.558004	-0.0465187
CON257	2	2	1	0.015699	0.452169	-0.00671277
CON258	2	2	1	-0.0456496	0.0873455	0.364676
CON259	2	2	1	0.0113517	0.458168	0.0178533
CON260	2	2	1	-0.0142946	0.291497	0.0227806
CON261	2	2	1	0.00251019	0.400779	-0.13843
CON262	2	2	1	-0.0136887	0.275989	0.102347
CON263	2	2	1	-0.0170759	0.271266	-0.116918
CON264	2	2	1	-0.0256907	0.170407	0.117554
CON265	2	2	1	-0.0679768	-0.0480908	0.396526
CON266	2	2	1	-0.0706553	-0.0946182	0.297773
CON267	2	2	1	-0.0541093	0.0035707	0.319232
CON268	2	2	1	-0.0328185	0.144546	0.149106
CON269	2	2	1	-0.0318912	0.133124	0.0747774
CON270	2	2	1	-0.0726	-0.13856	0.409567
CON271	2	2	1	-0.0390937	0.103586	0.256388
CON272	2	2	1	-0.0377079	0.16416	0.0995554
CON273	2	2	1	-0.087663	-0.167788	0.437957
CON274	2	2	1	-0.0673059	-0.0882903	0.325849
CON275	2	2	1	-0.010355	0.297335	-0.173881
CON276	2	2	1	0.0324373	0.632277	-0.246116
CON277	2	2	1	-0.100201	-0.273911	0.514604
CON278	2	2	1	-0.0278458	0.156201	0.194715
CON279	2	2	1	-0.0217644	0.205946	0.188161
CON280	2	2	1	-0.0802959	-0.14951	0.376783
CON281	2	2	1	-0.0131749	0.270185	-0.166991
CON282	2	2	1	0.0464025	0.670631	-0.245256
CON283	2	2	1	0.0327401	0.567176	-0.132531
CON284	2	2	1	-0.0272666	0.201389	-0.0169124
CON285	2	2	1	-0.0669666	-0.0967942	0.338878
CON286	2	2	1	0.0656635	0.799039	-0.369908
CON287	2	2	1	0.0152174	0.464455	-0.0619641
CON288	2	2	1	-0.000128954	0.342101	0.0322268
CON289	2	2	1	-0.0016134	0.331342	0.0302284
CON290	2	2	1	0.00853092	0.398289	-0.139183
CON291	2	2	1	-0.00559514	0.301053	0.137555
CON292	2	2	1	-0.0120305	0.322985	-0.00703711
CON293	2	2	1	-0.012091	0.283793	-0.0974643
CON294	2	2	1	0.028476	0.535223	-0.313995
CON295	2	2	1	-0.00876338	0.25053	0.0775391
CON296	2	2	1	-0.0215989	0.213762	-0.0422093
CON297	1	1	2	-0.930756	-5.76356	5.98206
CON298	1	1	2	-0.865923	-5.43569	5.50086
CON299	2	2	1	-0.0431775	0.0630047	0.281299
CON300	2	2	1	-0.0404159	0.0424436	0.204202
CON301	2	2	1	-0.0223972	0.19164	0.175746
CON302	2	2	1	-0.0411553	0.124674	0.152951
CON303	2	2	1	-0.0221049	0.143616	0.0501606
CON304	2	2	1	-0.055011	0.00931585	0.262815
CON305	2	2	1	-0.0315033	0.15121	0.232843
CON306	2	2	1	-0.0281234	0.149704	0.21478
CON307	2	2	1	-0.0278898	0.187189	0.174518
CON308	2	2	1	-0.0634651	-0.0974665	0.304958
CON309	2	2	1	-0.0491686	0.0339607	0.274283
CON310	2	2	1	0.0546819	0.777754	-0.235039
CON311	2	2	1	0.00042795	0.383493	-0.0712884
CON312	2	2	1	-0.0113454	0.289698	0.00272673
CON313	2	2	1	-0.021582	0.241504	0.152127
CON314	2	2	1	-0.088158	-0.230892	0.150997
CON315	2	2	1	-0.0154375	0.296684	0.20034
CON316	2	2	1	-0.113655	-0.464775	0.635889
CON317	2	2	1	0.00921988	0.453974	-0.246811
CON318	2	2	1	-0.0418928	0.106029	0.0525124
CON319	2	2	1	0.0292684	0.631323	-0.613965
CON320	2	2	1	-0.0116545	0.225302	0.176258
CON321	2	2	1	-0.0152277	0.294781	0.0611207
CON322	2	2	1	-0.0196504	0.242198	0.219503
CON323	2	2	1	-0.0180668	0.21238	0.193448
CON324	2	2	1	-0.0289626	0.15007	0.354862
CON325	2	2	1	-0.00946882	0.308081	-0.168703
CON326	2	2	1	-0.0132339	0.287992	0.052966
CON327	2	2	1	-0.0392503	0.0887139	0.232785
CON328	2	2	1	0.0457012	0.770291	-0.462694
CON329	2	2	1	-0.0456515	0.0175806	0.42786
CON330	2	2	1	-0.0316812	0.156642	0.140493
CON331	2	2	1	-0.0640233	-0.114968	0.476146
CON332	2	2	1	-0.0408987	0.0285069	0.186485
CON333	2	2	1	-0.00467152	0.340251	0.117416
CON334	2	2	1	-0.0529103	-0.0135137	0.168962
CON335	2	2	1	-0.106119	-0.367097	0.448173
CON336	2	2	1	-0.0797214	-0.169152	0.244933
CON337	2	2	1	-0.0589037	-0.0948994	0.246702
CON338	2	2	1	-0.10521	-0.377452	0.636136
CON339	2	2	1	-0.0245888	0.190481	0.216031
CON340	2	2	1	-0.0444063	0.0658782	0.178589
CON341	2	2	1	-0.0378467	0.115585	-0.0411761
CON342	2	2	1	-0.0322432	0.140129	-0.0715507
CON343	2	2	1	-0.0560104	-0.0331568	0.220166
CON344	2	2	1	-0.0820148	-0.22511	0.201589
CON345	2	2	1	-0.0415598	0.119644	0.034786
CON346	2	2	1	-0.0311872	0.128345	0.132728
CON347	2	2	1	-0.0282132	0.232555	-0.0692444
CON348	2	2	1	-0.0750492	-0.089103	-0.146494
CON349	2	2	1	-0.120725	-0.397686	0.511298
CON350	2	2	1	-0.0551368	0.0263144	0.404598
CON351	2	2	1	-0.0825636	-0.0898378	0.320162
CON352	1	1	2	-0.798132	-4.90224	5.02726
CON353	2	2	1	-0.0480922	0.0292019	0.261654
CON354	2	2	1	0.024021	0.515024	-0.217113
CON355	2	2	1	-0.0196627	0.207619	0.123425
CON356	2	2	1	-0.00709209	0.281304	0.0766719
CON357	2	2	1	-0.00803585	0.263097	0.00922413
CON358	2	2	1	-0.0483246	0.120664	0.143203
CON359	2	2	1	-0.123559	-0.364387	0.45878
CON360	2	2	1	-0.0591864	0.0420753	0.112101
CON361	2	2	1	-0.0565696	-0.0129589	0.228392
CON362	2	2	1	-0.0367901	0.0670315	0.178155
CON363	2	2	1	0.022206	0.507523	-0.115095
CON364	2	2	1	-0.0315911	0.132269	0.15212
CON365	2	2	1	-0.021846	0.220868	-0.00124246
CON366	2	2	1	-0.0105332	0.260101	0.122055
CON367	2	2	1	-0.0277902	0.172685	0.0822633
CON368	2	2	1	0.00507876	0.388163	-0.0966349
CON369	2	2	1	-0.0230511	0.221276	0.0376858
CON370	2	2	1	-0.0305208	0.171121	0.201203
CON371	2	2	1	-0.0573956	-0.0187358	0.283059
CON372	2	2	1	-0.0748232	-0.141768	0.430331
CON373	2	2	1	-0.00664705	0.279395	0.0969965
CON374	2	2	1	-0.0103944	0.297437	-0.0546205
CON375	2	2	1	-0.0105934	0.322563	-0.0599716
CON376	2	2	1	-0.0172238	0.29602	0.0618895
CON377	2	2	1	-0.0356796	0.115588	0.274162
CON378	2	2	1	-0.0489423	0.0239251	0.195659
CON379	2	2	1	-0.0183958	0.218358	0.25809
CON380	2	2	1	0.0220986	0.530015	0.0340275
CON381	2	2	1	-0.0881359	-0.255323	0.408027
CON382	2	2	1	-0.0406096	0.1001	0.209664
CON383	2	2	1	-0.023911	0.200923	0.04913
CON384	2	2	1	-0.0410234	0.1445	0.295098
CON385	2	2	1	-0.040634	0.111946	0.117923
CON386	2	2	1	-0.0619377	-0.019005	0.103603
CON387	2	2	1	-0.0115987	0.353083	-0.158646
CON388	2	2	1	-0.104343	-0.307735	0.298449
CON389	2	2	1	-0.0745626	-0.117257	0.240707
CON390	2	2	1	-0.104796	-0.313284	0.285381
CON391	2	2	1	-0.0312243	0.18133	0.0609641
CON392	2	2	1	-0.0445049	0.0964133	0.154818
CON393	2	2	1	-0.0570177	-0.00525133	0.221229
CON394	2	2	1	0.00630206	0.363545	-0.0850578
CON395	2	2	1	-0.00366599	0.307144	-0.0990864
CON396	2	2	1	-0.0566214	-0.00217542	0.147897
CON397	2	2	1	-0.00958062	0.27811	-0.0240689
CON398	2	2	1	-0.0532322	0.0213055	0.192454
CON399	2	2	1	-0.0454032	0.099915	0.0416844
CON400	2	2	1	-0.0408968	0.0674321	0.254308
CON401	2	2	1	-0.00629992	0.398646	-0.190423
CON402	2	2	1	0.00400085	0.392457	-0.283713
CON403	2	2	1	-0.0739665	-0.0646491	0.147947
CON404	2	2	1	-0.0190972	0.265148	-0.134529
CON405	2	2	1	0.0167715	0.516497	-0.381572
CON406	2	2	1	0.0161262	0.467868	-0.114523
CON407	2	2	1	-0.00775526	0.323428	-0.0725031
CON408	2	2	1	-0.0357562	0.101674	0.169105
CON409	2	2	1	-0.0478801	0.0878637	0.126989
CON410	2	2	1	0.00544324	0.412152	-0.0712755
CON411	2	2	1	-0.0407351	0.0779479	0.121681
CON412	2	2	1	0.00152906	0.339006	0.0170105
CON413	2	2	1	-0.0184988	0.238142	-0.0253854
CON414	1	1	2	-0.697726	-4.33059	4.80586
CON415	2	2	1	-0.0148529	0.266531	0.0591199
CON416	2	2	1	-0.00975852	0.290284	0.0198984
CON417	2	2	1	-0.0407729	0.086032	0.285057
CON418	2	2	1	-0.013227	0.271393	0.0333341
CON419	2	2	1	0.0270518	0.541954	-0.175469
CON420	2	2	1	0.0374895	0.632689	-0.237913
CON421	2	2	1	-0.00922569	0.296334	0.0783565
CON422	2	2	1	0.00406425	0.410048	0.0813943
CON423	2	2	1	0.00772937	0.433187	-0.106067
CON424	2	2	1	0.0438511	0.666174	-0.168854
CON425	2	2	1	0.00213613	0.422993	-0.0368232
CON426	2	2	1	0.0176431	0.481211	-0.0675492
CON427	2	2	1	-0.0472518	0.0366413	0.100356
CON428	2	2	1	-0.0338865	0.174302	0.190644
CON429	2	2	1	0.0294372	0.529994	0.123965
CON430	2	2	1	-0.0284608	0.193468	0.0347303
CON431	2	2	1	-0.0505748	0.0280802	0.233281
CON432	2	2	1	-0.0107059	0.311131	-0.144709
CON433	2	2	1	-0.00230968	0.34917	-0.113949
CON434	2	2	1	-0.0293761	0.169653	0.132005
CON435	2	2	1	-0.0138047	0.249082	0.225993
CON436	2	2	1	-0.0384025	0.096598	0.22951
CON437	2	2	1	-0.00164497	0.321607	0.0797865
CON438	2	2	1	-0.0104199	0.303527	0.121365
CON439	2	2	1	0.0128289	0.481841	-0.0139693
CON440	2	2	1	-0.0147834	0.289995	0.164277
CON441	2	2	1	-0.0157539	0.254309	0.0470412
CON442	2	2	1	-0.00982762	0.28918	0.0526792
CON443	2	2	1	-0.0318596	0.105853	0.210441
CON444	2	2	1	-0.0255853	0.191764	0.115263
CON445	2	2	1	-0.0192192	0.240174	0.157075
CON446	2	2	1	-0.0666725	-0.0685103	0.264771
CON447	2	2	1	-0.0226353	0.187389	0.0805668
CON448	2	2	1	0.0146732	0.459336	-0.155515
CON449	2	2	1	-0.00240703	0.349563	0.00557578
CON450	2	2	1	-0.0411576	0.100961	0.15583
CON451	1	1	2	-0.785338	-4.91407	5.21702
CON452	2	2	1	-0.0223625	0.161381	0.102852
CON453	2	2	1	-0.0288142	0.170313	0.162334
CON454	2	2	1	-0.0179695	0.225106	0.118082
CON455	2	2	1	0.00222387	0.356738	-0.0252447
CON456	2	2	1	-0.025979	0.202494	-0.00145383
CON457	2	2	1	-0.0273921	0.155337	0.125634
CON458	2	2	1	-0.0266674	0.21569	0.105838
CON459	2	2	1	0.00446034	0.356494	-0.0632
CON460	2	2	1	-0.027503	0.184101	0.120028
CON461	2	2	1	-0.0778493	-0.237975	0.468227
CON462	2	2	1	0.00459704	0.41039	-0.0671338
CON463	2	2	1	0.0359295	0.582305	-0.0958269
CON464	2	2	1	0.0454801	0.603782	-0.0582324
CON465	2	2	1	-0.0643644	-0.0810764	0.315858
CON466	2	2	1	0.0055318	0.382822	0.111976
CON467	2	2	1	0.00507414	0.404471	-0.0895146

## Sheet: chr11_85981796_85983048
IDV	CNV genotype			Signal Intensity (log2 ratio)
	Raw	PCA	LDF	Raw	PCA	LDF
CASE1	3	3	1	-0.144975	0.239819	0.372459
CASE2	3	3	1	0.076022	0.830251	-0.208559
CASE3	3	3	1	0.0611207	0.799718	-0.198986
CASE4	3	3	1	0.0815498	0.845597	-0.21695
CASE5	3	2	2	-0.403603	-0.546843	1.18379
CASE6	3	2	2	-0.469861	-0.754272	1.40092
CASE7	3	2	2	-0.305283	-0.266779	0.894927
CASE8	3	3	1	0.0333837	0.702559	-0.0326532
CASE9	3	2	2	-0.479333	-0.834584	1.45612
CASE10	1	1	3	-1.31115	-3.17944	3.7181
CASE11	1	1	3	-1.52521	-3.77483	4.12095
CASE12	1	1	3	-1.51742	-3.70323	4.18789
CASE13	3	2	2	-0.421106	-0.636513	1.26016
CASE14	1	1	3	-1.72872	-4.39201	4.91572
CASE15	3	3	1	0.0344613	0.696834	-0.101722
CASE16	1	1	3	-0.865261	-1.83504	2.5052
CASE17	3	3	1	0.0611064	0.775353	-0.143601
CASE18	3	3	1	0.0202564	0.655429	-0.00792007
CASE19	1	1	3	-0.827597	-1.71879	2.45055
CASE20	3	3	1	0.0905177	0.894571	-0.274686
CASE21	1	2	2	-0.642863	-1.14256	1.93287
CASE22	3	3	2	-0.171193	0.116603	0.523343
CASE23	3	3	1	0.0595661	0.774195	-0.199431
CASE24	3	3	1	-0.0984813	0.380873	0.323619
CASE25	3	3	1	0.0614234	0.821947	-0.195566
CASE26	3	3	1	0.118217	0.968244	-0.411885
CASE27	3	2	2	-0.306273	-0.289977	0.953649
CASE28	3	3	1	0.0327372	0.683726	-0.149709
CASE29	3	2	2	-0.27767	-0.22764	0.823293
CASE30	3	3	1	0.0204096	0.647513	-0.0382407
CASE31	3	3	1	0.0202383	0.648961	0.032055
CASE32	3	3	1	0.0389319	0.722572	-0.102534
CASE33	3	3	1	0.0582897	0.716176	-0.0415518
CASE34	3	3	1	0.0939662	0.893145	-0.177605
CASE35	1	1	3	-1.19623	-2.97412	3.39834
CASE36	3	3	1	0.0661372	0.796952	-0.187053
CASE37	3	3	2	-0.182853	0.0918441	0.546999
CASE38	3	3	1	-0.155284	0.181167	0.455445
CASE39	3	3	1	-0.163987	0.173847	0.476199
CASE40	3	3	2	-0.166855	0.132752	0.608242
CASE41	3	3	1	-0.135585	0.165087	0.49262
CASE42	3	3	1	0.111057	0.908057	-0.239118
CASE43	3	2	2	-0.411689	-0.579078	1.16167
CASE44	3	3	2	-0.162536	0.116119	0.599134
CASE45	3	3	2	-0.196124	0.00449494	0.704141
CASE46	3	3	2	-0.21554	0.00640956	0.653901
CASE47	3	3	1	0.119204	0.975695	-0.346174
CASE48	3	3	1	0.106513	0.878332	-0.183879
CASE49	3	2	2	-0.241261	-0.0675818	0.858991
CASE50	3	3	2	-0.160512	0.203949	0.499097
CASE51	1	2	3	-0.722538	-1.38915	2.14096
CASE52	3	3	1	-0.169701	0.117231	0.468472
CASE53	3	3	1	0.0382407	0.710546	-0.0141885
CASE54	3	3	1	0.110438	0.907419	-0.199035
CASE55	3	3	1	0.11211	0.979853	-0.243029
CASE56	3	3	2	-0.203969	0.0767835	0.634419
CASE57	3	3	1	0.102531	0.901647	-0.153731
CASE58	3	2	2	-0.237702	-0.030711	0.676136
CASE59	3	3	1	-0.114553	0.308889	0.363258
CASE60	3	2	2	-0.244446	-0.127183	0.76619
CASE61	3	3	1	0.0918109	0.874354	-0.196626
CASE62	3	3	1	0.102589	0.939276	-0.283418
CASE63	1	1	3	-0.828344	-1.68906	2.36337
CASE64	3	3	1	0.11447	0.978058	-0.365449
CASE65	1	1	3	-0.891826	-1.93346	2.70962
CASE66	3	3	1	0.133651	1.01618	-0.434664
CASE67	1	1	3	-0.987718	-2.18216	2.75716
CASE68	3	3	1	0.012862	0.680961	-0.0571084
CASE69	3	3	1	-0.188739	0.0991428	0.47329
CASE70	3	3	1	0.116859	0.929343	-0.281531
CASE71	3	2	2	-0.274243	-0.170348	0.913902
CASE72	3	3	1	0.144797	1.01617	-0.439543
CASE73	3	3	1	0.034195	0.703274	-0.0402058
CASE74	3	3	1	-0.0374397	0.535199	-0.00930028
CASE75	3	3	1	0.02266	0.634667	-0.0769382
CASE76	3	3	1	0.0518338	0.733921	-0.0558539
CASE77	3	3	1	0.0230476	0.63534	-0.0425339
CASE78	3	2	2	-0.334682	-0.383704	0.957992
CASE79	3	3	1	-0.0877902	0.360796	0.258839
CASE80	3	3	1	0.0278508	0.682153	-0.0448373
CASE81	3	3	1	0.102924	0.865057	-0.347355
CASE82	3	3	1	0.0500833	0.750017	-0.0263929
CASE83	1	1	3	-0.743155	-1.51813	2.23181
CASE84	3	3	1	0.0576285	0.823471	-0.104954
CASE85	3	3	1	0.032921	0.728258	-0.00728353
CASE86	3	3	1	-0.00162889	0.527178	0.0951944
CASE87	3	3	1	0.042135	0.676436	-0.0271462
CASE88	3	2	2	-0.38742	-0.494582	1.07149
CASE89	3	3	1	-0.118588	0.32705	0.345833
CASE90	3	3	1	-0.123842	0.271328	0.467127
CASE91	3	3	2	-0.188073	0.0767434	0.581129
CASE92	3	3	1	-0.0415938	0.515041	0.12784
CASE93	3	3	1	0.0946637	0.848385	-0.300713
CASE94	3	3	1	0.0541029	0.741573	-0.282381
CASE95	3	3	2	-0.201289	0.0497868	0.57655
CASE96	3	3	1	0.0376424	0.740187	-0.15407
CASE97	3	2	2	-0.372187	-0.479098	1.129
CASE98	3	3	1	0.0970933	0.932141	-0.310096
CASE99	3	2	2	-0.461073	-0.637957	1.35997
CASE100	3	3	1	0.0831359	0.8118	-0.207435
CASE101	3	3	2	-0.163583	0.128579	0.524679
CASE102	3	2	2	-0.29651	-0.215755	0.823449
CASE103	3	3	1	0.00541856	0.58625	-0.00268824
CASE104	3	2	2	-0.500554	-0.830368	1.38195
CASE105	3	3	1	0.0185603	0.624837	0.17647
CASE106	3	2	2	-0.476767	-0.801536	1.33636
CASE107	3	3	1	-0.0239599	0.488731	0.168725
CASE108	1	1	3	-0.923465	-1.93824	2.91688
CASE109	3	2	2	-0.35963	-0.424631	1.11473
CASE110	3	2	2	-0.37303	-0.488355	1.14386
CASE111	1	1	3	-1.45764	-3.53938	3.93721
CASE112	3	3	1	0.0148333	0.640715	-0.0738283
CASE113	3	3	1	0.0714893	0.745879	-0.0309952
CASE114	3	3	1	0.0815805	0.810674	-0.181551
CASE115	3	2	2	-0.338522	-0.400104	1.12996
CASE116	3	3	2	-0.181474	0.0990325	0.665706
CASE117	3	3	1	0.0593921	0.747037	-0.123351
CASE118	3	2	2	-0.319742	-0.350463	1.02589
CASE119	3	3	2	-0.178417	0.112374	0.497686
CASE120	3	3	1	0.0462042	0.702477	0.0340131
CASE121	3	3	1	0.101891	0.909147	-0.299007
CASE122	3	2	2	-0.330846	-0.365814	1.01471
CASE123	3	2	2	-0.367296	-0.456891	1.11792
CASE124	3	2	2	-0.254937	-0.107747	0.757583
CASE125	3	3	1	0.0745065	0.802182	-0.145075
CASE126	3	3	1	0.0461012	0.712379	-0.0106247
CASE127	3	3	1	0.0858486	0.853378	-0.198251
CASE128	1	1	3	-1.16526	-2.77988	3.39828
CASE129	3	3	1	0.0629285	0.778186	-0.187597
CASE130	3	2	2	-0.538967	-0.878112	1.55102
CASE131	1	1	3	-1.01037	-2.3035	3.04913
CASE132	1	2	3	-0.708252	-1.49205	2.2059
CASE133	3	3	2	-0.174012	0.0625465	0.631787
CASE134	3	3	1	-0.0103088	0.587895	0.110456
CASE135	3	3	1	0.0670457	0.823766	-0.172634
CASE136	3	3	2	-0.172051	0.109875	0.562803
CASE137	1	2	3	-0.753612	-1.44187	2.18401
CASE138	3	3	1	-0.10256	0.387564	0.247718
CASE139	3	2	2	-0.269223	-0.175542	0.89796
CASE140	3	2	2	-0.358588	-0.399364	0.969942
CASE141	3	2	2	-0.356495	-0.420877	1.10305
CASE142	3	3	1	0.0499384	0.72843	-0.15226
CASE143	3	3	1	0.0684855	0.809414	-0.171258
CASE144	3	3	1	0.041553	0.756324	-0.0670473
CASE145	3	3	1	0.137514	1.06241	-0.378467
CASE146	3	3	1	0.0293621	0.724415	-0.0819941
CASE147	3	3	1	0.0757671	0.817342	-0.154922
CASE148	3	3	1	0.042587	0.71604	-0.0787621
CASE149	3	3	1	0.0813882	0.861497	-0.155591
CASE150	3	2	2	-0.377385	-0.519648	1.15484
CASE151	3	3	2	-0.161094	0.143107	0.505988
CASE152	3	3	2	-0.195551	0.0873328	0.601845
CASE153	3	2	2	-0.444056	-0.714097	1.33287
CASE154	3	3	2	-0.160722	0.209014	0.518669
CASE155	3	3	1	0.0567937	0.783542	-0.121154
CASE156	3	3	1	0.0957538	0.927809	-0.307988
CASE157	3	2	2	-0.295263	-0.231849	0.872862
CASE158	3	2	2	-0.436011	-0.508478	1.19863
CASE159	3	3	1	0.0793238	0.842652	-0.252581
CASE160	3	2	2	-0.324754	-0.326491	1.01403
CASE161	3	3	1	0.010526	0.611074	-0.0215123
CASE162	3	3	2	-0.215079	0.0226284	0.64235
CASE163	3	2	2	-0.508637	-0.799258	1.55811
CASE164	3	3	1	0.141325	1.04261	-0.181563
CASE165	3	3	1	0.0512125	0.72718	-0.0961909
CASE166	3	2	2	-0.306754	-0.275355	0.999989
CASE167	3	3	1	0.0370688	0.659203	-0.0452366
CASE168	1	1	3	-1.04538	-2.39196	2.97984
CASE169	3	3	1	0.0806113	0.775552	-0.0782356
CASE170	3	3	2	-0.208032	0.0276772	0.745009
CASE171	3	2	2	-0.216192	-0.0316132	0.730618
CASE172	3	3	1	0.0526093	0.726332	-0.140566
CASE173	3	3	1	0.0699211	0.79361	-0.168028
CASE174	1	1	3	-1.1216	-2.6519	3.29294
CASE175	3	3	1	0.057341	0.728834	-0.135115
CASE176	3	2	2	-0.245548	-0.132361	0.808557
CASE177	3	3	1	0.0681224	0.815082	-0.194574
CASE178	1	2	2	-0.695307	-1.36317	2.03177
CASE179	3	3	1	-0.132464	0.239997	0.482623
CASE180	3	3	1	-0.0897381	0.42547	0.218524
CASE181	1	2	2	-0.652897	-1.22916	1.8856
CASE182	3	3	1	-0.0913734	0.348109	0.239889
CASE183	3	3	1	-0.0240187	0.539082	0.0217564
CASE184	3	2	2	-0.289822	-0.223833	0.858658
CASE185	3	2	2	-0.288908	-0.246908	0.836964
CASE186	3	3	1	0.0954207	0.873228	-0.233077
CASE187	3	3	1	0.0472774	0.691491	-0.135136
CASE188	3	3	1	0.0619367	0.763714	-0.110609
CASE189	3	3	1	0.0721268	0.800422	-0.198573
CASE190	3	3	1	0.0746535	0.846571	-0.223264
CASE191	3	3	1	0.0856838	0.876851	-0.257528
CASE192	3	3	1	0.059654	0.778861	-0.173512
CASE193	3	3	1	-0.11913	0.256187	0.377764
CASE194	3	2	2	-0.268606	-0.214856	0.791355
CASE195	1	2	3	-0.738212	-1.40808	2.17644
CASE196	3	3	1	0.0778431	0.803171	-0.062702
CASE197	3	2	2	-0.343768	-0.397368	0.999134
CASE198	3	3	1	-0.10982	0.314336	0.244011
CASE199	3	3	1	0.0620118	0.803108	-0.193412
CASE200	3	2	2	-0.26534	-0.166558	0.807163
CASE201	3	2	2	-0.33128	-0.360309	0.952547
CASE202	3	3	1	0.0719073	0.815287	-0.146622
CASE203	3	3	1	0.105502	0.893542	-0.246943
CASE204	3	2	2	-0.244984	-0.128761	0.651862
CASE205	3	3	1	-0.147538	0.206214	0.439534
CASE206	3	2	2	-0.320146	-0.351479	0.985191
CASE207	3	2	2	-0.305726	-0.303788	0.827969
CASE208	3	2	2	-0.303369	-0.286422	0.917526
CASE209	3	3	1	0.0196535	0.653157	-0.042254
CASE210	3	2	2	-0.241456	-0.126761	0.800823
CASE211	3	3	1	-0.0388463	0.524519	0.116604
CASE212	3	2	2	-0.238068	-0.0758543	0.712883
CASE213	3	3	1	0.0158871	0.641417	0.00583787
CASE214	3	3	1	0.0413013	0.728157	-0.2231
CASE215	3	3	2	-0.162459	0.140039	0.502204
CASE216	1	1	3	-0.784993	-1.7108	2.23617
CASE217	3	3	1	0.112149	0.936888	-0.259177
CASE218	3	3	1	0.0341569	0.647688	-0.0418577
CASE219	3	2	2	-0.309515	-0.24631	0.912151
CASE220	3	3	1	-0.163615	0.122682	0.463649
CASE221	3	2	2	-0.380928	-0.506305	1.25358
CASE222	3	3	1	0.0764065	0.821881	-0.205304
CASE223	3	3	1	-0.0876295	0.353331	0.284945
CASE224	3	3	2	-0.214429	0.0845355	0.533903
CASE225	3	2	2	-0.320037	-0.300084	0.953707
CASE226	3	2	2	-0.253463	-0.123479	0.867602
CASE227	3	3	1	0.138324	1.0264	-0.233614
CASE228	1	1	3	-1.12394	-2.54457	3.33909
CASE229	3	3	1	0.200088	1.19359	-0.3783
CASE230	3	3	1	0.0897158	0.86813	-0.24508
CASE231	3	2	2	-0.300346	-0.225769	0.87923
CASE232	3	3	2	-0.172807	0.121761	0.532324
CASE233	3	2	2	-0.418966	-0.637236	1.27857
CASE234	1	1	3	-1.44156	-3.45952	3.93539
CASE235	3	2	2	-0.341444	-0.367942	1.10578
CASE236	3	3	1	0.0753208	0.853165	-0.25384
CASE237	1	1	3	-1.01411	-2.19999	2.89234
CASE238	3	2	2	-0.342556	-0.36836	1.03526
CASE239	3	3	1	-0.138403	0.212617	0.453489
CASE240	3	3	1	0.0904902	0.874691	-0.239552
CASE241	3	2	2	-0.256926	-0.0824447	0.719633
CASE242	3	3	1	-0.00129953	0.632421	-0.0938406
CASE243	3	3	1	0.0997743	0.903537	-0.236553
CASE244	3	3	1	-0.147067	0.241468	0.421031
CASE245	3	3	1	0.110793	0.926178	-0.299008
CASE246	3	3	1	0.111248	0.934641	-0.25521
CASE247	3	3	1	0.174151	1.14812	-0.373895
CASE248	3	3	1	0.0942668	0.910933	-0.273938
CASE249	3	3	1	0.0581442	0.806981	-0.173739
CASE250	3	3	1	0.0746046	0.828007	-0.196988
CASE251	3	3	2	-0.155166	0.2003	0.558564
CASE252	3	3	1	0.0218192	0.655841	-0.0457144
CASE253	3	3	1	0.087995	0.885465	-0.272638
CASE254	3	2	2	-0.356706	-0.435448	1.04331
CASE255	3	3	1	0.0726485	0.791705	-0.301309
CASE256	3	3	1	0.0996839	0.902025	-0.1804
CASE257	3	2	2	-0.26091	-0.152396	0.728851
CASE258	1	2	3	-0.750308	-1.47747	2.205
CASE259	1	1	3	-0.876339	-2.00355	2.73249
CASE260	3	2	2	-0.317292	-0.362455	1.0177
CASE261	3	3	1	0.0711021	0.801292	-0.118423
CASE262	3	3	1	0.0927379	0.871294	-0.260763
CASE263	3	3	1	0.0511912	0.724901	-0.064308
CASE264	3	2	2	-0.308143	-0.286437	0.945165
CASE265	3	3	1	0.0627266	0.802575	-0.0823664
CASE266	3	3	1	0.095552	0.892251	-0.219446
CASE267	3	2	2	-0.272365	-0.0394861	0.677145
CASE268	3	3	1	-0.171876	0.134203	0.491829
CASE269	3	2	2	-0.406505	-0.593967	1.27844
CASE270	3	2	2	-0.264095	-0.118367	0.809081
CASE271	3	3	1	0.0641545	0.804688	-0.179919
CASE272	3	3	1	0.0776192	0.84587	-0.259026
CASE273	3	3	1	0.0902357	0.821078	-0.20727
CASE274	3	3	1	0.0716258	0.804483	-0.132728
CASE275	3	2	2	-0.254669	-0.0994784	0.805513
CASE276	3	3	1	0.0346878	0.650935	0.0441294
CASE277	3	3	1	0.0959278	0.881728	-0.317082
CASE278	3	3	1	0.0652961	0.780515	-0.135885
CASE279	3	3	1	0.0733976	0.811138	-0.110925
CASE280	1	1	3	-0.931493	-1.99401	2.60736
CASE281	3	3	1	-0.0832565	0.453338	0.280621
CASE282	3	3	2	-0.243977	0.105672	0.605175
CASE283	1	1	3	-0.908481	-2.08608	2.86733
CASE284	3	3	2	-0.141269	0.179957	0.507364
CASE285	3	3	1	0.00108729	0.586672	0.0618747
CASE286	3	3	1	0.0560834	0.77138	-0.124569
CASE287	3	3	1	-0.162848	0.190167	0.360906
CASE288	3	2	2	-0.288579	-0.240017	0.874003
CASE289	3	2	2	-0.385135	-0.550411	1.15309
CASE290	3	3	1	-0.000212395	0.547076	0.124361
CASE291	3	2	2	-0.582176	-1.05081	1.78292
CASE292	3	2	2	-0.464498	-0.757054	1.33539
CASE293	3	2	2	-0.326181	-0.333083	0.944171
CASE294	3	3	1	0.0811273	0.849143	-0.213161
CASE295	3	3	2	-0.192283	0.0311045	0.649044
CASE296	3	3	1	0.0735448	0.845195	-0.189231
CASE297	3	3	1	-0.0757843	0.385107	0.265805
CASE298	3	3	1	0.0741103	0.833497	-0.244709
CASE299	1	1	3	-1.31294	-3.15739	3.61353
CASE300	3	3	1	-0.124893	0.250558	0.394777
CASE301	3	3	2	-0.204883	0.033969	0.776724
CASE302	3	3	1	0.0696584	0.794204	-0.0592249
CASE303	3	2	2	-0.23196	-0.0229652	0.726069
CASE304	3	2	2	-0.315164	-0.30514	1.1127
CASE305	3	2	2	-0.31536	-0.324231	0.824854
CASE306	3	3	1	0.0925961	0.896566	-0.227778
CASE307	3	3	1	0.0769931	0.81343	-0.173449
CASE308	1	1	3	-0.846799	-1.83454	2.58745
CASE309	3	3	2	-0.201804	0.0686472	0.682971
CASE310	3	3	1	0.0413165	0.706652	-0.0719123
CASE311	3	3	1	0.0982949	0.921051	-0.227699
CASE312	3	2	2	-0.313563	-0.273442	0.963254
CASE313	3	2	2	-0.406097	-0.588598	1.23762
CASE314	3	2	2	-0.343778	-0.41294	0.999241
CASE315	3	2	2	-0.34542	-0.406688	1.07576
CASE316	3	3	1	0.0556058	0.783231	-0.134216
CASE317	3	2	2	-0.243504	-0.0951603	0.888815
CASE318	3	3	2	-0.189792	0.0365375	0.622411
CASE319	3	2	2	-0.25334	-0.135412	0.870496
CASE320	3	3	1	0.109145	0.898386	-0.228668
CASE321	3	3	1	0.0546916	0.772027	-0.0865437
CASE322	1	1	3	-0.843512	-1.79024	2.44895
CASE323	3	3	1	0.107201	0.945398	-0.267322
CASE324	3	3	1	0.00620603	0.612115	0.00916448
CASE325	3	3	1	0.058861	0.804088	-0.216671
CASE326	3	3	1	-0.0339487	0.586797	0.0759097
CASE327	3	3	2	-0.231367	0.0123426	0.670139
CASE328	3	2	2	-0.412438	-0.594509	1.30786
CASE329	3	3	1	0.048606	0.740612	-0.0512941
CASE330	3	2	2	-0.349198	-0.400904	1.17079
CASE331	3	2	2	-0.267675	-0.118078	0.794405
CASE332	3	2	2	-0.376794	-0.459287	1.09832
CASE333	3	2	2	-0.397969	-0.567709	1.21936
CASE334	3	2	2	-0.50568	-0.93261	1.43329
CASE335	3	2	2	-0.496104	-0.850441	1.39238
CASE336	3	3	1	-0.065535	0.516917	0.118955
CASE337	3	3	1	0.00702845	0.699179	-0.018912
CASE338	3	2	2	-0.352115	-0.414715	1.056
CASE339	3	3	1	0.112894	0.946114	-0.307722
CASE340	3	2	2	-0.346733	-0.396876	1.04858
CASE341	1	1	3	-1.05673	-2.38233	3.09516
CASE342	3	2	2	-0.392961	-0.531484	1.19241
CASE343	3	3	1	-0.0874377	0.384522	0.267489
CASE344	3	3	1	0.0659908	0.785319	-0.150066
CASE345	3	3	1	0.0887652	0.853821	-0.193856
CASE346	3	3	1	0.0883586	0.881783	-0.190279
CASE347	3	3	1	0.0283107	0.695971	-0.0632871
CASE348	3	3	1	0.132931	1.00871	-0.27618
CASE349	3	3	1	0.061612	0.809305	-0.181698
CASE350	3	2	2	-0.384955	-0.512161	1.09036
CASE351	3	2	2	-0.299243	-0.241364	0.926446
CASE352	3	3	1	0.0647355	0.806257	-0.148926
CASE353	3	3	1	0.0642202	0.811374	-0.144177
CASE354	1	1	3	-1.15672	-2.61494	3.31553
CASE355	3	3	1	0.0881208	0.886843	-0.260595
CASE356	3	2	2	-0.407339	-0.532851	1.13471
CASE357	3	2	2	-0.259502	-0.123527	0.821837
CASE358	1	1	3	-0.888466	-1.83616	2.55846
CASE359	3	3	1	0.0452221	0.731813	-0.16294
CASE360	3	2	2	-0.319952	-0.305454	0.913315
CASE361	3	3	1	0.0797903	0.871589	-0.208355
CASE362	3	3	1	0.109033	0.942646	-0.284572
CASE363	3	2	2	-0.308931	-0.251401	0.956568
CASE364	3	2	2	-0.428177	-0.634155	1.16744
CASE365	3	3	1	0.0687928	0.817826	-0.12989
CASE366	3	2	2	-0.250523	-0.06924	0.719029
CASE367	1	1	3	-0.856144	-1.78638	2.30778
CASE368	3	3	2	-0.233926	0.0238608	0.720129
CASE369	3	2	2	-0.393064	-0.53982	1.14575
CASE370	3	3	1	0.00279212	0.662825	0.0981875
CASE371	3	2	2	-0.333502	-0.343336	0.951701
CON1	3	2	2	-0.22542	-0.03493	0.670809
CON2	3	2	2	-0.39984	-0.575246	1.18218
CON3	3	3	1	0.040895	0.716288	-0.056737
CON4	3	3	1	0.0705364	0.799096	-0.199796
CON5	3	2	2	-0.33711	-0.38344	1.12914
CON6	3	3	1	0.0321384	0.691369	-0.00920673
CON7	3	3	1	0.0614097	0.797043	-0.128436
CON8	1	1	3	-1.33474	-3.14959	3.85074
CON9	3	3	1	0.0861985	0.855024	-0.194675
CON10	3	2	2	-0.265664	-0.153799	0.902845
CON11	3	2	2	-0.346845	-0.373085	1.07471
CON12	3	3	1	0.0229284	0.657086	0.0234962
CON13	3	3	1	-0.113614	0.311772	0.440022
CON14	3	3	1	0.0887853	0.857232	-0.148786
CON15	3	3	1	0.0687643	0.875351	-0.312986
CON16	3	3	1	0.0721457	0.824285	-0.140208
CON17	3	2	2	-0.278052	-0.183401	0.889719
CON18	3	3	1	0.0673669	0.794118	-0.098911
CON19	3	2	2	-0.328233	-0.321719	0.918913
CON20	3	2	2	-0.377255	-0.475844	1.21911
CON21	3	3	1	0.134276	1.02505	-0.356104
CON22	3	2	2	-0.458959	-0.759377	1.33702
CON23	3	3	1	0.0700978	0.819467	-0.160515
CON24	3	2	2	-0.373679	-0.466274	1.20743
CON25	3	3	1	0.0205286	0.634661	-0.012046
CON26	3	3	1	0.0238901	0.669474	-0.0528912
CON27	3	3	1	0.0366541	0.725908	-0.000948655
CON28	3	2	2	-0.363496	-0.486761	1.07793
CON29	3	3	2	-0.202748	0.0420609	0.580601
CON30	1	1	3	-1.71964	-4.39276	4.80915
CON31	1	1	3	-0.977799	-2.08355	2.74016
CON32	3	3	2	-0.198779	0.0717445	0.588618
CON33	3	2	2	-0.32889	-0.464303	1.00023
CON34	3	3	1	0.0841273	0.825573	-0.208634
CON35	3	3	1	0.0911132	0.881606	-0.320651
CON36	3	2	2	-0.614877	-0.941557	1.60682
CON37	3	3	1	0.049304	0.735495	-0.0403744
CON38	3	3	1	0.0249946	0.658701	-0.0299853
CON39	3	3	1	0.0409791	0.653883	-0.0874325
CON40	3	2	2	-0.393265	-0.552497	1.16442
CON41	3	2	2	-0.426962	-0.68172	1.28982
CON42	3	3	1	0.0706859	0.82712	-0.115512
CON43	3	3	1	0.144512	1.03467	-0.349122
CON44	3	3	1	0.0889347	0.892964	-0.317892
CON45	3	3	1	0.0630461	0.775533	-0.187736
CON46	3	3	2	-0.196448	0.0339489	0.742686
CON47	3	3	1	0.0657521	0.788521	-0.142695
CON48	3	3	2	-0.162109	0.14125	0.587945
CON49	3	3	2	-0.195565	0.0306103	0.622604
CON50	3	2	2	-0.315853	-0.27488	0.966165
CON51	1	1	3	-1.26611	-2.95515	3.57458
CON52	3	3	2	-0.166607	0.121531	0.597857
CON53	3	3	1	-0.146469	0.201392	0.431164
CON54	3	2	2	-0.367034	-0.32797	0.997028
CON55	3	2	2	-0.315489	-0.292334	1.03341
CON56	3	3	1	0.0248979	0.639875	0.00747577
CON57	1	2	3	-0.691978	-1.30431	2.19565
CON58	3	3	1	0.0842062	0.88976	-0.240688
CON59	3	3	1	-0.00158336	0.592789	0.0783532
CON60	3	3	1	-0.104499	0.270902	0.370761
CON61	3	3	2	-0.173956	0.173095	0.532946
CON62	3	3	1	-0.149551	0.247891	0.398857
CON63	3	2	2	-0.312823	-0.381529	1.07784
CON64	3	3	1	0.0817801	0.846089	-0.225765
CON65	3	2	2	-0.386007	-0.53894	1.14018
CON66	3	3	1	0.0682557	0.8052	-0.087687
CON67	3	3	2	-0.222541	0.0247293	0.655162
CON68	3	2	2	-0.271743	-0.21167	0.867586
CON69	3	3	1	0.0405438	0.744531	-0.153707
CON70	3	2	2	-0.354639	-0.520143	1.13668
CON71	3	2	2	-0.229999	-0.0752202	0.734257
CON72	3	2	2	-0.288349	-0.244646	0.841608
CON73	3	3	1	0.113181	0.996369	-0.344455
CON74	3	3	1	-0.103859	0.31456	0.305914
CON75	3	3	1	-0.132024	0.294169	0.40259
CON76	3	3	1	-0.0167264	0.59971	0.0668391
CON77	3	2	2	-0.625271	-1.07947	1.77053
CON78	3	3	1	-0.172662	0.193859	0.418453
CON79	1	1	3	-0.863362	-1.87887	2.614
CON80	3	3	1	0.05952	0.794553	-0.0680822
CON81	3	2	2	-0.452204	-0.718763	1.37417
CON82	3	2	2	-0.313729	-0.224474	0.863327
CON83	1	1	3	-1.00147	-2.15276	2.95596
CON84	3	3	1	0.091255	0.871945	-0.174869
CON85	3	3	2	-0.196722	0.106435	0.51714
CON86	1	1	3	-0.835609	-1.80259	2.50152
CON87	3	3	1	0.03641	0.675977	-0.0124292
CON88	3	3	1	0.107074	0.909282	-0.185065
CON89	3	3	1	-0.0320233	0.48294	0.208166
CON90	3	2	2	-0.445089	-0.650439	1.26344
CON91	3	2	2	-0.517471	-0.949639	1.46931
CON92	3	3	1	0.0189468	0.653968	0.0189172
CON93	3	3	1	0.100515	0.91466	-0.266743
CON94	3	3	1	0.0244632	0.632423	-0.177426
CON95	3	2	2	-0.412934	-0.595398	1.26966
CON96	3	3	1	0.0273296	0.661606	-0.00140347
CON97	3	3	1	-0.0276008	0.532209	0.0662345
CON98	3	2	2	-0.429728	-0.636713	1.16959
CON99	3	2	2	-0.38976	-0.532005	1.15374
CON100	3	2	2	-0.344275	-0.411196	1.10757
CON101	1	1	3	-1.50369	-3.73685	4.01577
CON102	3	3	1	0.0357608	0.733801	-0.0788866
CON103	3	3	1	0.103701	0.918824	-0.0703574
CON104	3	3	1	-0.118276	0.2907	0.388955
CON105	3	2	2	-0.215166	-0.0376245	0.61547
CON106	3	3	1	0.0398628	0.683446	-0.027313
CON107	3	2	2	-0.365201	-0.451396	1.09479
CON108	3	2	2	-0.297298	-0.24287	0.889645
CON109	3	3	1	0.0457895	0.696822	-0.0590378
CON110	3	3	2	-0.149267	0.184892	0.498007
CON111	3	3	1	-0.180546	0.137175	0.473649
CON112	3	3	1	0.0782948	0.836581	-0.153761
CON113	3	2	2	-0.238221	-0.121285	0.880877
CON114	3	2	2	-0.240829	-0.067441	0.72741
CON115	1	1	3	-0.93622	-2.02042	2.65957
CON116	1	1	3	-1.01487	-2.27992	2.93669
CON117	3	2	2	-0.265259	-0.159632	0.769732
CON118	3	3	1	0.114275	0.932752	-0.269917
CON119	3	3	1	0.0333507	0.691708	0.00175934
CON120	1	1	3	-1.23916	-2.91156	3.62057
CON121	3	3	1	0.0556545	0.781871	-0.110516
CON122	3	3	1	-0.137759	0.270544	0.435835
CON123	3	3	1	0.0508421	0.730627	0.000199338
CON124	1	2	3	-0.756017	-1.50638	2.29181
CON125	3	3	1	0.0722441	0.827473	-0.139758
CON126	3	2	2	-0.219887	-0.0404996	0.713363
CON127	3	3	1	-0.0754026	0.477787	0.220225
CON128	3	3	2	-0.186793	0.104369	0.585173
CON129	3	3	1	0.05879	0.788385	-0.165826
CON130	3	3	1	0.154755	1.10179	-0.332113
CON131	3	2	2	-0.276916	-0.199218	0.825261
CON132	3	3	1	0.0479188	0.746196	-0.11689
CON133	3	2	2	-0.310872	-0.292435	0.855399
CON134	3	3	1	0.0468817	0.739244	-0.099825
CON135	1	1	3	-0.911144	-1.94826	2.7605
CON136	3	3	1	0.0948171	0.863241	-0.299462
CON137	3	2	2	-0.275424	-0.18265	0.861679
CON138	3	3	1	0.0595303	0.757117	-0.192578
CON139	3	3	1	0.0477698	0.736178	-0.110463
CON140	3	2	2	-0.583467	-0.974085	1.51488
CON141	3	3	1	0.0454973	0.725941	-0.0724609
CON142	3	2	2	-0.262685	-0.143983	0.810158
CON143	3	2	2	-0.238812	-0.0545278	0.746134
CON144	1	2	2	-0.723916	-1.31572	1.92927
CON145	3	3	1	0.0414827	0.752757	-0.108788
CON146	3	3	1	-0.108447	0.33147	0.41092
CON147	3	3	1	0.0291835	0.730348	-0.0354433
CON148	3	2	2	-0.222498	-0.0336351	0.666809
CON149	3	3	1	0.000303288	0.636514	-0.10197
CON150	3	3	1	0.0554152	0.728172	-0.130041
CON151	3	3	2	-0.18805	0.0414705	0.537505
CON152	1	1	3	-0.889791	-1.92362	2.53065
CON153	3	2	2	-0.23802	-0.082385	0.828518
CON154	3	3	1	0.0669116	0.741661	-0.26297
CON155	3	3	1	0.086034	0.882287	-0.283065
CON156	3	2	2	-0.301591	-0.309798	0.882296
CON157	3	3	1	0.047607	0.679856	-0.098829
CON158	3	3	1	0.124298	0.981067	-0.337713
CON159	3	3	1	-0.056422	0.473724	0.258719
CON160	3	2	2	-0.31358	-0.280658	0.862596
CON161	1	1	3	-1.41997	-3.46084	3.89149
CON162	3	3	1	0.0574832	0.806105	-0.146677
CON163	3	3	1	0.0385516	0.700338	-0.0857661
CON164	3	3	1	-0.0777933	0.407897	0.212592
CON165	3	2	2	-0.272601	-0.183659	0.896547
CON166	3	3	1	-0.0675986	0.391414	0.244713
CON167	3	3	2	-0.223656	0.0159062	0.649569
CON168	3	2	2	-0.339567	-0.391732	1.08842
CON169	3	2	2	-0.270593	-0.174012	0.816731
CON170	3	3	1	0.0450163	0.737956	-0.0721642
CON171	3	2	2	-0.23837	-0.0403697	0.786969
CON172	3	2	2	-0.284012	-0.237322	0.876197
CON173	3	3	1	-0.0697515	0.394122	0.41762
CON174	1	1	3	-1.00419	-2.19542	2.86102
CON175	3	3	1	0.106742	0.911535	-0.316292
CON176	3	3	1	-0.00611046	0.617119	-0.0574597
CON177	3	2	2	-0.34989	-0.414644	1.05712
CON178	3	2	2	-0.238866	-0.0762826	0.669728
CON179	3	2	2	-0.260768	-0.156276	0.839225
CON180	3	3	1	0.0675164	0.782868	-0.0707425
CON181	3	3	1	-0.100208	0.313026	0.254076
CON182	3	3	1	0.0228388	0.688056	-0.100668
CON183	1	1	3	-0.851011	-1.76886	2.51776
CON184	3	2	2	-0.289061	-0.223663	0.906853
CON185	3	3	1	0.020157	0.67655	-0.0280487
CON186	3	3	1	0.0262647	0.644573	-0.0747817
CON187	1	1	3	-0.997646	-2.35927	3.03166
CON188	3	3	1	0.0250485	0.695989	-0.0474556
CON189	3	2	2	-0.260072	-0.09314	0.729757
CON190	3	3	1	0.0128212	0.618221	0.0970651
CON191	3	2	2	-0.365224	-0.424918	1.06974
CON192	1	1	3	-1.08392	-2.49501	3.24846
CON193	3	2	2	-0.26038	-0.113435	0.674828
CON194	3	2	2	-0.219129	-0.0479952	0.672586
CON195	3	3	1	0.0164044	0.677274	-0.0455498
CON196	3	3	1	0.00555432	0.664922	-0.0304725
CON197	3	3	1	0.0653898	0.750729	-0.145
CON198	3	2	2	-0.340655	-0.372645	0.9682
CON199	3	3	1	0.0222158	0.716521	-0.0581593
CON200	1	1	3	-1.56285	-3.89151	4.41608
CON201	3	3	1	0.0378517	0.702428	-0.015127
CON202	3	3	1	-0.097313	0.359822	0.238946
CON203	3	3	1	-0.128763	0.353882	0.388733
CON204	3	2	2	-0.230377	-0.0894222	0.716458
CON205	3	3	1	-0.0902661	0.358462	0.259937
CON206	3	3	1	0.0832755	0.824098	-0.122256
CON207	3	3	1	0.058148	0.785938	-0.184075
CON208	3	3	1	-0.130024	0.26124	0.433374
CON209	3	3	1	0.102116	0.895856	-0.244302
CON210	3	3	2	-0.187991	0.0227859	0.589222
CON211	3	3	1	-0.128261	0.255277	0.389968
CON212	3	2	2	-0.56478	-1.0171	1.66987
CON213	3	3	1	0.0436396	0.681124	-0.0920913
CON214	3	3	1	-0.114725	0.29841	0.257985
CON215	3	2	2	-0.346348	-0.376761	1.06098
CON216	3	3	1	0.108494	0.927874	-0.332974
CON217	3	2	2	-0.224607	-0.0642357	0.664015
CON218	3	2	2	-0.586425	-1.11504	1.65666
CON219	3	2	2	-0.308748	-0.203956	0.706998
CON220	1	1	3	-0.921528	-2.07143	2.51513
CON221	3	3	1	0.0576306	0.79322	-0.16002
CON222	3	3	2	-0.220718	0.0306771	0.676371
CON223	1	1	3	-1.12325	-2.58197	3.26441
CON224	3	3	1	0.0603157	0.794349	-0.180253
CON225	3	2	2	-0.362227	-0.439426	1.08498
CON226	3	2	2	-0.325315	-0.332704	0.964126
CON227	3	2	2	-0.385488	-0.527517	1.14694
CON228	3	2	2	-0.315554	-0.306182	0.933846
CON229	3	3	1	-0.159003	0.155717	0.469022
CON230	1	1	3	-1.43148	-3.53069	4.29274
CON231	3	2	2	-0.261217	-0.148348	0.834772
CON232	3	2	2	-0.229087	-0.0174787	0.702721
CON233	3	3	1	0.0813672	0.859501	-0.231962
CON234	3	2	2	-0.284968	-0.352457	0.695537
CON235	3	3	1	0.061585	0.773525	-0.128075
CON236	3	3	1	-0.154538	0.193642	0.374708
CON237	3	2	2	-0.266416	-0.201204	0.751683
CON238	3	2	2	-0.33521	-0.33095	0.969155
CON239	3	3	1	0.0919212	0.868305	-0.245344
CON240	3	2	2	-0.252136	-0.0677908	0.850251
CON241	1	1	3	-1.17821	-2.70763	3.52273
CON242	3	3	1	0.129507	0.968005	-0.300042
CON243	3	2	2	-0.239109	-0.0366138	0.789547
CON244	3	3	1	0.108748	0.92099	-0.291986
CON245	3	3	2	-0.201075	0.0447661	0.631439
CON246	3	3	1	0.162717	1.10556	-0.407663
CON247	3	2	2	-0.252011	-0.0702347	0.82936
CON248	3	2	2	-0.274789	-0.165576	0.865407
CON249	3	3	1	0.16714	1.0943	-0.384126
CON250	3	3	1	0.144678	1.03655	-0.361056
CON251	3	2	2	-0.313393	-0.342016	0.986219
CON252	3	2	2	-0.310431	-0.256872	0.891824
CON253	3	2	2	-0.245373	-0.0850396	0.746224
CON254	3	3	1	0.0630093	0.813454	-0.156291
CON255	3	3	1	0.0934671	0.89504	-0.246757
CON256	3	3	1	0.0945164	0.888809	-0.304361
CON257	3	2	2	-0.330466	-0.352102	1.0055
CON258	3	3	1	0.105969	0.948754	-0.265353
CON259	1	1	3	-0.779612	-1.54409	2.21622
CON260	3	2	2	-0.277812	-0.184212	0.889329
CON261	3	3	1	0.0678784	0.783071	-0.0889439
CON262	1	1	3	-1.37843	-3.4596	4.14422
CON263	1	1	3	-0.994648	-2.31095	3.07693
CON264	1	1	3	-0.847658	-1.70795	2.42979
CON265	3	3	1	0.121398	0.961439	-0.276901
CON266	3	3	2	-0.203513	0.0435929	0.575005
CON267	3	3	1	0.0898301	0.849509	-0.218146
CON268	3	3	1	0.0910837	0.865825	-0.247291
CON269	3	2	2	-0.255423	-0.117481	0.768267
CON270	3	3	1	0.0863754	0.865277	-0.315419
CON271	3	3	1	0.0961412	0.881588	-0.23704
CON272	3	2	2	-0.455069	-0.632988	1.45964
CON273	3	3	1	0.0799039	0.884179	-0.187103
CON274	3	2	2	-0.276145	-0.188892	0.826211
CON275	3	2	2	-0.248088	-0.0670232	0.686776
CON276	3	3	1	0.044078	0.728297	-0.114931
CON277	3	3	1	0.0525545	0.774019	-0.154854
CON278	3	2	2	-0.26357	-0.109617	0.879801
CON279	3	2	2	-0.306307	-0.269497	0.814465
CON280	1	1	3	-0.762281	-1.51381	2.2713
CON281	3	2	2	-0.27609	-0.215721	0.90734
CON282	3	3	1	0.0410943	0.706968	-0.14035
CON283	3	2	2	-0.402912	-0.556987	1.17932
CON284	3	3	1	0.108992	0.918796	-0.244909
CON285	1	2	2	-0.645075	-1.20691	1.78984
CON286	3	3	1	-0.108295	0.365687	0.328373
CON287	3	3	1	0.0621495	0.788675	-0.192089
CON288	3	3	1	0.109875	0.891307	-0.215091
CON289	3	3	2	-0.208451	0.0197949	0.69515
CON290	1	2	2	-0.684445	-1.27709	1.93244
CON291	3	2	2	-0.286475	-0.198507	0.811013
CON292	3	2	2	-0.343298	-0.410506	1.16373
CON293	3	2	2	-0.274196	-0.163213	0.954851
CON294	3	3	1	0.103544	0.93721	-0.258447
CON295	3	2	2	-0.355924	-0.418858	1.13782
CON296	3	3	1	0.112338	0.920279	-0.204289
CON297	3	2	2	-0.372166	-0.418076	0.90702
CON298	3	3	1	0.0620981	0.775058	-0.0627092
CON299	3	3	2	-0.219914	0.00447609	0.623179
CON300	3	2	2	-0.224538	-0.0247201	0.741826
CON301	3	3	1	0.0721426	0.827085	-0.188577
CON302	3	3	1	0.0550606	0.706772	-0.0732254
CON303	3	3	2	-0.200689	0.0315833	0.724495
CON304	3	3	1	0.0693851	0.789219	-0.140546
CON305	3	2	2	-0.48876	-0.831661	1.57802
CON306	3	2	2	-0.26325	-0.121181	0.854133
CON307	3	3	1	0.116652	0.950594	-0.298802
CON308	3	2	2	-0.311825	-0.29945	1.02981
CON309	3	2	2	-0.321353	-0.353724	1.0631
CON310	3	3	1	0.116952	0.960601	-0.323026
CON311	3	2	2	-0.401394	-0.585165	1.25867
CON312	3	3	1	0.0607413	0.749566	-0.116303
CON313	3	3	1	0.140666	1.00403	-0.327189
CON314	3	3	2	-0.140223	0.155121	0.579266
CON315	3	3	1	0.0675693	0.857819	-0.186992
CON316	3	3	1	0.113734	0.963401	-0.318741
CON317	3	3	1	0.0327516	0.703835	-0.0403813
CON318	3	3	1	-0.0224263	0.548017	0.057272
CON319	3	3	1	0.0322223	0.595387	0.0717934
CON320	3	2	2	-0.233841	-0.0592437	0.692256
CON321	3	2	2	-0.393287	-0.530826	1.17907
CON322	3	3	1	0.0459702	0.728419	-0.100079
CON323	1	1	3	-1.10895	-2.55004	3.31237
CON324	3	3	1	0.084647	0.846588	-0.265565
CON325	3	3	2	-0.27005	0.0525374	0.609819
CON326	1	1	3	-0.835204	-1.75025	2.50844
CON327	3	3	1	0.153204	1.05888	-0.306782
CON328	3	2	2	-0.382785	-0.553495	1.1658
CON329	3	3	1	-0.0491082	0.556896	0.181884
CON330	3	2	2	-0.225682	-0.089667	0.676488
CON331	3	3	1	0.0741178	0.874312	-0.192134
CON332	3	3	1	-0.12751	0.32393	0.381138
CON333	1	1	3	-1.09949	-2.44623	3.13673
CON334	3	3	1	0.10443	0.921763	-0.378978
CON335	3	3	1	0.0497644	0.714987	-0.026252
CON336	3	3	1	-0.100895	0.338278	0.32414
CON337	3	3	1	0.072031	0.758917	-0.148409
CON338	3	2	2	-0.471336	-0.682965	1.47984
CON339	3	3	1	-0.116475	0.347097	0.368656
CON340	3	2	2	-0.25825	-0.105916	0.743111
CON341	1	1	3	-0.75644	-1.57166	2.26023
CON342	1	1	3	-0.989938	-2.23793	3.04598
CON343	3	3	1	0.109692	0.93925	-0.337243
CON344	3	3	1	0.127415	0.978187	-0.336515
CON345	3	3	1	0.0840118	0.860061	-0.235658
CON346	3	3	1	-0.172821	0.16689	0.465432
CON347	1	1	3	-1.01139	-2.22285	2.85035
CON348	3	3	1	-0.0212103	0.656252	-0.215827
CON349	3	2	2	-0.264151	-0.201636	0.852832
CON350	3	3	1	0.0953022	0.933637	-0.278262
CON351	3	2	2	-0.245263	-0.087893	0.852592
CON352	3	3	1	0.0261216	0.607823	-0.00879533
CON353	3	2	2	-0.345263	-0.432739	1.10321
CON354	3	2	2	-0.366514	-0.452942	1.04881
CON355	3	2	2	-0.326718	-0.324006	1.001
CON356	3	3	2	-0.16867	0.116213	0.586553
CON357	3	3	2	-0.186884	0.0651861	0.639216
CON358	3	3	1	0.0485761	0.733496	-0.110903
CON359	3	3	2	-0.174274	0.0805771	0.692139
CON360	3	2	2	-0.469705	-0.653022	1.26861
CON361	1	1	3	-1.18302	-2.87628	3.44871
CON362	3	3	1	0.138614	1.03943	-0.333805
CON363	3	2	2	-0.532063	-0.84929	1.58735
CON364	1	1	3	-0.921706	-2.06898	2.74631
CON365	3	3	1	0.0642786	0.797068	-0.149825
CON366	3	3	1	0.0752087	0.825958	-0.146665
CON367	1	2	3	-0.726903	-1.46127	2.26045
CON368	3	3	1	0.0345353	0.697728	-0.0390957
CON369	3	3	2	-0.156874	0.153641	0.572914
CON370	3	3	1	0.0845158	0.860841	-0.155263
CON371	3	2	2	-0.257411	-0.150036	0.837923
CON372	3	3	1	0.0612949	0.812554	-0.204915
CON373	3	3	1	0.0462531	0.732346	-0.0285816
CON374	3	2	2	-0.366421	-0.473042	1.07279
CON375	3	2	2	-0.403204	-0.610541	1.17712
CON376	3	3	1	0.0991421	0.875	-0.220355
CON377	3	2	2	-0.383094	-0.491503	1.09961
CON378	3	3	1	0.0699037	0.793793	-0.134773
CON379	1	2	3	-0.787959	-1.50151	2.22122
CON380	3	2	2	-0.413996	-0.607564	1.17086
CON381	1	1	3	-1.06194	-2.35832	2.95818
CON382	3	3	1	0.0697171	0.818511	-0.178486
CON383	3	3	1	0.0849896	0.856492	-0.152727
CON384	3	2	2	-0.24571	-0.10336	0.834738
CON385	3	2	2	-0.322646	-0.314981	0.986758
CON386	3	3	1	0.0861032	0.877986	-0.207272
CON387	3	2	2	-0.322061	-0.330122	1.09012
CON388	1	1	3	-0.780649	-1.58673	2.35316
CON389	3	3	1	0.115355	0.960539	-0.238299
CON390	1	1	3	-0.795353	-1.62844	2.32538
CON391	3	3	1	0.0905022	0.878341	-0.108248
CON392	3	2	2	-0.242278	-0.107761	0.81154
CON393	3	3	1	0.11725	0.972386	-0.316114
CON394	3	3	1	0.0735081	0.839462	-0.19886
CON395	3	3	1	-0.156841	0.150386	0.491771
CON396	3	2	2	-0.30485	-0.29344	0.95001
CON397	3	2	2	-0.29536	-0.236138	0.857298
CON398	3	2	2	-0.231478	-0.0472024	0.708025
CON399	3	2	2	-0.240691	-0.0465031	0.78297
CON400	3	3	2	-0.196822	0.068811	0.647899
CON401	3	2	2	-0.293835	-0.211466	0.860633
CON402	3	3	1	0.098527	0.938965	-0.243068
CON403	1	1	3	-0.838385	-1.77141	2.41532
CON404	3	3	1	0.062317	0.762596	-0.169869
CON405	3	2	2	-0.550899	-0.995548	1.67883
CON406	3	2	2	-0.400296	-0.568125	1.14626
CON407	3	2	2	-0.388072	-0.530033	1.09259
CON408	3	3	1	0.0689624	0.819944	-0.137876
CON409	3	2	2	-0.386068	-0.511305	1.12516
CON410	3	3	1	0.110149	0.974608	-0.332523
CON411	1	1	3	-1.5234	-3.77056	4.24665
CON412	3	2	2	-0.364037	-0.45656	1.09909
CON413	3	3	1	0.0963925	0.899781	-0.166855
CON414	1	2	2	-0.67332	-1.15418	1.91963
CON415	1	1	3	-1.43212	-3.48559	4.05755
CON416	3	3	1	-0.153394	0.247406	0.447986
CON417	3	3	1	0.106945	0.947898	-0.301562
CON418	3	3	1	0.062421	0.80274	-0.163166
CON419	3	2	2	-0.326587	-0.366911	1.01974
CON420	3	2	2	-0.486331	-0.816197	1.42258
CON421	3	2	2	-0.426892	-0.622725	1.21824
CON422	3	3	1	0.0761911	0.830484	-0.137472
CON423	3	3	1	0.0960938	0.904026	-0.219456
CON424	3	2	2	-0.486343	-0.838437	1.43262
CON425	3	3	1	0.0931104	0.907826	-0.250522
CON426	3	3	1	0.0247069	0.644273	-0.0325287
CON427	3	3	1	0.0368193	0.695967	-0.0905246
CON428	3	3	1	0.101597	0.942424	-0.304976
CON429	3	2	2	-0.334551	-0.247483	0.931907
CON430	3	3	1	0.0838316	0.870732	-0.209328
CON431	3	3	1	0.0544208	0.782204	-0.113591
CON432	3	2	2	-0.451236	-0.70803	1.44647
CON433	3	3	1	0.101492	0.931551	-0.21803
CON434	3	2	2	-0.321907	-0.307736	1.08812
CON435	3	2	2	-0.380053	-0.484519	1.14836
CON436	3	3	1	0.0680568	0.815153	-0.20735
CON437	3	3	1	0.0641147	0.811716	-0.108936
CON438	3	2	2	-0.328915	-0.313311	0.925481
CON439	3	2	2	-0.392851	-0.539288	1.04913
CON440	3	3	1	0.0406999	0.691222	-0.10767
CON441	1	1	3	-1.10911	-2.52236	3.20949
CON442	3	2	2	-0.349723	-0.41511	1.11351
CON443	3	2	2	-0.284709	-0.176625	0.783506
CON444	3	3	1	0.0888679	0.877545	-0.248665
CON445	1	2	2	-0.665946	-1.13799	1.83713
CON446	3	2	2	-0.265481	-0.160369	0.814895
CON447	3	2	2	-0.313833	-0.278314	0.941759
CON448	3	3	1	0.0467246	0.752146	-0.092154
CON449	1	1	3	-0.793786	-1.53142	2.34533
CON450	3	2	2	-0.346271	-0.337134	0.874734
CON451	3	3	1	0.0492823	0.750565	-0.0698125
CON452	3	2	2	-0.520251	-0.724494	1.36556
CON453	3	3	1	-0.0184768	0.519143	0.068849
CON454	3	3	1	0.0482741	0.745405	-0.0536239
CON455	3	2	2	-0.322441	-0.279032	0.948314
CON456	1	1	3	-1.18171	-2.74398	3.42695
CON457	1	2	3	-0.741095	-1.39489	2.07751
CON458	1	1	3	-1.18596	-2.79759	3.54584
CON459	3	3	1	0.00072323	0.522354	0.0870569
CON460	3	3	1	0.165962	1.37157	-0.64552
CON461	3	3	1	0.0775774	0.840135	-0.184579
CON462	1	1	3	-1.14334	-2.57928	3.37301
CON463	3	3	1	-0.159559	0.234771	0.369646
CON464	3	3	1	0.0479261	0.750272	-0.108052
CON465	3	2	2	-0.242115	-0.0473043	0.636054
CON466	1	1	3	-0.908272	-1.89115	2.71306
CON467	3	3	2	-0.173853	0.145583	0.545133

## Sheet: chr13_36971042_36976531
IDV	CNV genotype			Signal Intensity (log2 ratio)
	Raw	PCA	LDF	Raw	PCA	LDF
CASE1	3	3	1	0.0147197	0.671461	-0.16214
CASE2	2	2	2	-0.496856	-1.48033	2.08537
CASE3	3	3	1	0.0382842	0.730475	-0.282494
CASE4	3	3	1	-0.0423254	0.376287	0.101555
CASE5	2	2	2	-0.478467	-1.40205	1.98686
CASE6	3	3	1	0.0153756	0.661343	0.0011497
CASE7	2	2	2	-0.405831	-1.1094	1.67636
CASE8	3	3	1	0.0147112	0.680293	0.016276
CASE9	3	3	1	-0.0127855	0.534021	0.0149755
CASE10	2	2	2	-0.414426	-1.13984	1.65424
CASE11	3	3	1	0.0338515	0.734573	-0.168861
CASE12	2	2	2	-0.503441	-1.51183	2.02798
CASE13	3	3	1	-0.0243881	0.47097	0.0382588
CASE14	2	2	2	-0.518725	-1.60538	1.90077
CASE15	3	3	1	0.0131646	0.660568	0.0302328
CASE16	3	3	1	-0.0142884	0.520464	0.096875
CASE17	2	2	2	-0.319623	-0.786385	1.30889
CASE18	3	3	1	0.0152662	0.656043	-0.113615
CASE19	3	3	1	-0.00213674	0.573731	-0.0929832
CASE20	3	3	1	-0.136363	0.00956286	0.597002
CASE21	3	3	1	-0.0412064	0.374605	0.0623767
CASE22	3	3	1	-0.0266105	0.459497	0.022121
CASE23	3	3	1	-0.0447225	0.393122	0.213638
CASE24	3	3	1	-0.16901	-0.13212	0.597059
CASE25	3	3	1	-0.0335982	0.423761	0.0247543
CASE26	2	2	2	-0.449827	-1.33423	1.82519
CASE27	2	2	2	-0.400302	-1.09138	1.63556
CASE28	3	3	1	-0.147476	-0.0540683	0.606204
CASE29	2	2	2	-0.39584	-1.05493	1.6076
CASE30	3	3	1	0.0267837	0.723348	-0.0143406
CASE31	1	1	3	-1.44592	-5.45238	5.77633
CASE32	3	3	1	-0.0058284	0.558801	0.0600611
CASE33	1	1	3	-1.58759	-5.9927	6.38128
CASE34	3	3	1	-0.00280218	0.581631	0.0274909
CASE35	3	3	1	-0.0618222	0.328401	0.164275
CASE36	2	2	2	-0.502361	-1.53701	1.89779
CASE37	3	3	1	0.0658857	0.86026	-0.362324
CASE38	2	2	2	-0.319279	-0.767646	1.29069
CASE39	3	3	1	0.0214499	0.677187	-0.0993263
CASE40	3	3	1	-0.0512604	0.36721	0.291214
CASE41	3	3	1	0.00427378	0.616031	-0.0637739
CASE42	2	2	2	-0.379992	-1.00257	1.65654
CASE43	3	3	1	0.0223424	0.679522	0.00650607
CASE44	3	3	1	0.0622335	0.857082	-0.315677
CASE45	2	2	2	-0.317006	-0.729126	1.27115
CASE46	3	3	1	0.0447108	0.754661	-0.135293
CASE47	3	3	1	-0.102112	0.143248	0.431809
CASE48	2	2	2	-0.316899	-0.720357	1.43748
CASE49	3	3	1	-0.00770063	0.543465	0.115842
CASE50	3	3	1	0.00899021	0.624822	-0.0533732
CASE51	3	3	1	-0.0345878	0.409825	0.0232753
CASE52	3	3	1	-0.0357387	0.454354	0.230298
CASE53	3	3	1	0.0953407	0.984895	-0.415736
CASE54	2	2	2	-0.260965	-0.533483	0.976694
CASE55	2	2	2	-0.498975	-1.5005	2.09635
CASE56	3	3	1	-0.027724	0.467881	0.0643735
CASE57	3	3	1	0.0155602	0.637014	-0.0360208
CASE58	2	2	2	-0.463448	-1.34325	1.83719
CASE59	2	2	2	-0.258649	-0.507916	1.0713
CASE60	2	2	2	-0.39225	-1.0976	1.60829
CASE61	2	2	2	-0.488361	-1.46794	2.00722
CASE62	2	2	2	-0.324621	-0.774215	1.39323
CASE63	2	2	2	-0.340583	-0.843779	1.43939
CASE64	2	2	2	-0.339315	-0.80257	1.54525
CASE65	1	1	3	-1.04215	-3.75861	4.41554
CASE66	1	1	3	-1.01085	-3.57997	4.5828
CASE67	3	3	1	-0.00189462	0.60263	0.0656842
CASE68	3	3	1	-0.040917	0.379952	0.107621
CASE69	3	3	1	0.0255702	0.723076	0.0913761
CASE70	2	2	2	-0.380501	-1.02426	1.46938
CASE71	3	3	1	-0.00439727	0.535296	-0.0488968
CASE72	3	3	1	0.0111214	0.616068	-0.122458
CASE73	2	2	2	-0.511951	-1.59062	1.92571
CASE74	3	3	1	-0.0383058	0.411937	0.0303024
CASE75	3	3	1	-0.0516705	0.386435	0.0179589
CASE76	3	3	1	-0.0507343	0.365325	0.327589
CASE77	2	2	2	-0.483729	-1.4277	2.06313
CASE78	2	2	2	-0.400569	-1.06179	1.69374
CASE79	3	3	1	-0.107873	0.128635	0.281156
CASE80	3	3	1	0.0160369	0.645885	-0.136672
CASE81	3	3	1	0.089025	0.971925	-0.519738
CASE82	3	3	1	-0.0399964	0.372162	-0.0825489
CASE83	3	3	1	-0.0525744	0.386459	0.0408684
CASE84	3	3	1	-0.09752	0.169941	0.47436
CASE85	3	3	1	0.0252602	0.675527	-0.280187
CASE86	3	3	1	0.0170745	0.675405	0.0267142
CASE87	3	3	1	0.0531924	0.825408	-0.281943
CASE88	3	3	1	0.0503951	0.800965	-0.243819
CASE89	3	3	1	-0.0318028	0.421199	-0.118445
CASE90	3	3	1	-0.0831152	0.20443	0.354447
CASE91	3	3	1	-0.0612545	0.387107	0.351909
CASE92	3	3	1	0.0102384	0.657869	-0.0484238
CASE93	3	3	1	0.0136081	0.668014	-0.0630136
CASE94	3	3	1	0.0694384	0.920526	-0.291936
CASE95	3	3	1	0.0966936	1.00067	-0.554259
CASE96	3	3	1	-0.0213883	0.499027	-0.0647006
CASE97	3	3	1	-0.0403384	0.407638	0.151575
CASE98	3	3	1	0.00795041	0.606385	-0.100458
CASE99	2	2	2	-0.256335	-0.493156	1.23491
CASE100	3	3	1	-0.00798689	0.567668	0.306699
CASE101	3	3	1	0.0116599	0.623207	-0.145686
CASE102	2	2	2	-0.365361	-0.918621	1.4668
CASE103	3	3	1	0.0153724	0.661565	-0.0209869
CASE104	3	3	1	-0.0212177	0.511316	0.129863
CASE105	2	2	2	-0.353758	-0.864832	1.57489
CASE106	3	3	1	-0.00598835	0.564283	0.0106584
CASE107	3	3	1	0.0536596	0.811292	-0.192483
CASE108	2	2	2	-0.475672	-1.44675	1.98688
CASE109	2	2	2	-0.467657	-1.36269	1.9368
CASE110	3	3	1	0.0335253	0.735721	-0.123233
CASE111	3	3	1	-0.00923126	0.552149	0.122849
CASE112	2	2	2	-0.527108	-1.67137	1.97494
CASE113	3	3	1	0.00761096	0.609687	-0.160719
CASE114	3	3	1	0.0282549	0.691242	-0.0752806
CASE115	2	2	2	-0.474275	-1.42937	1.86057
CASE116	3	3	1	0.0150785	0.654977	-0.016287
CASE117	3	3	1	-0.0230884	0.476108	0.0672616
CASE118	3	3	1	0.125615	0.987686	-0.53682
CASE119	3	3	1	0.0215403	0.698718	-0.0338231
CASE120	2	2	2	-0.541765	-1.66519	2.176
CASE121	2	2	2	-0.470637	-1.43983	1.77247
CASE122	3	3	1	0.00518455	0.606101	-0.0846536
CASE123	1	1	3	-1.03094	-3.64272	4.623
CASE124	3	3	1	-0.0693848	0.295052	0.31524
CASE125	2	2	2	-0.362268	-0.910683	1.45008
CASE126	3	3	1	-0.0533851	0.348908	0.123134
CASE127	3	3	1	-0.0419568	0.39586	0.167734
CASE128	3	3	1	-0.00808164	0.539621	-0.0351676
CASE129	3	3	1	-0.107155	0.129121	0.422028
CASE130	3	3	1	-0.0557914	0.336928	0.0120573
CASE131	3	3	1	0.00517649	0.604577	-0.0268097
CASE132	3	3	1	0.00508522	0.599409	-0.169666
CASE133	2	2	2	-0.29655	-0.563942	1.47494
CASE134	3	3	1	-0.0145036	0.543195	0.0293756
CASE135	3	3	1	-0.0224959	0.508329	0.0444991
CASE136	3	3	1	-0.0149146	0.529618	0.148784
CASE137	3	3	1	0.00888545	0.629484	-0.125899
CASE138	3	3	1	0.0146919	0.643988	-0.166667
CASE139	2	2	2	-0.36995	-0.931066	1.71838
CASE140	2	2	2	-0.452861	-1.31694	1.84402
CASE141	3	3	1	-8.55e-06	0.563917	-0.105481
CASE142	3	3	1	-0.0636404	0.296235	0.131067
CASE143	2	2	2	-0.427991	-1.22541	1.65698
CASE144	3	3	1	0.047794	0.795567	-0.122082
CASE145	3	3	1	-0.0533722	0.338823	0.205993
CASE146	3	3	1	0.0237587	0.686261	-0.166689
CASE147	3	3	1	0.00751066	0.589668	-0.00749415
CASE148	3	3	1	0.0486892	0.79744	-0.123559
CASE149	3	3	1	-0.0428468	0.408639	0.0721817
CASE150	2	2	2	-0.407249	-1.12221	1.73274
CASE151	3	3	1	-0.0566103	0.314103	0.0158966
CASE152	3	3	1	-0.0784196	0.221526	0.249791
CASE153	3	3	1	-0.0195009	0.488128	0.0211543
CASE154	2	2	2	-0.313793	-0.764837	1.19041
CASE155	3	3	1	0.0378972	0.73669	-0.191577
CASE156	2	2	2	-0.268435	-0.542108	1.14456
CASE157	1	1	3	-1.07525	-3.85778	4.7848
CASE158	3	3	1	0.0490366	0.777462	-0.29447
CASE159	3	3	1	-0.0388738	0.426659	0.093011
CASE160	2	2	2	-0.302059	-0.681382	1.26176
CASE161	3	3	1	-0.0695732	0.23285	0.0455653
CASE162	3	3	1	-0.0307984	0.431941	0.028818
CASE163	3	3	1	-0.0015777	0.583243	-0.0343436
CASE164	2	2	2	-0.414342	-1.18224	1.71918
CASE165	2	2	2	-0.411191	-1.12128	1.73284
CASE166	2	2	2	-0.414036	-1.1444	1.69354
CASE167	2	2	2	-0.395454	-1.05315	1.59034
CASE168	2	2	2	-0.394702	-1.09316	1.47276
CASE169	3	3	1	-0.00687179	0.572554	0.115146
CASE170	2	2	2	-0.375454	-0.988665	1.42635
CASE171	2	2	2	-0.402079	-1.10157	1.60413
CASE172	3	3	1	-0.0288956	0.455146	0.129907
CASE173	2	2	2	-0.346319	-0.883233	1.34274
CASE174	3	3	1	-0.100213	0.159914	0.304489
CASE175	3	3	1	0.0503892	0.817168	-0.332649
CASE176	3	3	1	0.037789	0.749363	-0.236703
CASE177	3	3	1	-0.00904246	0.557235	0.0481657
CASE178	3	3	1	-0.00870585	0.556213	-0.0289553
CASE179	3	3	2	-0.216059	-0.276957	0.934036
CASE180	3	3	1	-0.0422593	0.458711	0.272743
CASE181	2	2	2	-0.322528	-0.769345	1.22618
CASE182	3	3	1	-0.131628	-0.0216857	0.148185
CASE183	3	3	1	0.0568224	0.821153	-0.27856
CASE184	2	2	2	-0.369573	-0.948637	1.46056
CASE185	3	3	1	-0.052644	0.367342	0.140054
CASE186	3	3	1	0.00636587	0.624694	-0.072345
CASE187	3	3	1	0.0965822	1.01277	-0.384047
CASE188	3	3	1	0.0160704	0.652844	-0.202538
CASE189	3	3	1	0.0226174	0.717758	-0.123286
CASE190	3	3	1	0.0106645	0.654493	-0.0790419
CASE191	2	2	2	-0.29854	-0.638064	1.13981
CASE192	3	3	1	-0.00274396	0.585727	0.0144582
CASE193	3	3	1	0.0540707	0.887242	-0.183634
CASE194	2	2	2	-0.385167	-0.981149	1.58367
CASE195	3	3	1	0.0306527	0.721408	-0.141871
CASE196	3	3	1	-0.0105179	0.556471	0.184753
CASE197	2	2	2	-0.460891	-1.33595	1.89117
CASE198	3	3	1	-0.17891	-0.130324	0.748781
CASE199	2	2	2	-0.346505	-0.835545	1.52338
CASE200	3	3	1	-0.0531905	0.357095	0.216184
CASE201	3	3	1	-0.0279328	0.468585	0.0131907
CASE202	2	2	2	-0.45125	-1.31521	1.87557
CASE203	3	3	1	-0.0768823	0.303323	0.496232
CASE204	2	2	2	-0.311451	-0.706743	1.25543
CASE205	3	3	2	-0.204782	-0.221996	0.957929
CASE206	3	3	1	0.0331719	0.724822	-0.0860267
CASE207	2	2	2	-0.372989	-0.979013	1.57333
CASE208	3	3	1	0.0547106	0.830162	-0.292383
CASE209	2	2	2	-0.324124	-0.785153	1.31612
CASE210	3	3	1	-0.0417497	0.402911	0.0557202
CASE211	3	3	1	-0.0227615	0.50814	0.19062
CASE212	3	3	1	0.0141847	0.642671	-0.152853
CASE213	3	3	1	-0.0556189	0.34297	0.149504
CASE214	3	3	1	-0.0308213	0.468546	0.0481305
CASE215	3	3	1	0.00249109	0.614261	-0.0019077
CASE216	3	3	1	-0.00255698	0.573535	-0.0450108
CASE217	2	2	2	-0.455274	-1.35227	1.87497
CASE218	3	3	1	-0.089803	0.221093	0.41621
CASE219	2	2	2	-0.376479	-0.987237	1.67172
CASE220	2	2	2	-0.392986	-1.05779	1.57907
CASE221	2	2	2	-0.467105	-1.39267	1.93566
CASE222	2	2	2	-0.506077	-1.57024	1.99684
CASE223	3	3	1	-0.13274	0.00238009	0.441292
CASE224	3	3	1	-0.00240371	0.613778	0.105715
CASE225	3	3	1	0.0464533	0.759559	-0.234274
CASE226	3	3	1	0.0388117	0.723255	-0.191436
CASE227	3	3	1	0.0874312	0.941469	-0.315858
CASE228	3	3	1	0.0823567	0.927297	-0.301956
CASE229	3	3	1	0.102402	1.01519	-0.289243
CASE230	3	3	1	-0.0826632	0.22634	0.303278
CASE231	2	2	2	-0.376539	-1.01653	1.55505
CASE232	3	3	1	0.0278465	0.712977	-0.182354
CASE233	2	2	2	-0.453864	-1.31728	1.93506
CASE234	2	2	2	-0.47399	-1.42364	1.87235
CASE235	2	2	2	-0.475624	-1.45016	1.888
CASE236	2	2	2	-0.530329	-1.68526	2.0255
CASE237	3	3	1	0.0272545	0.723367	-0.138863
CASE238	2	2	2	-0.454273	-1.34703	1.72301
CASE239	2	2	2	-0.338484	-0.885979	1.4559
CASE240	3	3	1	-0.029549	0.445891	0.0394459
CASE241	3	3	1	0.0712976	0.878145	-0.234485
CASE242	3	3	1	0.00441785	0.622826	0.092851
CASE243	3	3	1	0.0315916	0.740283	-0.0773102
CASE244	3	3	1	0.00704246	0.645137	-0.0585015
CASE245	2	2	2	-0.308265	-0.681764	1.28378
CASE246	2	2	2	-0.309013	-0.676364	1.34352
CASE247	2	2	2	-0.381194	-1.0363	1.54221
CASE248	3	3	1	0.054092	0.823725	-0.226023
CASE249	3	3	1	-0.0131707	0.511414	-0.0320856
CASE250	3	3	1	-0.0325971	0.479799	0.224409
CASE251	3	3	1	-0.0273443	0.465371	0.014158
CASE252	3	3	2	-0.203197	-0.163701	0.932492
CASE253	3	3	1	0.0112843	0.599234	-0.110598
CASE254	3	3	1	-0.0152194	0.500316	0.00962699
CASE255	3	3	1	-0.0107787	0.545259	-0.158401
CASE256	2	2	2	-0.373341	-0.985813	1.52549
CASE257	3	3	1	-0.000205297	0.605753	0.0253122
CASE258	3	3	1	-0.0341302	0.453166	0.0931133
CASE259	2	2	2	-0.310369	-0.676733	1.2713
CASE260	3	3	1	-0.0160085	0.524833	-0.00496695
CASE261	2	2	2	-0.52728	-1.64591	2.12484
CASE262	2	2	2	-0.495411	-1.49608	1.94703
CASE263	3	3	1	0.0345279	0.726548	-0.232471
CASE264	1	1	3	-1.30418	-4.91044	5.29176
CASE265	2	2	2	-0.512134	-1.58471	2.01033
CASE266	3	3	1	0.0417818	0.784015	-0.208923
CASE267	3	3	1	0.00043005	0.604802	0.226462
CASE268	2	2	2	-0.270721	-0.544419	1.2367
CASE269	3	3	1	0.0964973	1.01545	-0.238422
CASE270	3	3	1	-0.00658703	0.548423	0.0237325
CASE271	1	1	3	-1.62596	-6.21927	6.60385
CASE272	3	3	1	0.00395451	0.589266	-0.100009
CASE273	2	2	2	-0.64273	-2.13715	2.91582
CASE274	3	3	1	0.0303708	0.715643	-0.227955
CASE275	3	3	1	-0.0255699	0.459402	-0.0856601
CASE276	3	3	1	-0.0834851	0.252608	0.264939
CASE277	3	3	1	0.0093296	0.670932	-0.0481297
CASE278	3	3	1	-0.0204283	0.53158	-0.108725
CASE279	2	2	2	-0.240004	-0.390635	1.12735
CASE280	2	2	2	-0.431094	-1.17094	1.87224
CASE281	3	3	1	-0.0283991	0.506055	0.178562
CASE282	3	3	1	-0.0978743	0.17797	0.541531
CASE283	3	3	1	-0.0763968	0.252216	0.216368
CASE284	3	3	1	-0.178373	-0.195884	0.730733
CASE285	2	2	2	-0.4216	-1.13961	1.75843
CASE286	3	3	1	0.00596786	0.63903	-0.046788
CASE287	3	3	1	0.0153429	0.670637	-0.0945522
CASE288	3	3	1	0.0478538	0.803745	-0.185664
CASE289	2	2	2	-0.482672	-1.43631	1.94989
CASE290	3	3	1	-0.171666	-0.0975746	0.662932
CASE291	3	3	1	-0.202493	-0.318475	0.629266
CASE292	2	2	2	-0.508635	-1.54544	2.03446
CASE293	3	3	1	-0.0591144	0.350695	0.160507
CASE294	3	3	1	0.0623858	0.859105	-0.347886
CASE295	3	3	1	-0.0326041	0.467857	0.117833
CASE296	2	2	2	-0.513551	-1.58345	1.94832
CASE297	3	3	1	0.0415567	0.75637	-0.213869
CASE298	3	3	1	-0.0170086	0.512389	-0.000197857
CASE299	3	3	1	-0.0225242	0.485267	-0.0354851
CASE300	3	3	1	0.0151338	0.668947	-0.118804
CASE301	2	2	2	-0.422112	-1.16287	1.78048
CASE302	3	3	1	0.0362805	0.74112	-0.0406859
CASE303	2	2	2	-0.412253	-1.13703	1.65091
CASE304	3	3	1	-0.00025376	0.565052	-0.104103
CASE305	3	3	1	-0.0335563	0.441917	0.0222527
CASE306	3	3	1	-0.013052	0.513604	-0.0825406
CASE307	2	2	2	-0.459887	-1.35571	1.76421
CASE308	3	3	1	-0.0150746	0.518916	0.0378699
CASE309	2	2	2	-0.322193	-0.770749	1.30413
CASE310	2	2	2	-0.492085	-1.50658	1.86297
CASE311	3	3	1	0.0138381	0.639623	-0.142
CASE312	3	3	1	-0.027373	0.47565	0.0474569
CASE313	2	2	2	-0.54107	-1.69416	2.17017
CASE314	3	3	1	-0.0280603	0.507145	0.213653
CASE315	2	2	2	-0.479141	-1.41565	1.84397
CASE316	2	2	2	-0.447949	-1.25774	1.83687
CASE317	3	3	1	-0.0639547	0.289726	0.23413
CASE318	2	2	2	-0.361037	-0.890239	1.50534
CASE319	2	2	2	-0.331654	-0.761519	1.46475
CASE320	3	3	1	-0.0770337	0.263474	0.253698
CASE321	2	2	2	-0.330082	-0.794728	1.20217
CASE322	2	2	2	-0.367779	-0.902428	1.70133
CASE323	3	3	1	-0.0893762	0.242652	0.309467
CASE324	3	3	1	-0.0419307	0.404862	0.145848
CASE325	3	3	1	0.0275955	0.727629	-0.0716175
CASE326	3	3	1	-0.0320178	0.471198	0.148127
CASE327	3	3	1	0.000934033	0.592085	-0.0501884
CASE328	3	3	1	-0.048653	0.357859	0.139927
CASE329	2	2	2	-0.524242	-1.62257	2.11163
CASE330	3	3	1	-0.0163399	0.513548	0.113726
CASE331	3	3	1	-0.00710315	0.570655	0.0892623
CASE332	3	3	1	-0.0448909	0.379651	0.169762
CASE333	3	3	1	-0.039616	0.417655	0.180396
CASE334	3	3	1	0.0184028	0.688435	-0.0568559
CASE335	3	3	1	-0.0255589	0.465537	0.0486351
CASE336	3	3	1	-0.0750334	0.295016	0.502803
CASE337	2	2	2	-0.302751	-0.654571	1.39388
CASE338	3	3	1	0.0272021	0.720197	-0.111366
CASE339	3	3	1	-0.0175164	0.525098	0.0783817
CASE340	3	3	1	0.14391	1.23214	-0.546155
CASE341	3	3	1	0.018731	0.670828	-0.05452
CASE342	3	3	1	0.0345439	0.73552	-0.106744
CASE343	3	3	1	-0.033857	0.477263	0.134207
CASE344	3	3	1	-0.0238703	0.473897	0.00876959
CASE345	2	2	2	-0.425694	-1.18176	1.74896
CASE346	3	3	1	-0.00206476	0.589813	-0.0318952
CASE347	3	3	1	-0.0279502	0.471067	0.0752903
CASE348	3	3	1	0.0469876	0.776789	-0.141062
CASE349	2	2	2	-0.398198	-1.09138	1.54556
CASE350	2	2	2	-0.430326	-1.21604	1.71569
CASE351	3	3	1	-0.019404	0.499072	0.0676508
CASE352	3	3	1	0.027223	0.709277	-0.0425587
CASE353	3	3	1	0.0495079	0.820738	-0.2006
CASE354	3	3	1	0.00794131	0.626777	-0.0218529
CASE355	3	3	1	-0.0273348	0.464922	0.0485041
CASE356	3	3	1	-0.029268	0.448205	0.177629
CASE357	3	3	1	0.029096	0.709116	-0.14127
CASE358	3	3	1	-0.0136164	0.538682	0.0653433
CASE359	2	2	2	-0.528864	-1.64083	2.11627
CASE360	3	3	1	0.0565614	0.858052	-0.145754
CASE361	3	3	1	0.0221209	0.669101	-0.0276142
CASE362	2	2	2	-0.444727	-1.26975	1.91655
CASE363	3	3	1	-0.0294483	0.44479	0.0500442
CASE364	2	2	2	-0.547052	-1.76216	2.13642
CASE365	3	3	1	0.0129596	0.618342	-0.107141
CASE366	1	1	3	-1.03733	-3.60602	4.66662
CASE367	3	3	1	-0.0380342	0.407112	0.157195
CASE368	3	3	1	0.0543955	0.841043	-0.0544913
CASE369	3	3	1	-0.0139817	0.522784	-0.0104702
CASE370	3	3	1	0.0380084	0.734351	-0.174176
CASE371	2	2	2	-0.41911	-1.16019	1.62935
CON1	3	3	1	-0.0225724	0.485512	0.0846972
CON2	3	3	1	0.0333171	0.727662	-0.0789379
CON3	3	3	1	0.0247669	0.703478	-0.080465
CON4	3	3	1	-0.0006728	0.639267	0.0458239
CON5	3	3	1	0.156727	1.32997	-0.0996776
CON6	3	3	1	-0.0869339	0.211466	0.367961
CON7	3	3	1	-0.0160538	0.520222	0.0539184
CON8	3	3	1	0.00905791	0.615153	-0.0500669
CON9	2	2	2	-0.437072	-1.24344	1.7457
CON10	3	3	1	-0.00224632	0.574396	-0.0359498
CON11	2	2	2	-0.469784	-1.38696	1.85802
CON12	2	2	2	-0.484991	-1.44472	1.89776
CON13	3	3	1	-0.0623847	0.298295	0.375939
CON14	2	2	2	-0.586402	-1.88344	2.31067
CON15	3	3	1	0.0216772	0.672405	-0.136453
CON16	2	2	2	-0.457601	-1.3331	1.69741
CON17	2	2	2	-0.373112	-0.988512	1.41881
CON18	3	3	1	0.0330457	0.729496	-0.176956
CON19	3	3	1	-0.0205022	0.516454	0.0841859
CON20	3	3	1	0.0190713	0.664006	-0.0290878
CON21	3	3	1	0.00672006	0.615963	-0.189005
CON22	3	3	1	0.0265561	0.678604	-0.171959
CON23	3	3	1	0.0330466	0.730695	-0.10988
CON24	2	2	2	-0.514261	-1.5825	2.17504
CON25	2	2	2	-0.616588	-2.0233	2.40743
CON26	3	3	1	-0.0952049	0.173039	0.402199
CON27	3	3	1	-0.0132704	0.555403	-0.059898
CON28	2	2	2	-0.490749	-1.47063	1.98848
CON29	3	3	1	-0.0394882	0.397208	0.0448702
CON30	3	3	1	-0.0304267	0.446717	0.142049
CON31	3	3	1	0.0656421	0.861833	-0.156687
CON32	3	3	1	-0.0740055	0.270695	0.290204
CON33	3	3	1	-0.107976	0.155442	0.445146
CON34	3	3	1	-0.0435519	0.351997	0.0994542
CON35	3	3	1	0.0184857	0.634757	-0.167697
CON36	2	2	2	-0.333812	-0.828186	1.32406
CON37	3	3	1	-0.00367524	0.579298	0.0834231
CON38	2	2	2	-0.477538	-1.4262	1.928
CON39	2	2	2	-0.493197	-1.44453	2.15066
CON40	3	3	1	-0.0107524	0.520208	0.062039
CON41	3	3	1	-0.00896275	0.553356	0.0208605
CON42	3	3	1	-0.00759461	0.524051	-0.0253526
CON43	3	3	1	0.0247521	0.685697	-0.0870948
CON44	3	3	1	-0.0139274	0.528393	0.0376447
CON45	3	3	1	-0.0194491	0.47858	-0.0465523
CON46	3	3	1	-0.00799222	0.562188	-0.00333891
CON47	3	3	1	0.0202242	0.685098	-0.087674
CON48	3	3	1	-0.0475622	0.425338	0.255289
CON49	3	3	1	0.0306477	0.751892	-0.0692362
CON50	3	3	1	0.056136	0.827101	-0.189848
CON51	3	3	1	0.00521734	0.569079	-0.0612184
CON52	3	3	1	-0.035215	0.448484	0.105404
CON53	3	3	1	-0.0120441	0.547635	-0.0402723
CON54	3	3	1	-0.0155625	0.498832	-0.00905876
CON55	3	3	1	-0.040591	0.412541	0.132958
CON56	2	2	2	-0.525488	-1.64199	2.0436
CON57	3	3	1	-0.0118094	0.534037	-0.0286245
CON58	2	2	2	-0.543684	-1.68289	2.15584
CON59	3	3	1	-0.0507864	0.388818	0.147023
CON60	3	3	1	-0.0173742	0.514059	-0.0502966
CON61	3	3	1	0.0508122	0.812725	-0.10567
CON62	3	3	1	-0.0305149	0.463386	0.14012
CON63	3	3	1	0.00267814	0.631286	0.112759
CON64	2	2	2	-0.440594	-1.24154	1.7891
CON65	2	2	2	-0.479044	-1.44	1.84378
CON66	3	3	1	-0.0681029	0.283045	0.198542
CON67	3	3	1	-0.0272861	0.46167	0.050341
CON68	2	2	2	-0.44266	-1.29058	1.92316
CON69	3	3	1	0.0443561	0.848816	-0.087311
CON70	2	2	2	-0.504334	-1.48444	2.18852
CON71	2	2	2	-0.306204	-0.654823	1.48198
CON72	3	3	1	0.0249906	0.724917	0.0181998
CON73	2	2	2	-0.322495	-0.75175	1.32478
CON74	3	3	1	0.025283	0.737671	-0.128523
CON75	3	3	1	-0.0669269	0.291431	0.298842
CON76	3	3	1	-0.017302	0.506502	-0.0226392
CON77	3	3	2	-0.191877	-0.188364	0.93204
CON78	2	2	2	-0.478225	-1.43963	1.87306
CON79	2	2	2	-0.391967	-1.07652	1.51831
CON80	3	3	1	-0.0903978	0.19559	0.403998
CON81	3	3	1	-0.0813732	0.22323	0.301765
CON82	3	3	1	-0.0454975	0.395719	0.137549
CON83	2	2	2	-0.488418	-1.48566	1.95452
CON84	3	3	1	0.0113957	0.635622	-0.0466411
CON85	3	3	1	-0.0167766	0.510815	-0.0462649
CON86	3	3	1	-0.0747743	0.266484	0.221764
CON87	3	3	1	-0.0668171	0.303925	0.257624
CON88	3	3	1	-0.070036	0.232538	0.183772
CON89	3	3	1	0.00309084	0.601664	-0.00245387
CON90	3	3	1	0.0189597	0.670426	0.013352
CON91	2	2	2	-0.542386	-1.68949	2.13244
CON92	3	3	1	-0.0135271	0.52865	0.0610276
CON93	3	3	1	0.136733	1.21554	-0.178195
CON94	3	3	1	0.0568565	0.854757	-0.128711
CON95	2	2	2	-0.471741	-1.46582	1.73514
CON96	3	3	1	0.0321691	0.74371	-0.223378
CON97	3	3	1	-0.0400025	0.407399	0.129112
CON98	3	3	1	-0.0286458	0.46542	0.0936011
CON99	3	3	1	0.0114107	0.651088	0.0232752
CON100	3	3	1	-0.0270821	0.478236	0.15793
CON101	3	3	1	0.0264029	0.713762	-0.0829456
CON102	3	3	1	-0.020458	0.513067	0.177047
CON103	3	3	1	-0.117757	0.0621618	0.430066
CON104	3	3	1	0.00997722	0.61472	-0.0729636
CON105	3	3	1	0.0130724	0.648527	-0.0262106
CON106	3	3	1	-0.0373939	0.410987	0.076514
CON107	3	3	1	-0.0407226	0.400275	0.135619
CON108	3	3	1	0.0449855	0.782532	-0.180994
CON109	3	3	1	-0.0123483	0.523775	0.0878622
CON110	2	2	2	-0.357391	-0.886596	1.52139
CON111	3	3	1	-0.00794171	0.538042	-0.00838018
CON112	3	3	1	-0.0235583	0.506595	0.182549
CON113	3	3	1	0.0285499	0.736145	-0.130395
CON114	3	3	1	-0.01306	0.515993	0.0210209
CON115	2	2	2	-0.410979	-1.15313	1.64252
CON116	3	3	1	-0.0424812	0.391647	0.0833077
CON117	3	3	1	0.0254533	0.680012	-0.0560508
CON118	3	3	1	0.0376069	0.746949	-0.145752
CON119	3	3	1	-0.00864136	0.511474	-0.0804559
CON120	3	3	1	0.00733379	0.611809	-0.071007
CON121	3	3	1	0.0179384	0.633121	-0.237733
CON122	3	3	1	-0.044672	0.421904	0.334922
CON123	3	3	1	-0.00946572	0.56577	0.127864
CON124	3	3	1	-0.132804	-0.0188858	0.348463
CON125	3	3	1	-0.0563624	0.310629	0.109524
CON126	3	3	1	-0.043449	0.395611	0.163215
CON127	3	3	2	-0.191654	-0.184952	0.958108
CON128	3	3	1	-0.0375298	0.484717	0.399957
CON129	2	2	2	-0.452349	-1.35598	1.55576
CON130	3	3	1	0.0649684	0.877754	-0.215883
CON131	3	3	1	0.0182163	0.655983	-0.0847644
CON132	3	3	1	-0.137027	0.017309	0.634033
CON133	2	2	2	-0.395929	-1.10273	1.58161
CON134	3	3	1	-0.0135581	0.509378	0.0136365
CON135	3	3	1	-0.0825655	0.247572	0.389095
CON136	3	3	1	-0.0309953	0.426998	-0.0588621
CON137	3	3	1	-0.0933834	0.215038	0.395764
CON138	3	3	2	-0.21924	-0.314723	0.937708
CON139	3	3	1	0.0234545	0.694711	-0.11667
CON140	3	3	1	0.0118782	0.638114	-0.093971
CON141	3	3	1	-0.065054	0.318992	0.190445
CON142	3	3	1	0.0310222	0.705298	-0.210663
CON143	3	3	1	-0.038427	0.422433	0.150202
CON144	3	3	1	-0.0178811	0.49084	-0.0250132
CON145	3	3	1	0.0291634	0.703946	-0.0333868
CON146	3	3	1	-0.0441711	0.391289	0.0941163
CON147	2	2	2	-0.502684	-1.53712	2.091
CON148	3	3	1	-0.036525	0.44843	0.126046
CON149	3	3	1	-0.0604605	0.319851	0.268217
CON150	3	3	1	-0.0714817	0.281244	0.246067
CON151	3	3	1	-0.0248976	0.464374	0.085314
CON152	3	3	1	-0.0453341	0.4173	0.21293
CON153	3	3	1	-0.020572	0.490995	0.08825
CON154	3	3	1	-0.0310773	0.43554	0.0755948
CON155	3	3	1	0.0192092	0.71122	0.0106884
CON156	2	2	2	-0.419346	-1.12735	1.67909
CON157	3	3	1	-0.0186177	0.553649	0.124873
CON158	3	3	1	0.0073742	0.621808	-0.0122811
CON159	3	3	1	-0.00292477	0.585911	0.00770422
CON160	3	3	1	0.0138047	0.654657	-0.0517447
CON161	1	1	3	-1.57301	-5.91456	6.43077
CON162	3	3	1	0.0643491	0.872972	-0.201576
CON163	3	3	1	-0.132124	0.0383673	0.725491
CON164	3	3	1	-0.0370541	0.440222	0.190106
CON165	3	3	1	0.0463263	0.819306	-0.236736
CON166	3	3	1	0.0242845	0.68045	-0.0665463
CON167	3	3	1	0.0607997	0.881223	-0.202281
CON168	2	2	2	-0.44142	-1.30089	1.75647
CON169	3	3	1	-0.0183217	0.465536	-0.133515
CON170	2	2	2	-0.404957	-1.12784	1.64256
CON171	3	3	1	-0.00228597	0.576299	-0.0870877
CON172	3	3	1	-0.00528335	0.555873	-0.117212
CON173	2	2	2	-0.271119	-0.525214	1.23173
CON174	3	3	1	0.0280488	0.711387	-0.178996
CON175	3	3	1	0.0035831	0.58611	-0.267565
CON176	3	3	1	-0.000782078	0.574892	-0.00112817
CON177	2	2	2	-0.464177	-1.33992	1.96855
CON178	1	1	3	-1.05314	-3.75249	4.45647
CON179	2	2	2	-0.327066	-0.746707	1.2563
CON180	2	2	2	-0.410206	-1.14547	1.54882
CON181	2	2	2	-0.724162	-2.3651	2.96315
CON182	2	2	2	-0.255163	-0.449248	1.13407
CON183	2	2	2	-0.451658	-1.30503	1.87586
CON184	2	2	2	-0.38109	-1.01688	1.55781
CON185	2	2	2	-0.308384	-0.716256	1.32305
CON186	2	2	2	-0.444548	-1.25263	1.92047
CON187	3	3	1	-0.0962008	0.19316	0.31484
CON188	2	2	2	-0.509097	-1.49941	2.24631
CON189	3	3	1	-0.145913	0.0217693	0.799459
CON190	3	3	1	-0.077928	0.258598	0.178147
CON191	3	3	1	-0.0871555	0.240521	0.366374
CON192	3	3	1	-0.19134	-0.220304	0.636826
CON193	3	3	1	0.0291285	0.727809	-0.189559
CON194	3	3	1	-0.0529692	0.380515	0.0870483
CON195	3	3	1	-0.0439345	0.393554	0.086717
CON196	3	3	1	0.026771	0.71388	-0.117932
CON197	2	2	2	-0.462593	-1.30702	1.96008
CON198	2	2	2	-0.466574	-1.37438	1.88027
CON199	3	3	1	0.0212865	0.671888	-0.227181
CON200	3	3	1	-0.042632	0.383795	0.117841
CON201	3	3	1	-0.00412331	0.541116	-0.0917058
CON202	3	3	1	-0.00522388	0.576406	0.00384002
CON203	2	2	2	-0.244117	-0.394307	1.36584
CON204	2	2	2	-0.33862	-0.827151	1.36928
CON205	2	2	2	-0.365442	-0.873713	1.62912
CON206	3	3	1	0.0481481	0.830526	-0.189895
CON207	3	3	1	-0.0239644	0.476647	0.109522
CON208	1	1	3	-1.00981	-3.54527	4.40542
CON209	3	3	1	-0.0557241	0.385827	0.295805
CON210	3	3	1	0.0417855	0.773827	-0.200524
CON211	3	3	1	-0.0139973	0.53566	0.0442111
CON212	3	3	1	-0.209097	-0.275102	0.793166
CON213	3	3	1	-0.0744967	0.233641	0.307387
CON214	3	3	2	-0.21624	-0.281259	0.968442
CON215	3	3	1	-0.02391	0.492942	-0.0192378
CON216	3	3	1	0.0509465	0.854613	-0.23517
CON217	3	3	1	-0.000557846	0.552271	-0.0863548
CON218	3	3	1	-0.0245995	0.468098	-0.0201994
CON219	3	3	1	0.0781797	0.867595	-0.383737
CON220	3	3	1	-0.0164803	0.491031	0.0279174
CON221	3	3	1	-0.00557831	0.551959	0.0596344
CON222	3	3	1	-0.0287655	0.4485	0.10684
CON223	2	2	2	-0.401426	-1.11576	1.6123
CON224	3	3	1	-0.0350247	0.443001	0.175778
CON225	2	2	2	-0.46442	-1.39757	1.85045
CON226	3	3	1	0.00898725	0.634386	-0.00505973
CON227	3	3	1	0.00341849	0.584402	-0.0720005
CON228	3	3	1	0.013034	0.635191	-0.00663873
CON229	3	3	1	-0.109684	0.101375	0.376506
CON230	2	2	2	-0.504487	-1.5633	2.01117
CON231	2	2	2	-0.417368	-1.19992	1.54395
CON232	3	3	1	-0.0694392	0.286363	0.257636
CON233	3	3	1	0.00847255	0.601098	-0.193419
CON234	3	3	1	-0.0154684	0.497453	-0.00725908
CON235	3	3	1	0.0559425	0.805769	-0.297988
CON236	3	3	1	-0.0388909	0.405444	0.110729
CON237	2	2	2	-0.30905	-0.730111	1.12817
CON238	3	3	1	0.0160671	0.644371	-0.0867223
CON239	3	3	1	-0.0349135	0.445684	0.278769
CON240	2	2	2	-0.389943	-1.04077	1.70159
CON241	3	3	1	0.0977505	1.0023	-0.370477
CON242	3	3	1	0.0623792	0.833711	-0.262397
CON243	3	3	1	0.0497023	0.797742	-0.134042
CON244	3	3	1	0.0172249	0.643957	-0.027046
CON245	3	3	1	0.0439257	0.787866	-0.0318271
CON246	3	3	1	0.0828713	0.938873	-0.269377
CON247	3	3	1	0.0740064	0.898328	-0.20176
CON248	3	3	1	0.0470833	0.777676	-0.237929
CON249	3	3	1	0.105329	1.04608	-0.323965
CON250	3	3	1	0.0543525	0.795886	-0.213501
CON251	2	2	2	-0.374537	-1.00469	1.42999
CON252	3	3	1	0.0303715	0.691285	-0.167269
CON253	3	3	1	-0.00896346	0.539347	-0.0938313
CON254	3	3	1	0.0492632	0.792943	-0.2052
CON255	3	3	1	-0.0236689	0.470771	-0.00324145
CON256	3	3	1	0.0359597	0.733006	-0.198038
CON257	3	3	1	0.0245186	0.66661	-0.229596
CON258	2	2	2	-0.458138	-1.33641	1.86822
CON259	3	3	1	-0.00833297	0.492645	-0.202948
CON260	3	3	1	0.0116364	0.62324	-0.0601718
CON261	3	3	1	0.0233056	0.698983	0.0560066
CON262	3	3	1	-0.0403049	0.40916	0.0798834
CON263	3	3	1	0.0114589	0.624885	-0.0187229
CON264	3	3	1	-0.00153537	0.568592	-0.0208708
CON265	3	3	1	-0.0306878	0.466877	0.143668
CON266	3	3	1	-0.0462315	0.375249	0.183708
CON267	3	3	1	-0.00476314	0.575792	0.0115597
CON268	3	3	1	0.0185607	0.683385	-0.124477
CON269	3	3	1	0.012327	0.64227	-0.0178857
CON270	3	3	1	0.00213704	0.634848	-0.0251456
CON271	3	3	1	-0.0933173	0.236604	0.418193
CON272	3	3	1	-0.129329	0.0795234	0.483389
CON273	3	3	1	-0.0259556	0.502352	0.358794
CON274	3	3	1	0.00191891	0.569822	-0.0630784
CON275	3	3	1	-0.019693	0.474306	-0.0921716
CON276	3	3	1	-0.080026	0.238042	0.221751
CON277	2	2	2	-0.389443	-1.00622	1.56186
CON278	2	2	2	-0.395417	-1.04917	1.71279
CON279	3	3	1	-0.00625786	0.579787	-0.00885253
CON280	3	3	1	-0.0153726	0.546379	0.103197
CON281	3	3	1	0.0241128	0.678056	-0.0922758
CON282	3	3	1	0.0239696	0.683948	-0.178612
CON283	2	2	2	-0.510825	-1.58646	1.95105
CON284	3	3	1	-0.0274746	0.478056	0.157846
CON285	3	3	1	0.0209768	0.706634	-0.0941167
CON286	3	3	1	-0.038338	0.438623	0.263547
CON287	3	3	1	-0.0120299	0.525825	-0.0634925
CON288	3	3	1	0.0318272	0.733361	-0.0926976
CON289	3	3	1	-0.00061661	0.609669	0.064512
CON290	3	3	1	0.0509525	0.800776	-0.208719
CON291	2	2	2	-0.4341	-1.25348	1.65727
CON292	3	3	1	-0.0176419	0.519506	0.0780607
CON293	3	3	1	0.0164357	0.675982	-0.126261
CON294	2	2	2	-0.365752	-0.950137	1.43914
CON295	3	3	1	-0.0240639	0.498498	0.144979
CON296	2	2	2	-0.461039	-1.35555	1.80571
CON297	1	1	3	-1.31874	-4.84177	5.78848
CON298	3	3	1	0.00732984	0.612683	-0.0397497
CON299	3	3	1	0.0174381	0.698945	-0.0366954
CON300	3	3	1	0.0426054	0.755721	-0.278518
CON301	2	2	2	-0.425606	-1.21404	1.61341
CON302	3	3	1	0.0189246	0.642613	-0.173288
CON303	3	3	1	0.0582622	0.828738	-0.327187
CON304	3	3	1	0.0350187	0.728849	-0.205786
CON305	2	2	2	-0.637213	-2.05506	2.68638
CON306	2	2	2	-0.457765	-1.3643	1.85148
CON307	3	3	1	-0.0557697	0.353752	0.195122
CON308	3	3	1	0.0419413	0.754529	-0.196477
CON309	3	3	1	0.110957	0.976153	-0.355859
CON310	3	3	1	0.0290123	0.704242	-0.210845
CON311	3	3	1	0.0300802	0.708338	-0.210923
CON312	2	2	2	-0.586872	-1.91093	2.28989
CON313	3	3	1	0.0332805	0.718163	-0.27087
CON314	3	3	1	-0.021173	0.49018	0.123606
CON315	3	3	1	0.0240912	0.656621	-0.22114
CON316	3	3	1	-0.00712175	0.54558	-0.159782
CON317	2	2	2	-0.513541	-1.58094	2.03386
CON318	3	3	1	0.0942691	0.912288	-0.300284
CON319	3	3	1	-0.0443231	0.413632	0.135036
CON320	3	3	1	0.0226146	0.685816	-0.127184
CON321	2	2	2	-0.52906	-1.6786	1.97202
CON322	3	3	1	-0.0262889	0.493229	-0.0344569
CON323	3	3	1	0.0231922	0.706986	-0.11402
CON324	3	3	1	-0.0200734	0.519665	-0.0536468
CON325	3	3	1	-0.138584	-0.007544	0.701972
CON326	3	3	1	-0.0829006	0.230721	0.156496
CON327	2	2	2	-0.325101	-0.771307	1.50875
CON328	3	3	1	-0.0491907	0.384671	0.0647451
CON329	3	3	1	-0.0164581	0.543966	0.0818107
CON330	3	3	1	-0.0920259	0.198853	0.258897
CON331	3	3	1	0.00443943	0.658194	0.0121369
CON332	3	3	1	-0.19071	-0.179716	0.885283
CON333	3	3	1	-0.00814399	0.562831	0.0836536
CON334	2	2	2	-0.326594	-0.749834	1.37941
CON335	3	3	1	0.0998361	0.944429	-0.276245
CON336	2	2	2	-0.270128	-0.532195	1.17182
CON337	3	3	1	-0.158148	-0.0642433	0.614684
CON338	2	3	1	-0.237828	-0.370073	0.893528
CON339	3	3	1	-0.00930629	0.519302	-0.174512
CON340	2	2	2	-0.343339	-0.824608	1.51869
CON341	3	3	1	-0.015457	0.533349	0.0184974
CON342	3	3	1	0.013849	0.655691	-0.0394982
CON343	3	3	1	-0.00976959	0.553409	-0.00161303
CON344	3	3	1	0.0537853	0.821852	-0.281886
CON345	3	3	1	-0.123333	0.0652358	0.484713
CON346	2	2	2	-0.36812	-0.94126	1.46218
CON347	3	3	1	-0.0365291	0.510925	0.259597
CON348	3	3	1	-0.0752601	0.301428	0.347179
CON349	3	3	1	-0.108015	0.187276	0.504498
CON350	1	1	3	-0.915268	-3.19135	4.0844
CON351	3	3	1	-0.100766	0.185159	0.244998
CON352	3	3	1	-0.162788	-0.0722197	0.745743
CON353	3	3	1	0.0593379	0.83727	-0.273963
CON354	3	3	1	0.0310201	0.743778	-0.176083
CON355	3	3	1	0.00412181	0.64136	-0.0387047
CON356	3	3	1	-0.0569236	0.352173	0.270236
CON357	3	3	1	-0.0103035	0.536665	0.0323368
CON358	3	3	1	-0.0942486	0.250601	0.482505
CON359	3	3	1	-0.0747975	0.279345	0.297012
CON360	3	3	1	-0.0643036	0.342223	0.416642
CON361	3	3	1	-0.103018	0.156303	0.296974
CON362	2	2	2	-0.330474	-0.804373	1.26465
CON363	3	3	1	0.0464995	0.807792	-0.137956
CON364	3	3	1	-0.00133087	0.564982	-0.190874
CON365	2	2	2	-0.411642	-1.11718	1.65976
CON366	2	2	2	-0.431059	-1.21997	1.6773
CON367	3	3	1	-0.19231	-0.140464	0.713973
CON368	2	2	2	-0.407636	-1.04874	1.65006
CON369	3	3	1	-0.0247532	0.502274	0.0834158
CON370	3	3	1	-0.00736082	0.547125	-0.0741003
CON371	3	3	1	0.0202125	0.652705	-0.152576
CON372	3	3	1	-0.022099	0.506602	0.0714374
CON373	3	3	1	-0.0108009	0.551829	0.0285717
CON374	3	3	1	0.0240204	0.668072	-0.227902
CON375	3	3	1	-0.0573783	0.347751	0.104142
CON376	3	3	1	-0.00707188	0.574874	0.0578836
CON377	3	3	1	-0.0162819	0.514068	-0.0198965
CON378	3	3	1	-0.00268206	0.566937	0.0484031
CON379	1	1	3	-0.962535	-3.50337	4.31605
CON380	3	3	1	-0.00535533	0.53993	-0.037781
CON381	3	3	1	-0.00322973	0.557866	-0.0784462
CON382	3	3	1	-0.0314629	0.456088	0.0388468
CON383	3	3	1	-0.0165384	0.490567	-0.0160759
CON384	3	3	1	0.0104297	0.639578	0.00598361
CON385	2	2	2	-0.393966	-1.05024	1.66207
CON386	3	3	1	-0.00996241	0.571893	-0.0168281
CON387	2	2	2	-0.481306	-1.40019	1.94791
CON388	3	3	1	-0.0285594	0.468407	0.0518821
CON389	3	3	1	0.00704384	0.639006	0.000305506
CON390	3	3	1	-0.0568145	0.371583	0.263591
CON391	3	3	1	-0.0978916	0.230188	0.482602
CON392	3	3	1	0.0108192	0.657003	-0.191995
CON393	3	3	1	-0.00116617	0.610165	0.140661
CON394	3	3	1	-0.200846	-0.241305	0.808405
CON395	3	3	1	0.00846498	0.63443	0.105142
CON396	3	3	1	-0.0302624	0.478803	0.0863534
CON397	3	3	1	-0.0273905	0.489481	0.169625
CON398	3	3	1	-0.0652082	0.339066	0.256945
CON399	2	2	2	-0.405289	-1.05686	1.68209
CON400	2	2	2	-0.462598	-1.33657	1.83976
CON401	2	2	2	-0.500394	-1.48442	2.05239
CON402	3	3	1	-0.0749574	0.309903	0.239307
CON403	2	2	2	-0.362141	-0.896475	1.426
CON404	3	3	1	-0.117628	0.0899002	0.33529
CON405	3	3	1	-0.0285343	0.469264	0.0218183
CON406	3	3	1	-0.00056467	0.580277	-0.00549698
CON407	2	2	2	-0.48464	-1.4721	1.85553
CON408	3	3	1	-0.0307946	0.449795	0.0900175
CON409	3	3	1	-0.0243614	0.468829	0.0638601
CON410	3	3	1	-0.0258711	0.477017	0.145595
CON411	3	3	1	0.015023	0.657064	-0.042387
CON412	2	2	2	-0.409668	-1.10765	1.69204
CON413	2	2	2	-0.508705	-1.57297	1.97588
CON414	3	3	1	-0.095019	0.175452	0.434831
CON415	2	2	2	-0.451925	-1.2844	1.90378
CON416	2	2	2	-0.354253	-0.888519	1.72209
CON417	3	3	1	-0.100461	0.134509	0.32472
CON418	3	3	1	0.00381095	0.593822	-0.0771517
CON419	2	2	2	-0.342979	-0.863266	1.34568
CON420	3	3	1	-0.00471976	0.552231	-0.0622923
CON421	3	3	1	0.0285148	0.707889	-0.0863178
CON422	2	2	2	-0.624365	-2.06647	2.49916
CON423	3	3	1	-0.0292153	0.455284	0.113068
CON424	3	3	1	0.0448482	0.758292	-0.264688
CON425	3	3	1	-0.0367647	0.420228	0.127784
CON426	2	2	2	-0.338637	-0.780208	1.50084
CON427	3	3	1	0.012443	0.640252	-0.0436177
CON428	3	3	1	0.0156554	0.635376	-0.0813847
CON429	2	2	2	-0.288972	-0.643085	1.38972
CON430	3	3	1	-0.0251679	0.478307	0.0976241
CON431	2	2	2	-0.28492	-0.561663	1.25682
CON432	3	3	1	-0.0215756	0.485058	0.0580784
CON433	3	3	1	0.0198792	0.672013	-0.092588
CON434	3	3	1	0.00195542	0.595693	0.0666066
CON435	3	3	1	-0.00267298	0.576156	-0.00667889
CON436	3	3	1	0.0260006	0.693548	-0.139833
CON437	3	3	1	-0.0148863	0.513038	0.0837635
CON438	3	3	1	-0.0116696	0.530869	0.0957104
CON439	3	3	1	-0.0101745	0.536604	-0.0202622
CON440	3	3	1	-0.0552689	0.326417	0.180297
CON441	3	3	1	-0.00423921	0.563796	-0.0223662
CON442	2	2	2	-0.467988	-1.35796	1.93087
CON443	2	2	2	-0.334115	-0.763591	1.48294
CON444	3	3	1	0.00180963	0.602697	0.0936589
CON445	3	3	1	-0.0060115	0.586071	0.0805579
CON446	3	3	1	-0.0328514	0.443955	0.234097
CON447	3	3	1	-0.0634126	0.284731	0.283735
CON448	3	3	1	-0.0584938	0.342086	0.286366
CON449	1	1	3	-1.0332	-3.5983	4.59077
CON450	2	2	2	-0.410617	-1.14265	1.76476
CON451	2	2	2	-0.455502	-1.29239	1.97061
CON452	3	3	1	0.0239035	0.674207	-0.12134
CON453	3	3	1	-0.0899502	0.168062	0.260131
CON454	3	3	1	-0.0100536	0.531882	0.0329425
CON455	3	3	1	0.000463	0.566554	-0.0662845
CON456	3	3	1	-0.0296057	0.44309	-0.0091089
CON457	3	3	1	-0.010181	0.552576	0.0360766
CON458	3	3	1	0.000982862	0.60141	0.108512
CON459	2	2	2	-0.313427	-0.739714	1.2746
CON460	2	2	2	-0.44057	-1.24455	1.86112
CON461	3	3	1	-0.00974661	0.513141	-0.0330457
CON462	3	3	1	0.0300633	0.753232	-0.0919986
CON463	3	3	1	-0.00443097	0.55297	0.0784228
CON464	3	3	1	-0.0743847	0.244433	0.194436
CON465	3	3	1	-0.0408166	0.424609	0.244363
CON466	2	2	2	-0.337919	-0.806325	1.46166
CON467	3	3	1	-0.0373783	0.416157	0.0886625

## Sheet: chr17_47477132_47478158
IDV	CNV genotype			Signal Intensity (log2 ratio)
	Raw	PCA	LDF	Raw	PCA	LDF
CASE1	3	3	1	0.0388355	0.4582	-0.100653
CASE2	3	3	1	0.0601358	0.523953	-0.186158
CASE3	3	3	1	0.0869102	0.66999	-0.285684
CASE4	3	3	1	0.0642944	0.586331	-0.176691
CASE5	2	2	2	-0.500401	-1.73725	1.98349
CASE6	2	2	2	-0.410178	-1.43105	1.72467
CASE7	3	3	1	0.0199104	0.370297	-0.0612747
CASE8	3	3	1	0.0701414	0.560382	-0.247416
CASE9	3	3	1	0.0980385	0.683733	-0.395285
CASE10	2	2	2	-0.371446	-1.24242	1.58429
CASE11	3	3	1	0.0380056	0.44568	-0.160631
CASE12	2	2	2	-0.48382	-1.66307	1.88143
CASE13	3	3	1	0.0294901	0.37936	-0.11045
CASE14	3	3	1	0.0454579	0.456579	-0.132579
CASE15	3	3	1	0.0867011	0.648764	-0.299921
CASE16	2	2	2	-0.267751	-0.747199	1.07678
CASE17	3	3	1	0.00701345	0.303768	0.0257145
CASE18	3	3	1	0.0660983	0.574156	-0.225077
CASE19	3	3	1	0.0590638	0.538039	-0.150428
CASE20	3	3	1	0.0562913	0.5029	-0.264663
CASE21	3	3	1	0.0396255	0.444414	-0.131806
CASE22	3	3	1	0.0160806	0.365432	-0.0924122
CASE23	3	3	1	-0.0210022	0.217844	0.132687
CASE24	3	3	1	0.0487705	0.479548	-0.0334582
CASE25	3	3	1	0.019218	0.370089	-0.107947
CASE26	3	3	1	0.0565744	0.498517	-0.227124
CASE27	2	2	2	-0.288132	-0.919245	1.17641
CASE28	2	2	2	-0.681592	-2.49836	2.95842
CASE29	2	2	2	-0.333969	-1.05898	1.4117
CASE30	3	3	1	0.0773516	0.589474	-0.294406
CASE31	3	3	1	0.0744895	0.593852	-0.239262
CASE32	3	3	1	0.0529262	0.503985	-0.138797
CASE33	2	2	2	-0.365093	-1.19382	1.40275
CASE34	3	3	1	0.069464	0.573816	-0.252747
CASE35	3	3	1	0.0481882	0.466398	-0.168329
CASE36	2	2	2	-0.421898	-1.43745	1.72061
CASE37	2	2	2	-0.37975	-1.2646	1.49887
CASE38	3	3	1	0.062042	0.545363	-0.261925
CASE39	3	3	1	0.055058	0.544172	-0.221411
CASE40	3	3	1	0.0602011	0.574282	-0.137018
CASE41	3	3	1	-0.0163725	0.261136	0.186532
CASE42	3	3	1	0.0407521	0.493757	-0.0700381
CASE43	3	3	1	0.123788	0.805984	-0.394229
CASE44	1	1	3	-0.887378	-3.3298	3.75209
CASE45	2	2	2	-0.329315	-1.04109	1.32119
CASE46	2	2	2	-0.382799	-1.25177	1.5218
CASE47	2	2	2	-0.258842	-0.764882	1.05095
CASE48	3	3	1	0.126392	0.831067	-0.52796
CASE49	3	3	1	0.0682933	0.572817	-0.193043
CASE50	3	3	1	0.0363473	0.426066	-0.165054
CASE51	3	3	1	0.0764753	0.6044	-0.318416
CASE52	3	3	1	0.0979804	0.694408	-0.273857
CASE53	3	3	1	0.0416274	0.49386	-0.157603
CASE54	3	3	1	0.099328	0.715802	-0.310036
CASE55	3	3	1	0.0641361	0.546833	-0.242793
CASE56	2	2	2	-0.174311	-0.396581	0.849133
CASE57	2	2	2	-0.345856	-1.11639	1.33228
CASE58	3	3	1	-0.0145552	0.211628	0.0439725
CASE59	3	3	1	0.100907	0.692125	-0.338974
CASE60	3	3	1	0.0481413	0.460241	-0.230169
CASE61	3	3	1	0.0598372	0.528231	-0.195834
CASE62	3	3	1	0.0118747	0.303006	-0.0933896
CASE63	3	3	1	0.0826206	0.638258	-0.275693
CASE64	3	3	1	0.0346731	0.427972	-0.118492
CASE65	3	3	1	0.110134	0.710518	-0.434072
CASE66	2	2	2	-0.299237	-0.925873	1.04677
CASE67	1	1	3	-1.00195	-3.76975	4.26583
CASE68	3	3	1	0.056157	0.511115	-0.177529
CASE69	3	3	1	0.0808898	0.63521	-0.218768
CASE70	3	3	1	0.00783076	0.297516	0.107443
CASE71	2	2	2	-0.396326	-1.32144	1.61069
CASE72	3	3	1	-0.0134801	0.226733	0.0202526
CASE73	3	3	1	0.0337384	0.399555	-0.145495
CASE74	3	3	1	0.134032	0.797036	-0.620153
CASE75	3	3	1	0.0331195	0.472571	0.0325386
CASE76	3	3	1	0.0497899	0.491272	-0.177504
CASE77	3	3	1	0.0909257	0.642381	-0.365409
CASE78	3	3	1	-0.00965002	0.225877	-0.00467807
CASE79	3	3	1	0.0959269	0.682587	-0.398279
CASE80	3	3	1	0.0833141	0.630721	-0.257667
CASE81	2	2	2	-0.168918	-0.406512	0.868311
CASE82	3	3	1	0.107383	0.778367	-0.416061
CASE83	3	3	1	0.165974	0.96315	-0.685253
CASE84	3	3	1	-0.0533429	-0.0131804	0.189698
CASE85	3	3	1	-0.0116548	0.188976	0.0265112
CASE86	3	3	1	0.144777	0.842038	-0.560661
CASE87	2	2	2	-0.234619	-0.703441	0.996514
CASE88	3	3	1	0.0447878	0.457989	-0.132909
CASE89	3	3	1	0.0494295	0.516574	-0.230328
CASE90	3	3	1	0.0741017	0.543038	-0.316695
CASE91	3	3	1	0.136168	0.851528	-0.420264
CASE92	3	3	1	0.0449507	0.491351	-0.106352
CASE93	3	3	1	-0.0137673	0.25329	0.0759196
CASE94	3	3	1	0.0741309	0.609398	-0.157241
CASE95	3	3	1	0.0516702	0.528148	-0.212371
CASE96	3	3	1	0.0259746	0.411746	-0.151835
CASE97	3	3	1	0.0274166	0.41001	-0.136444
CASE98	3	3	1	0.026723	0.386434	-0.0718062
CASE99	3	3	1	0.0504748	0.497149	-0.202746
CASE100	1	1	3	-1.09704	-4.21889	4.77875
CASE101	3	3	1	0.0871868	0.627808	-0.248744
CASE102	3	3	1	0.140998	0.886077	-0.430507
CASE103	3	3	1	0.129884	0.804218	-0.50721
CASE104	2	2	2	-0.409697	-1.37345	1.57082
CASE105	3	3	1	0.182566	0.932993	-0.545026
CASE106	2	2	2	-0.409988	-1.35957	1.61554
CASE107	3	3	1	0.0666823	0.56707	-0.29868
CASE108	3	3	1	0.0458116	0.462822	-0.090971
CASE109	2	2	2	-0.280538	-0.883075	1.2475
CASE110	2	2	2	-0.357328	-1.13091	1.4488
CASE111	2	2	2	-0.490666	-1.67922	1.96254
CASE112	3	3	1	0.152563	0.865838	-0.492495
CASE113	3	3	1	0.0833588	0.62572	-0.387547
CASE114	3	3	1	0.0182768	0.34035	-0.060871
CASE115	3	3	1	0.018813	0.346431	-0.0539747
CASE116	3	3	1	0.0181168	0.37175	-0.100533
CASE117	3	3	1	0.0266374	0.373321	-0.0821971
CASE118	3	3	1	-0.0176136	0.225779	0.100347
CASE119	3	3	1	0.0881824	0.624101	-0.280847
CASE120	3	3	1	-0.0269121	0.208583	-0.154485
CASE121	3	3	1	0.0135787	0.345636	-0.0516394
CASE122	2	2	2	-0.371983	-1.26873	1.54464
CASE123	3	3	1	0.0856246	0.648657	-0.340197
CASE124	3	3	1	0.0309733	0.42767	-0.10964
CASE125	3	3	1	0.0186985	0.363513	-0.0709351
CASE126	3	3	1	0.0485998	0.487034	-0.179265
CASE127	3	3	1	0.10197	0.721102	-0.407651
CASE128	3	3	1	0.0853292	0.623708	-0.314674
CASE129	3	3	1	0.0388905	0.478691	-0.118547
CASE130	3	3	1	0.0985642	0.693823	-0.332717
CASE131	3	3	1	0.0616864	0.529768	-0.241975
CASE132	3	3	1	0.0395581	0.444122	-0.149754
CASE133	2	2	2	-0.208529	-0.558318	0.891928
CASE134	3	3	1	0.0290676	0.396298	-0.13576
CASE135	3	3	1	0.0616747	0.542856	-0.246336
CASE136	3	3	1	0.0112868	0.346205	-0.0313926
CASE137	3	3	1	0.131055	0.806692	-0.49164
CASE138	3	3	1	0.0135086	0.337932	-0.0346777
CASE139	3	3	1	0.0318734	0.429246	-0.149208
CASE140	3	3	1	0.11434	0.720616	-0.438791
CASE141	3	3	1	0.0660678	0.540661	-0.205223
CASE142	2	2	2	-0.263075	-0.758927	1.04279
CASE143	3	3	1	0.0937313	0.667314	-0.413961
CASE144	3	3	1	0.00750377	0.279323	-0.0143694
CASE145	3	3	1	0.0370131	0.4462	-0.134677
CASE146	3	3	1	0.106856	0.712783	-0.386678
CASE147	3	3	1	0.0586717	0.543742	-0.267648
CASE148	3	3	1	0.0737208	0.622344	-0.256228
CASE149	3	3	1	0.0367735	0.461617	-0.0717023
CASE150	3	3	1	0.0833782	0.613479	-0.345819
CASE151	2	2	2	-0.239168	-0.676154	0.947899
CASE152	3	3	1	0.0738896	0.589874	-0.340645
CASE153	3	3	1	0.0526695	0.499758	-0.202496
CASE154	2	2	2	-0.586519	-2.13476	2.55443
CASE155	3	3	1	0.0563306	0.520753	-0.207973
CASE156	2	2	2	-0.729158	-2.65441	2.99345
CASE157	3	3	1	0.0180024	0.327763	-0.073893
CASE158	3	3	1	0.0289911	0.415615	-0.0945227
CASE159	3	3	1	0.0977152	0.698263	-0.350215
CASE160	3	3	1	0.0717905	0.565176	-0.184077
CASE161	3	3	1	-0.0233918	0.205462	0.126852
CASE162	3	3	1	0.0616487	0.527845	-0.179387
CASE163	3	3	1	0.0289639	0.387298	-0.106982
CASE164	3	3	1	0.0291859	0.404017	-0.0322846
CASE165	3	3	1	0.0921798	0.671764	-0.276413
CASE166	2	2	2	-0.273585	-0.860326	1.25773
CASE167	3	3	1	0.136822	0.843252	-0.439052
CASE168	2	2	2	-0.291127	-0.869362	1.16048
CASE169	3	3	1	0.0588871	0.556781	-0.14015
CASE170	2	2	2	-0.234245	-0.677138	1.0421
CASE171	2	2	2	-0.272556	-0.810281	1.22408
CASE172	2	2	2	-0.185385	-0.49782	0.877227
CASE173	3	3	1	0.0751663	0.607147	-0.199361
CASE174	2	2	2	-0.43737	-1.4709	1.6816
CASE175	3	3	1	0.0903655	0.654476	-0.320335
CASE176	3	3	1	0.0402084	0.463795	-0.138433
CASE177	3	3	1	0.049409	0.523138	-0.102105
CASE178	2	2	2	-0.221471	-0.637592	0.99407
CASE179	3	3	1	-0.120535	-0.135359	0.590598
CASE180	3	3	1	0.0543746	0.519911	-0.243898
CASE181	3	3	1	0.0532003	0.521686	-0.16136
CASE182	3	3	1	-0.0994841	-0.0839685	0.507957
CASE183	3	3	1	0.0314152	0.432065	-0.13848
CASE184	3	3	1	0.0426655	0.473576	-0.166877
CASE185	3	3	1	0.0502949	0.507143	-0.177196
CASE186	3	3	1	0.0724369	0.582369	-0.279448
CASE187	2	2	2	-0.302586	-0.941749	1.26986
CASE188	3	3	1	0.079604	0.627791	-0.285145
CASE189	3	3	2	-0.136619	-0.307341	0.727948
CASE190	3	3	1	0.0697346	0.581206	-0.216727
CASE191	2	2	2	-0.221772	-0.605381	1.03803
CASE192	2	2	2	-0.294197	-0.879755	1.17509
CASE193	3	3	1	0.135485	0.859685	-0.532397
CASE194	3	3	1	0.0711055	0.601223	-0.205413
CASE195	3	3	1	0.0815851	0.603494	-0.317153
CASE196	3	3	1	0.0927065	0.664115	-0.328864
CASE197	3	3	1	0.0801773	0.617922	-0.357022
CASE198	3	3	1	-0.135925	-0.228809	0.6072
CASE199	3	3	1	0.104618	0.783755	-0.251372
CASE200	3	3	1	0.151553	0.942396	-0.567027
CASE201	3	3	1	0.105366	0.722651	-0.3218
CASE202	3	3	1	0.043947	0.455348	-0.145361
CASE203	3	3	1	0.0768177	0.60216	-0.289448
CASE204	3	3	1	0.111	0.751015	-0.39166
CASE205	3	3	1	-0.0217936	0.189902	0.114074
CASE206	3	3	1	0.0715501	0.579635	-0.204795
CASE207	3	3	1	0.128224	0.82708	-0.508734
CASE208	2	2	2	-0.278943	-0.838858	1.16849
CASE209	3	3	1	0.12866	0.830177	-0.434026
CASE210	3	3	1	0.113721	0.768912	-0.442894
CASE211	2	2	2	-0.57135	-1.89378	2.55301
CASE212	3	3	1	0.0641934	0.551569	-0.266928
CASE213	3	3	1	0.062539	0.546574	-0.256573
CASE214	3	3	1	0.0731369	0.591614	-0.154406
CASE215	3	3	1	-0.0662354	-0.0278849	0.311871
CASE216	3	3	1	0.045176	0.470316	-0.092832
CASE217	3	3	1	0.0474124	0.469255	-0.178346
CASE218	3	3	1	0.0661581	0.557096	-0.169518
CASE219	3	3	1	0.068844	0.567472	-0.29707
CASE220	3	3	1	0.0411027	0.41507	-0.193132
CASE221	2	2	2	-0.464507	-1.6295	2.02599
CASE222	3	3	1	0.0703505	0.56361	-0.300105
CASE223	3	3	1	0.0270234	0.393043	-0.108174
CASE224	3	3	1	-0.045713	0.0786526	0.169586
CASE225	3	3	1	0.02622	0.374479	-0.0746182
CASE226	3	3	1	0.0300064	0.408587	-0.0786163
CASE227	3	3	1	0.0251145	0.406129	-0.0972488
CASE228	3	3	1	0.00229819	0.286868	0.00101669
CASE229	1	1	3	-1.11187	-4.28647	4.81575
CASE230	2	2	2	-0.333764	-1.07947	1.40795
CASE231	3	3	1	0.0248392	0.376598	-0.0720156
CASE232	3	3	1	0.0480811	0.495135	-0.197329
CASE233	3	3	1	0.104126	0.730226	-0.351444
CASE234	3	3	1	0.0983907	0.690403	-0.357338
CASE235	3	3	1	0.0618489	0.540538	-0.172936
CASE236	2	2	2	-0.435973	-1.47151	1.7459
CASE237	2	2	2	-0.338869	-1.1075	1.4597
CASE238	2	2	2	-0.443226	-1.48338	1.7755
CASE239	3	3	1	0.092168	0.67328	-0.383305
CASE240	3	3	1	0.0574128	0.510141	-0.256807
CASE241	3	3	1	0.0530998	0.506753	-0.152069
CASE242	3	3	1	0.0874571	0.661131	-0.287418
CASE243	3	3	1	0.0368581	0.450252	-0.112723
CASE244	3	3	2	-0.128323	-0.19447	0.870385
CASE245	2	2	2	-0.284845	-0.850307	1.23624
CASE246	2	2	2	-0.33335	-1.05024	1.38868
CASE247	3	3	1	-0.00276766	0.314042	0.0534707
CASE248	3	3	1	0.0559483	0.523984	-0.189298
CASE249	3	3	1	0.081378	0.620609	-0.297529
CASE250	3	3	1	0.0070252	0.323528	-0.0162581
CASE251	3	3	1	0.0474054	0.481426	-0.198925
CASE252	2	2	2	-0.27521	-0.810508	1.12986
CASE253	3	3	1	0.0759174	0.590496	-0.275349
CASE254	3	3	1	0.0499232	0.504788	-0.124794
CASE255	3	3	1	0.144748	0.866974	-0.549188
CASE256	3	3	1	0.056619	0.519726	-0.255924
CASE257	3	3	1	0.0619803	0.544722	-0.143379
CASE258	3	3	1	0.0587113	0.540814	-0.246944
CASE259	3	3	1	0.0729038	0.57051	-0.23592
CASE260	3	3	1	0.102388	0.732466	-0.39209
CASE261	3	3	1	0.0883965	0.643597	-0.288642
CASE262	3	3	1	-0.00748689	0.258077	0.0793437
CASE263	3	3	1	0.0508884	0.504086	-0.140757
CASE264	3	3	1	0.0431764	0.490297	-0.17648
CASE265	2	2	2	-0.401862	-1.38715	1.67584
CASE266	3	3	1	0.18417	1.10238	-0.641019
CASE267	2	3	2	-0.174721	-0.350811	1.00232
CASE268	3	3	1	0.0907217	0.713905	-0.304732
CASE269	3	3	1	0.0660819	0.535469	-0.235274
CASE270	3	3	1	0.00993151	0.314655	-0.0417615
CASE271	3	3	1	0.0352903	0.431558	-0.147464
CASE272	3	3	1	0.0536882	0.511734	-0.145524
CASE273	2	2	2	-0.267938	-0.697735	1.23045
CASE274	2	2	2	-0.361783	-1.21064	1.59303
CASE275	3	3	1	0.05327	0.500632	-0.191438
CASE276	3	3	1	0.0876455	0.636613	-0.310759
CASE277	3	3	1	0.114698	0.779002	-0.472979
CASE278	2	2	2	-0.434537	-1.49537	1.71761
CASE279	2	2	2	-0.179939	-0.400661	0.948702
CASE280	3	3	1	0.0562748	0.514531	-0.175241
CASE281	3	3	1	0.0663366	0.598887	-0.250862
CASE282	3	3	1	0.0821052	0.623395	-0.168688
CASE283	3	3	1	0.0970591	0.676865	-0.421311
CASE284	2	2	2	-0.188165	-0.468564	0.781009
CASE285	2	2	2	-0.415424	-1.38464	1.79561
CASE286	2	2	2	-0.374353	-1.20857	1.51719
CASE287	2	2	2	-0.195885	-0.524041	1.00741
CASE288	3	3	1	0.0819882	0.612859	-0.2919
CASE289	3	3	1	0.0802969	0.582594	-0.328876
CASE290	3	3	1	0.114191	0.752838	-0.331622
CASE291	3	3	1	0.0748244	0.600621	-0.245665
CASE292	3	3	1	0.0610536	0.531909	-0.183222
CASE293	3	3	1	0.171444	0.992897	-0.696057
CASE294	3	3	1	0.034778	0.41775	-0.124253
CASE295	3	3	1	0.120719	0.782597	-0.419336
CASE296	3	3	1	0.063944	0.52129	-0.152461
CASE297	3	3	1	0.0372127	0.423063	-0.128676
CASE298	2	2	2	-0.398137	-1.33286	1.69511
CASE299	3	3	1	0.0621825	0.542801	-0.174246
CASE300	3	3	1	0.0493082	0.503486	-0.123974
CASE301	3	3	1	0.0297802	0.42055	-0.163005
CASE302	2	2	2	-0.469502	-1.62625	1.84715
CASE303	3	3	1	0.0398817	0.449577	-0.0693258
CASE304	2	2	2	-0.373912	-1.19398	1.54354
CASE305	3	3	1	0.0962093	0.67673	-0.276956
CASE306	3	3	1	0.0472467	0.483776	-0.122632
CASE307	3	3	1	0.0267642	0.409682	-0.0730473
CASE308	3	3	1	0.0777208	0.610668	-0.26469
CASE309	3	3	1	0.00856328	0.33088	-0.056932
CASE310	2	2	2	-0.352734	-1.16679	1.51346
CASE311	3	3	1	0.00604986	0.327649	-0.00159433
CASE312	3	3	1	0.00104369	0.303313	0.0394212
CASE313	3	3	1	0.0289577	0.408707	-0.12293
CASE314	2	2	2	-0.351745	-1.15155	1.35159
CASE315	2	2	2	-0.38347	-1.31053	1.58108
CASE316	3	3	1	0.000256918	0.317802	0.00735477
CASE317	3	3	1	-0.00246187	0.308639	0.0563631
CASE318	3	3	1	0.0613854	0.52863	-0.257027
CASE319	3	3	1	-0.046384	0.0983434	0.19116
CASE320	3	3	1	0.01305	0.355649	-0.0223764
CASE321	3	3	1	0.137438	0.867299	-0.544859
CASE322	3	3	1	0.0258876	0.374382	-0.126917
CASE323	1	1	3	-0.774763	-2.86412	3.2219
CASE324	2	2	2	-0.498343	-1.77552	2.02996
CASE325	3	3	1	0.0727324	0.584616	-0.260598
CASE326	3	3	1	0.0557362	0.519455	-0.178757
CASE327	3	3	1	0.0375859	0.430964	-0.180402
CASE328	2	2	2	-0.41348	-1.44326	1.71395
CASE329	2	2	2	-0.440574	-1.54025	1.83533
CASE330	2	2	2	-0.379697	-1.26801	1.57856
CASE331	3	3	1	0.108984	0.735368	-0.440625
CASE332	2	2	2	-0.450053	-1.59514	1.86562
CASE333	3	3	1	-0.0131025	0.231675	0.0295917
CASE334	3	3	1	0.100466	0.70648	-0.38132
CASE335	2	2	2	-0.435391	-1.46457	1.69547
CASE336	3	3	1	0.0413333	0.479461	0.0218853
CASE337	2	2	2	-0.191067	-0.483164	0.883101
CASE338	2	2	2	-0.500754	-1.73743	2.0065
CASE339	3	3	1	0.068665	0.555374	-0.268936
CASE340	3	3	1	0.0764467	0.596168	-0.326606
CASE341	3	3	1	0.0661983	0.584483	-0.22069
CASE342	3	3	1	0.0157377	0.330838	-0.0251974
CASE343	3	3	1	0.0317457	0.407404	-0.117543
CASE344	2	2	2	-0.372559	-1.23932	1.62463
CASE345	2	2	2	-0.356387	-1.14965	1.4556
CASE346	3	3	1	0.0904814	0.648331	-0.365359
CASE347	2	2	2	-0.359331	-1.14871	1.44897
CASE348	3	3	1	0.0190653	0.353467	-0.0669273
CASE349	3	3	1	0.0652771	0.544008	-0.211501
CASE350	3	3	1	0.038968	0.430901	-0.158052
CASE351	3	3	1	0.0561837	0.522098	-0.203921
CASE352	3	3	1	0.0577023	0.498694	-0.162155
CASE353	3	3	1	-0.0229996	0.152415	0.0841069
CASE354	3	3	1	0.0705454	0.535818	-0.242293
CASE355	2	2	2	-0.364721	-1.2297	1.51994
CASE356	3	3	1	-0.00259095	0.246402	-0.0142546
CASE357	3	3	1	0.0305765	0.422706	-0.172973
CASE358	3	3	1	0.0845753	0.626692	-0.28157
CASE359	3	3	1	-0.00774699	0.2511	-0.0167437
CASE360	3	3	1	0.045607	0.461976	-0.213739
CASE361	3	3	1	0.0102074	0.32313	0.0260358
CASE362	2	2	2	-0.316465	-0.985639	1.24883
CASE363	2	2	2	-0.485965	-1.66775	1.89237
CASE364	3	3	1	0.0381843	0.427553	-0.120743
CASE365	3	3	1	0.0432127	0.464613	-0.113852
CASE366	3	3	1	0.0432085	0.460513	-0.143123
CASE367	2	2	2	-0.269555	-0.765158	1.13087
CASE368	3	3	1	-0.0110792	0.232686	0.0254238
CASE369	3	3	1	0.0530352	0.499562	-0.148986
CASE370	3	3	1	0.0356442	0.390914	-0.100627
CASE371	2	2	2	-0.462537	-1.5622	1.78047
CON1	3	3	1	-0.00713753	0.304135	0.0979266
CON2	2	2	2	-0.494036	-1.70775	1.90357
CON3	3	3	1	0.0793595	0.600208	-0.262109
CON4	3	3	1	0.0937001	0.668628	-0.409325
CON5	3	3	1	0.0707525	0.599743	-0.25261
CON6	2	2	2	-0.396875	-1.33143	1.6469
CON7	3	3	1	0.0274132	0.392613	-0.154945
CON8	3	3	1	0.0408635	0.456429	-0.114293
CON9	2	2	2	-0.391762	-1.26181	1.59914
CON10	2	2	2	-0.37398	-1.22497	1.46632
CON11	3	3	1	0.0538928	0.52569	-0.193905
CON12	3	3	1	0.0192525	0.358097	-0.070496
CON13	2	2	2	-0.185005	-0.468538	0.809245
CON14	2	2	2	-0.472422	-1.66469	1.94145
CON15	3	3	1	0.0520244	0.473288	-0.200704
CON16	3	3	1	0.0313154	0.400781	-0.084313
CON17	3	3	1	0.0277996	0.401457	-0.0299591
CON18	3	3	1	0.0423154	0.484997	-0.160764
CON19	2	2	2	-0.408857	-1.38671	1.74455
CON20	3	3	1	0.0648951	0.558498	-0.194066
CON21	3	3	1	0.0247298	0.37742	-0.167912
CON22	3	3	1	0.0529795	0.505791	-0.179123
CON23	3	3	1	0.0477351	0.490634	-0.164175
CON24	3	3	1	0.0751012	0.574693	-0.332764
CON25	2	2	2	-0.615268	-2.21916	2.36453
CON26	3	3	1	-0.0916818	-0.189072	0.432179
CON27	3	3	1	0.0243145	0.41093	-0.098844
CON28	3	3	1	0.0855003	0.648223	-0.222962
CON29	3	3	1	0.0271066	0.392401	-0.0725382
CON30	2	2	2	-0.470174	-1.68484	1.99013
CON31	3	3	1	0.0381274	0.439707	-0.0806433
CON32	3	3	1	0.176783	0.980586	-0.603596
CON33	3	3	1	0.00914429	0.32777	-0.0556361
CON34	3	3	1	0.0721874	0.593539	-0.244818
CON35	2	2	2	-0.196023	-0.500544	0.925621
CON36	3	3	1	0.125816	0.828164	-0.426927
CON37	3	3	1	0.0942564	0.667458	-0.373363
CON38	3	3	1	0.0558329	0.510335	-0.210593
CON39	3	3	1	0.0313247	0.437698	-0.150357
CON40	2	2	2	-0.437528	-1.47862	1.63706
CON41	3	3	1	0.0861306	0.631198	-0.282758
CON42	3	3	1	0.034993	0.417018	-0.122121
CON43	3	3	1	0.0756593	0.581994	-0.298119
CON44	2	2	2	-0.518255	-1.81311	2.20859
CON45	3	3	1	0.143298	0.869352	-0.538339
CON46	3	3	1	0.0605742	0.543883	-0.146301
CON47	3	3	1	0.0914115	0.671345	-0.290771
CON48	2	2	2	-0.265012	-0.809251	1.13309
CON49	3	3	1	0.0644064	0.554838	-0.247268
CON50	3	3	1	0.0520651	0.500323	-0.153836
CON51	3	3	1	0.0767744	0.609651	-0.341616
CON52	2	2	2	-0.352294	-1.14972	1.51871
CON53	3	3	1	0.05298	0.53665	-0.099877
CON54	3	3	1	0.00909256	0.326074	0.0126843
CON55	2	2	2	-0.262901	-0.799322	1.12824
CON56	2	2	2	-0.435109	-1.45994	1.72454
CON57	2	2	2	-0.392933	-1.34547	1.49592
CON58	3	3	1	0.051697	0.487	-0.170411
CON59	3	3	1	0.0319731	0.37361	-0.0615256
CON60	3	3	1	-0.126546	-0.193045	0.657661
CON61	3	3	1	0.0145686	0.36402	-0.0617276
CON62	3	3	1	0.0986962	0.697334	-0.387367
CON63	3	3	1	0.0922945	0.674164	-0.379601
CON64	3	3	1	0.0471921	0.476708	-0.14597
CON65	2	2	2	-0.491416	-1.72999	1.89823
CON66	3	3	1	0.076821	0.584045	-0.22836
CON67	3	3	1	0.0877999	0.649029	-0.231952
CON68	3	3	1	-0.0240917	0.214638	0.0813122
CON69	3	3	1	0.0468799	0.505902	-0.0987578
CON70	2	2	2	-0.406495	-1.40593	1.61832
CON71	3	3	1	0.0730744	0.606822	-0.289274
CON72	3	3	1	0.0753141	0.585449	-0.282774
CON73	3	3	1	0.0950905	0.662443	-0.42457
CON74	3	3	1	0.160345	0.927815	-0.604605
CON75	3	3	1	0.0931628	0.689212	-0.378447
CON76	2	2	2	-0.555756	-1.86019	2.28314
CON77	2	2	2	-0.183218	-0.437994	1.04515
CON78	3	3	1	0.0933872	0.681004	-0.278092
CON79	3	3	1	0.0628845	0.555231	-0.11888
CON80	2	2	2	-0.255855	-0.734757	1.13824
CON81	1	1	3	-1.28438	-4.94633	5.3331
CON82	2	2	2	-0.41593	-1.30573	1.99171
CON83	2	2	2	-0.353368	-1.11575	1.45252
CON84	2	2	2	-0.275299	-0.857922	1.05435
CON85	3	3	1	0.0850845	0.638733	-0.311999
CON86	3	3	1	0.089924	0.652367	-0.285105
CON87	3	3	1	0.0973884	0.705845	-0.297476
CON88	3	3	1	0.050054	0.450985	-0.264718
CON89	2	2	2	-0.414303	-1.37261	1.60995
CON90	3	3	1	0.0465487	0.464901	-0.190066
CON91	2	2	2	-0.473006	-1.64772	1.77189
CON92	3	3	1	0.0583747	0.519517	-0.239672
CON93	3	3	1	0.0915831	0.70658	-0.259141
CON94	2	2	2	-0.267305	-0.834828	1.0433
CON95	3	3	1	0.0458624	0.423544	-0.10688
CON96	2	2	2	-0.309484	-0.992579	1.45317
CON97	3	3	1	0.0964753	0.678135	-0.384324
CON98	3	3	1	0.0695972	0.567922	-0.250125
CON99	3	3	1	0.0966177	0.680273	-0.382537
CON100	3	3	1	0.0268063	0.40957	-0.0423565
CON101	3	3	1	0.0753261	0.598664	-0.236437
CON102	2	2	2	-0.244745	-0.676999	1.06577
CON103	3	3	1	0.0955646	0.699409	-0.207489
CON104	2	2	2	-0.262415	-0.737629	1.13038
CON105	1	1	3	-0.985366	-3.71398	4.24577
CON106	3	3	1	0.0420179	0.421812	-0.154784
CON107	3	3	1	0.0354145	0.401147	-0.113355
CON108	3	3	1	0.0612288	0.516101	-0.198731
CON109	3	3	1	0.0515209	0.498216	-0.177917
CON110	3	3	1	0.0663234	0.543427	-0.245427
CON111	3	3	1	0.0204443	0.351479	0.0108009
CON112	2	2	2	-0.391064	-1.3183	1.62895
CON113	2	2	2	-0.252425	-0.7418	1.08505
CON114	1	1	3	-1.30631	-5.03676	5.29703
CON115	3	3	1	0.0884348	0.635719	-0.313948
CON116	3	3	1	0.0301045	0.404522	-0.0507785
CON117	3	3	1	0.0259727	0.399389	-0.100654
CON118	3	3	1	0.0314877	0.416217	-0.118784
CON119	3	3	1	-0.0162576	0.204067	0.0860285
CON120	2	2	2	-0.390462	-1.3272	1.64972
CON121	2	2	2	-0.441525	-1.54042	1.71505
CON122	3	3	1	0.120501	0.764147	-0.473384
CON123	2	2	2	-0.307251	-0.935155	1.21254
CON124	3	3	1	0.0603316	0.566856	-0.246897
CON125	3	3	1	0.119606	0.749692	-0.521095
CON126	1	1	3	-0.884314	-3.29596	3.68828
CON127	3	3	1	-0.00863743	0.266574	0.0166285
CON128	3	3	1	0.0232688	0.389599	-0.047523
CON129	3	3	1	0.109174	0.757984	-0.342653
CON130	3	3	1	0.0190244	0.356278	-0.07161
CON131	3	3	1	0.0516696	0.504151	-0.198722
CON132	3	3	1	0.0529438	0.500854	-0.181843
CON133	3	3	1	0.0387623	0.453069	-0.112954
CON134	1	1	3	-1.0864	-4.14143	4.4433
CON135	3	3	1	0.0078597	0.313374	-0.0646654
CON136	2	2	2	-0.240885	-0.665742	0.945083
CON137	3	3	1	0.0333263	0.439263	-0.0394557
CON138	2	2	2	-0.256923	-0.772653	1.133
CON139	2	2	2	-0.202239	-0.523256	0.995039
CON140	3	3	1	0.0736192	0.621267	-0.274914
CON141	3	3	1	0.102301	0.705824	-0.38679
CON142	3	3	1	0.0646811	0.522016	-0.242363
CON143	1	1	3	-0.992436	-3.73506	4.21299
CON144	2	2	2	-0.24039	-0.710869	1.13026
CON145	3	3	1	0.0988379	0.679157	-0.375858
CON146	3	3	1	0.0367265	0.434077	-0.109738
CON147	3	3	1	0.0339174	0.433375	-0.103165
CON148	3	3	1	0.0120831	0.358373	0.0324533
CON149	3	3	1	-0.00175303	0.266745	0.102851
CON150	1	1	3	-1.04044	-3.88867	4.18137
CON151	3	3	1	0.0439466	0.463191	-0.162006
CON152	3	3	1	0.0739559	0.577612	-0.332927
CON153	3	3	1	-0.0141872	0.274734	0.105195
CON154	2	2	2	-0.263647	-0.721705	1.03437
CON155	3	3	1	0.0434624	0.473198	-0.0660314
CON156	3	3	1	0.0324267	0.412958	-0.122306
CON157	2	2	2	-0.350456	-1.16017	1.52707
CON158	3	3	1	0.0705547	0.593879	-0.275222
CON159	3	3	1	0.0938084	0.740152	-0.302861
CON160	3	3	1	0.0519082	0.527343	-0.098389
CON161	3	3	1	0.0135606	0.320787	0.00233716
CON162	3	3	1	-0.0401238	0.130714	0.293094
CON163	3	3	1	0.0718195	0.616176	-0.196519
CON164	3	3	1	0.0548051	0.501369	-0.230666
CON165	2	2	2	-0.305112	-0.919501	1.19079
CON166	3	3	1	0.0488213	0.491743	-0.198216
CON167	2	2	2	-0.239133	-0.679257	1.12804
CON168	3	3	1	0.0573427	0.549283	-0.202386
CON169	3	3	1	0.0279774	0.42317	-0.0707598
CON170	3	3	1	0.100572	0.692713	-0.317847
CON171	3	3	1	0.107044	0.739749	-0.355686
CON172	3	3	1	0.090984	0.668917	-0.325144
CON173	3	3	1	0.0801128	0.592154	-0.400585
CON174	2	2	2	-0.287151	-0.84359	1.21017
CON175	3	3	1	0.0676592	0.552966	-0.219168
CON176	3	3	1	0.102684	0.699424	-0.43985
CON177	3	3	1	0.0264564	0.362223	-0.097376
CON178	3	3	1	0.0519106	0.513654	-0.133853
CON179	3	3	1	0.104821	0.701055	-0.369115
CON180	3	3	1	0.159296	0.96071	-0.587686
CON181	3	3	1	0.128	0.80154	-0.29217
CON182	3	3	1	0.0958425	0.695938	-0.299326
CON183	2	2	2	-0.295577	-0.902103	1.20038
CON184	2	2	2	-0.255416	-0.72838	1.17809
CON185	3	3	1	-0.137898	-0.237917	0.528076
CON186	2	2	2	-0.286085	-0.870039	1.23932
CON187	3	3	1	0.0784989	0.66261	-0.340349
CON188	3	3	1	0.0903708	0.664472	-0.345848
CON189	3	3	1	0.0569939	0.530189	-0.190267
CON190	2	2	2	-0.24083	-0.59699	0.929527
CON191	3	3	1	0.0808623	0.650237	-0.271398
CON192	3	3	1	0.0899351	0.696535	-0.25424
CON193	2	2	2	-0.231926	-0.705633	1.08287
CON194	3	3	1	0.0810025	0.610664	-0.332112
CON195	3	3	1	0.119674	0.796764	-0.379118
CON196	3	3	1	0.0277255	0.401323	-0.136115
CON197	3	3	1	-0.0714269	-0.0164517	0.416681
CON198	3	3	1	0.0363667	0.425571	-0.145382
CON199	3	3	1	0.0563845	0.529849	-0.175183
CON200	3	3	1	0.0358981	0.422722	-0.124132
CON201	2	2	2	-0.341432	-1.10511	1.48818
CON202	3	3	1	0.0341294	0.429705	-0.123079
CON203	3	3	1	0.0271084	0.41593	-0.0621012
CON204	2	2	2	-0.194741	-0.505169	0.804262
CON205	3	3	1	-0.0263517	0.218665	0.122684
CON206	3	3	1	0.0741951	0.60272	-0.21878
CON207	3	3	1	0.0304943	0.385	-0.0784153
CON208	2	2	2	-0.393999	-1.24619	1.66085
CON209	3	3	1	0.0338631	0.45712	-0.139234
CON210	3	3	1	0.0133317	0.35841	-0.0709727
CON211	3	3	1	0.0149869	0.350997	-0.0654377
CON212	3	3	1	-0.0795916	-0.00640353	0.332385
CON213	3	3	1	0.0749807	0.605543	-0.113054
CON214	2	3	2	-0.172263	-0.379633	0.820189
CON215	3	3	1	0.126039	0.807444	-0.520984
CON216	3	3	1	0.0855252	0.642001	-0.276076
CON217	3	3	1	0.00878333	0.311928	-0.0115089
CON218	3	3	1	0.0196252	0.344639	0.0560434
CON219	3	3	1	0.0480045	0.491769	-0.180227
CON220	3	3	1	0.0448188	0.467202	-0.133403
CON221	2	2	2	-0.438602	-1.49572	1.68695
CON222	3	3	1	0.0430597	0.460417	-0.221533
CON223	2	2	2	-0.346502	-1.13149	1.51908
CON224	2	2	2	-0.384295	-1.25674	1.50186
CON225	3	3	1	0.0627976	0.547847	-0.216598
CON226	2	2	2	-0.332001	-1.10024	1.3328
CON227	2	2	2	-0.31835	-1.01592	1.36733
CON228	3	3	1	0.0799202	0.635095	-0.311124
CON229	3	3	1	0.0572108	0.524492	-0.205378
CON230	3	3	1	0.0697691	0.568496	-0.247429
CON231	3	3	1	0.0733615	0.582311	-0.218914
CON232	3	3	1	0.103581	0.739041	-0.257198
CON233	2	2	2	-0.361919	-1.21876	1.5712
CON234	3	3	1	0.0637289	0.551043	-0.26568
CON235	3	3	1	0.0519324	0.4999	-0.105762
CON236	3	3	1	0.0622984	0.504941	-0.255791
CON237	2	2	2	-0.253165	-0.773483	1.12538
CON238	3	3	1	0.0928838	0.657852	-0.318927
CON239	3	3	1	-0.0169387	0.196159	0.0954176
CON240	3	3	1	0.0423076	0.483973	-0.0720426
CON241	2	2	2	-0.368568	-1.19811	1.6401
CON242	3	3	1	0.0414868	0.467823	-0.105257
CON243	3	3	1	-0.0301444	0.165587	0.126234
CON244	3	3	1	0.00898348	0.316377	-0.0252719
CON245	3	3	1	0.0502192	0.492233	-0.13514
CON246	3	3	1	0.0108007	0.320214	-0.0248154
CON247	3	3	1	0.286833	1.2235	-0.719482
CON248	3	3	1	0.0156614	0.365606	-0.0442847
CON249	2	2	2	-0.450234	-1.54407	1.74155
CON250	3	3	1	0.00364246	0.3004	0.00603449
CON251	2	2	2	-0.262511	-0.818778	1.05807
CON252	2	2	2	-0.416192	-1.38478	1.70581
CON253	3	3	1	0.030346	0.409047	-0.136655
CON254	3	3	1	0.135095	0.84106	-0.533779
CON255	1	1	3	-1.1709	-4.48716	4.82223
CON256	3	3	1	0.076414	0.595507	-0.273407
CON257	2	2	2	-0.362836	-1.15872	1.42878
CON258	3	3	1	0.120305	0.80212	-0.38333
CON259	2	2	2	-0.351702	-1.15642	1.49498
CON260	3	3	1	0.0684085	0.573899	-0.173396
CON261	1	1	3	-1.29455	-5.00955	5.309
CON262	3	3	1	0.0696636	0.588824	-0.2342
CON263	2	2	2	-0.229024	-0.658437	1.03036
CON264	3	3	1	0.0372761	0.475955	-0.0747265
CON265	3	3	1	0.0562953	0.507134	-0.169303
CON266	3	3	1	0.0666112	0.565294	-0.295519
CON267	3	3	1	0.150159	0.914082	-0.563213
CON268	2	2	2	-0.427831	-1.4365	1.69571
CON269	2	2	2	-0.346347	-1.0736	1.48712
CON270	2	2	2	-0.355017	-1.17804	1.60069
CON271	3	3	1	0.0794784	0.61495	-0.343276
CON272	3	3	1	0.101772	0.698229	-0.422144
CON273	3	3	1	-0.0211602	0.230259	0.121451
CON274	3	3	1	0.0474376	0.465473	-0.175825
CON275	2	2	2	-0.437007	-1.50367	1.75761
CON276	3	3	1	0.016844	0.36544	-0.0319586
CON277	2	2	2	-0.378864	-1.24066	1.67521
CON278	3	3	1	0.101542	0.724451	-0.42677
CON279	3	3	1	0.0142881	0.357089	0.068238
CON280	2	2	2	-0.280895	-0.878965	1.2666
CON281	3	3	1	0.0933309	0.679909	-0.295571
CON282	3	3	1	0.0133328	0.300354	-0.0209276
CON283	3	3	1	0.0756494	0.598287	-0.319442
CON284	3	3	1	0.0391039	0.454178	-0.200258
CON285	3	3	1	-0.0130159	0.269306	0.0753183
CON286	3	3	1	0.0972184	0.707269	-0.221444
CON287	3	3	1	0.0357663	0.443443	-0.0994432
CON288	2	2	2	-0.283187	-0.864527	1.26976
CON289	3	3	1	0.0956823	0.697011	-0.340466
CON290	3	3	1	0.072293	0.569959	-0.263681
CON291	2	2	2	-0.26472	-0.769492	1.13031
CON292	3	3	1	0.00993676	0.32895	-0.0358106
CON293	2	2	2	-0.372364	-1.22832	1.69675
CON294	2	2	2	-0.360096	-1.19378	1.60351
CON295	3	3	1	-0.00900471	0.23007	0.0546038
CON296	2	2	2	-0.425999	-1.42585	1.6676
CON297	2	2	2	-0.372787	-1.19864	1.57306
CON298	3	3	1	-0.0513328	0.0554232	0.2382
CON299	3	3	1	0.0209321	0.374977	-0.0290403
CON300	3	3	1	0.0167024	0.373685	-0.065889
CON301	3	3	1	0.0455658	0.490611	-0.0891524
CON302	3	3	1	0.0781454	0.657474	-0.303613
CON303	3	3	1	0.0435753	0.456849	-0.228732
CON304	3	3	1	0.0380519	0.43042	-0.0567456
CON305	3	3	1	0.050315	0.49687	-0.258158
CON306	2	2	2	-0.331584	-1.10609	1.46964
CON307	3	3	1	0.0707645	0.58984	-0.218328
CON308	3	3	1	0.0247032	0.395583	-0.0633797
CON309	3	3	1	0.0169444	0.357703	-0.0382825
CON310	3	3	1	0.0217856	0.371168	-0.0888822
CON311	3	3	1	0.0484637	0.485403	-0.179556
CON312	3	3	1	0.0148327	0.361519	-0.0235107
CON313	3	3	1	0.0975719	0.687028	-0.32478
CON314	2	2	2	-0.324189	-0.991801	1.34619
CON315	3	3	1	-0.096884	-0.0945444	0.500957
CON316	3	3	1	0.0361105	0.393473	-0.0869955
CON317	3	3	1	0.0768832	0.607182	-0.323511
CON318	3	3	1	0.0145788	0.33953	-0.00575144
CON319	3	3	1	-0.0600145	0.0650672	0.19135
CON320	2	2	2	-0.326859	-1.05116	1.462
CON321	3	3	1	0.0207265	0.399283	-0.024706
CON322	1	1	3	-1.15144	-4.41626	4.4506
CON323	3	3	1	0.0548421	0.513206	-0.125828
CON324	3	3	1	0.0575085	0.522408	-0.0942476
CON325	3	3	1	0.0666585	0.56176	-0.0931682
CON326	3	3	1	0.0530676	0.459715	-0.123563
CON327	3	3	1	0.00502645	0.300669	-0.00358641
CON328	3	3	1	0.151425	0.925807	-0.601564
CON329	3	3	1	-0.0188419	0.227106	0.13677
CON330	3	3	1	0.0625486	0.558449	-0.260442
CON331	3	3	1	0.105568	0.724976	-0.403587
CON332	3	3	1	0.0589896	0.510698	-0.254712
CON333	2	2	2	-0.247381	-0.706673	1.18853
CON334	3	3	1	0.0476748	0.474254	-0.186926
CON335	3	3	1	0.0501629	0.45727	-0.275587
CON336	3	3	1	0.0752368	0.624123	-0.329364
CON337	3	3	1	0.08032	0.628614	-0.304901
CON338	3	3	1	0.047369	0.528393	-0.188722
CON339	3	3	1	0.0704629	0.596256	-0.237877
CON340	3	3	1	0.0705563	0.59954	-0.164496
CON341	3	3	1	0.0460976	0.48874	-0.216152
CON342	2	2	2	-0.336373	-1.07414	1.52112
CON343	3	3	1	0.0951722	0.679512	-0.329021
CON344	3	3	1	0.0259448	0.428861	0.00686881
CON345	2	2	2	-0.180752	-0.458256	0.847856
CON346	3	3	1	0.0362199	0.424291	-0.0483174
CON347	3	3	1	0.0350353	0.456007	-0.0500716
CON348	2	2	2	-0.245979	-0.688403	1.06669
CON349	3	3	1	0.0505604	0.538536	-0.15745
CON350	3	3	1	0.0727999	0.585701	-0.235788
CON351	3	3	1	-0.0196256	0.202877	0.107893
CON352	3	3	2	-0.162971	-0.353407	0.77137
CON353	2	2	2	-0.382003	-1.30605	1.59904
CON354	3	3	1	0.044169	0.483598	-0.0972866
CON355	3	3	1	0.0698819	0.5844	-0.211044
CON356	3	3	1	0.0631958	0.541492	-0.343024
CON357	3	3	1	0.0666501	0.565641	-0.157232
CON358	3	3	1	0.0433329	0.498774	-0.105044
CON359	2	2	2	-0.209889	-0.544685	1.00639
CON360	3	3	1	-0.0641116	0.0796329	0.329317
CON361	2	2	2	-0.385791	-1.23586	1.52581
CON362	2	2	2	-0.286924	-0.855826	1.20387
CON363	3	3	1	0.073438	0.562153	-0.28447
CON364	2	2	2	-0.26864	-0.830968	1.18521
CON365	3	3	1	0.0614939	0.556672	-0.216787
CON366	3	3	1	0.014874	0.370257	-0.0250162
CON367	2	2	2	-0.386521	-1.29059	1.45046
CON368	1	1	3	-1.40542	-5.4613	5.73944
CON369	2	2	2	-0.415104	-1.36289	1.6019
CON370	2	2	2	-0.335005	-1.08668	1.46287
CON371	3	3	1	0.0786572	0.611487	-0.254807
CON372	3	3	1	0.054493	0.524686	-0.297928
CON373	3	3	1	0.0174559	0.368729	-0.0237331
CON374	2	2	2	-0.33797	-1.09178	1.51188
CON375	3	3	1	0.11925	0.778879	-0.501413
CON376	3	3	1	0.021374	0.397612	-0.0660284
CON377	3	3	1	0.0158593	0.385112	-0.00118734
CON378	2	2	2	-0.28982	-0.859286	1.15937
CON379	2	2	2	-0.341852	-1.13875	1.50887
CON380	3	3	1	0.0800499	0.635361	-0.341543
CON381	3	3	1	0.0632168	0.562023	-0.153129
CON382	3	3	1	0.0403854	0.44289	-0.166037
CON383	3	3	1	0.0299396	0.400504	-0.166714
CON384	3	3	1	0.0626147	0.52757	-0.180176
CON385	3	3	1	0.0540348	0.513139	-0.185069
CON386	3	3	1	0.0250005	0.404401	-0.148486
CON387	3	3	1	-0.0240908	0.212579	0.153646
CON388	2	2	2	-0.389805	-1.25878	1.64711
CON389	2	2	2	-0.338697	-1.07411	1.4622
CON390	2	2	2	-0.322494	-1.0323	1.37038
CON391	3	3	1	0.0858581	0.671041	-0.319593
CON392	3	3	1	0.0638913	0.561234	-0.213368
CON393	2	2	2	-0.359092	-1.15582	1.51023
CON394	3	3	1	0.111744	0.745102	-0.469223
CON395	3	3	1	-0.0418929	0.0934868	0.196493
CON396	2	2	2	-0.363922	-1.16561	1.42089
CON397	2	2	2	-0.304533	-0.915252	1.28654
CON398	3	3	1	0.0667832	0.564717	-0.25556
CON399	3	3	1	0.0446459	0.475889	-0.129615
CON400	2	2	2	-0.381906	-1.25399	1.4625
CON401	2	2	2	-0.3012	-0.90163	1.39216
CON402	3	3	1	0.00452775	0.308166	0.0182506
CON403	3	3	1	0.0475109	0.479109	-0.188368
CON404	3	3	1	0.128944	0.810652	-0.421875
CON405	3	3	1	0.086433	0.663671	-0.370634
CON406	3	3	1	0.035276	0.424448	-0.145189
CON407	3	3	1	0.0479713	0.478932	-0.200303
CON408	1	1	3	-1.51611	-5.93205	6.14766
CON409	3	3	1	0.0561595	0.51587	-0.233275
CON410	3	3	1	0.0307555	0.414545	-0.0857804
CON411	3	3	1	0.0243934	0.381797	-0.0756824
CON412	3	3	1	0.0471811	0.470598	-0.178146
CON413	3	3	1	0.0427761	0.445621	-0.138741
CON414	3	3	1	0.10661	0.731156	-0.363993
CON415	3	3	1	0.0519393	0.50768	-0.183851
CON416	3	3	1	-0.101511	-0.121361	0.565267
CON417	3	3	1	0.0300227	0.417634	-0.148222
CON418	3	3	1	0.0466407	0.479243	-0.144932
CON419	2	2	2	-0.260699	-0.771448	1.03288
CON420	3	3	1	0.071738	0.577761	-0.278469
CON421	3	3	1	0.0204538	0.355939	-0.0767726
CON422	1	1	3	-1.77483	-6.95544	7.39157
CON423	3	3	1	0.0538661	0.517689	-0.156288
CON424	3	3	1	0.0865247	0.646264	-0.305725
CON425	3	3	1	0.0720127	0.577509	-0.249349
CON426	2	2	2	-0.380211	-1.27664	1.55602
CON427	3	3	1	0.0916336	0.656403	-0.323133
CON428	3	3	1	0.0267895	0.389452	-0.0979375
CON429	3	3	1	0.091292	0.659459	-0.38909
CON430	3	3	1	0.025001	0.394626	-0.086414
CON431	2	2	2	-0.325556	-1.02488	1.3104
CON432	3	3	1	0.031457	0.409078	-0.161567
CON433	3	3	1	0.0648505	0.5276	-0.241378
CON434	3	3	1	0.0547953	0.51414	-0.227326
CON435	3	3	1	-0.0127967	0.219582	0.10051
CON436	2	2	2	-0.373608	-1.17867	1.5264
CON437	2	2	2	-0.360235	-1.20129	1.57321
CON438	3	3	1	0.024602	0.392818	-0.0418136
CON439	2	2	2	-0.444141	-1.5057	1.69993
CON440	3	3	1	0.0338038	0.431751	-0.11717
CON441	3	3	1	0.0407957	0.469884	-0.0820005
CON442	2	2	2	-0.364434	-1.2128	1.51236
CON443	2	2	2	-0.329867	-1.05027	1.31493
CON444	2	2	2	-0.369887	-1.24107	1.51684
CON445	3	3	1	-0.0569066	0.0205688	0.131588
CON446	3	3	1	0.0797676	0.571052	-0.271608
CON447	2	2	2	-0.46707	-1.60977	1.83353
CON448	2	2	2	-0.489345	-1.75155	1.9959
CON449	3	3	1	0.038201	0.369924	-0.129862
CON450	3	3	1	-0.0149186	0.234131	0.0694909
CON451	2	2	2	-0.403422	-1.32575	1.58054
CON452	3	3	1	-0.00617237	0.248908	0.130703
CON453	3	3	1	-0.0397784	0.0835723	0.130875
CON454	3	3	1	0.0152925	0.315433	-0.0365699
CON455	2	2	2	-0.350428	-1.12333	1.3566
CON456	2	2	2	-0.313091	-1.00549	1.37906
CON457	3	3	1	0.0264238	0.373504	-0.0980389
CON458	2	2	2	-0.307538	-1.00254	1.34815
CON459	3	3	1	0.0400307	0.452344	-0.151558
CON460	3	3	1	0.0511358	0.505992	-0.191441
CON461	3	3	1	0.0480878	0.474728	-0.0914806
CON462	3	3	1	0.13227	0.837132	-0.513744
CON463	3	3	1	0.3666	1.82101	-0.809907
CON464	3	3	1	0.101664	0.69697	-0.40093
CON465	2	2	2	-0.292592	-0.898444	1.18769
CON466	3	3	1	0.0413785	0.448768	-0.221676
CON467	3	3	1	0.0215596	0.375254	-0.113845
